# Supplementary material for: Moisture-resistant radical anions of quinoxalin-2(1 H )-ones in aerial dioxygen activation
Source: Royal Society of Chemistry journal article supplement (doi:10.1039/d4ob00673a), 2024-01-01
Supplement: d4ob00673a1.pdf [file d4ob00673a1.pdf]

*Supporting information for....*

## **Moisture-Resistant Radical Anions of Quinoxalin-2(1H)-ones in Aerial Dioxygen**

### **Activation**

Sudip Sau,<sup>†</sup> Sathi Sahoo,<sup>†</sup> Anupam Manna and Prasenjit Mal\*

School of Chemical Sciences, National Institute of Science Education and Research (NISER),  
An OCC of Homi Bhabha National Institute, Bhubaneswar, PO Bhimpur-Padanpur, Via Jatni,  
District Khurda, Odisha 752050, India, E-mail: [pmal@niser.ac.in](mailto:pmal@niser.ac.in)

<sup>†</sup>equal contributing authors

### **CONTENTS**

|                                                          |         |
|----------------------------------------------------------|---------|
| General Methods                                          | S2-S4   |
| Synthesis                                                | S4-S8   |
| UV-Visible Experiment                                    | S7-S10  |
| Detection of H <sub>2</sub> O <sub>2</sub>               | S11     |
| Cyclic Voltammetry Studies                               | S12-S13 |
| FT-IR Spectral analysis                                  | S14     |
| Characterization Data                                    | S15-S26 |
| Copies of <sup>1</sup> H and <sup>13</sup> C NMR Spectra | S27-S66 |
| ESI-MS analysis of radical trapping experiment           | S67-S71 |
| HRMS analysis of Isotopic labelling experiment           | S72     |
| References                                               | S73     |

## EXPERIMENTAL SECTION

**Chemicals:** Chemicals like Potassium tert-butoxide, *o*-phenylenediamine, Ethyl glyoxylate & solvents were purchased commercially and used without further purification. Column chromatographic purifications of the compounds were performed using silica gel (mesh 100–200 or mesh 230–400) and hexane – ethyl acetate mixtures as eluent unless otherwise specified.

### **Instrumentation:**

**Absorption:** UV-VIS absorption spectra of **1a** in the absence and presence of KO<sup>t</sup>Bu in DMSO were recorded with JascoV-730 spectrophotometer (Sl. No. Ao33661798).

**Nuclear magnetic resonance measurements:** NMR spectra were recorded on a 700 MHz or 400 MHz instrument at 25 °C. The chemical shift values are reported in parts per million (ppm) with respect to residual trichloromethane (7.26 ppm for <sup>1</sup>H and 77.16 ppm for <sup>13</sup>C) and dimethyl sulfoxide (2.50 ppm for <sup>1</sup>H and 39.52 ppm for <sup>13</sup>C). The peak patterns are designated as follows: s: singlet; d: doublet; t: triplet; q: quartet; m: multiplet; dd: doublet of doublets; td: triplet of doublets; br s: broad singlet. The coupling constants (*J*) are reported in hertz (Hz).

**High-resolution mass spectra (HR-MS):** HR-MS were recorded on a TOF Q-II (Bruker) (time of flight) mass spectrometer. Clear solutions of samples were prepared after dissolving in MeCN.

**Fourier-transform-Infrared spectra (FTIR):** Infrared spectral data are reported in wave number (cm<sup>-1</sup>). FT-IR spectra were recorded after making thin layer of the compounds on the surface of KBr crystal using dichloromethane.

**Melting point measurements:** Melting points of the compounds were determined using a digital melting point apparatus and are uncorrected.

**Cyclic Voltammetry (CV):** Cyclic voltammetric data were obtained from the CH Instruments Electrochemical Workstation (Model: 600E, SN: I1599) in dry and oxygen-free Dichloromethylene Chloride containing 0.1 M tetrabutylammonium hexafluorophosphate as a supporting electrolyte. The experiment was conducted using a three-electrode setup consisting platinum electrode as working electrode, Ag/AgCl electrode as reference electrode, and platinum wire as counter electrode. The deoxygenation of DCM solvent was done by purging Ar gas into the electrolytic solution with the help of a long needle syringe for 2 min.

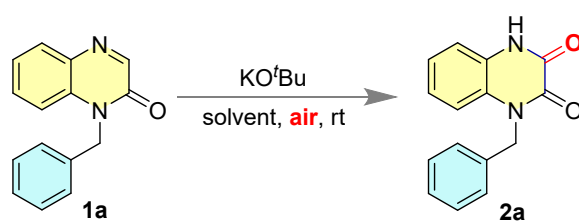

**Table S1.** Condition Optimization.<sup>a</sup>

| Entry | Reagent (equiv)          | Solvent     | Time (h) | Yield (%) <sup>[b]</sup> |
|-------|--------------------------|-------------|----------|--------------------------|
| 1     | KO <sup>t</sup> Bu (2.0) | DMSO        | 4        | 56                       |
| 2     | KO <sup>t</sup> Bu (2.0) | DMSO        | 6        | 70                       |
| 3     | KO <sup>t</sup> Bu (2.0) | DMSO        | 8        | 74                       |
| 4     | KO <sup>t</sup> Bu (2.0) | DMSO        | 12       | 92                       |
| 5     | KO <sup>t</sup> Bu (2.0) | DMSO        | 16       | 89                       |
| 6     | KO <sup>t</sup> Bu (2.0) | ACN         | 12       | 61                       |
| 7     | KO <sup>t</sup> Bu (2.0) | 1,4-Dioxane | 12       | 48                       |
| 8     | KO <sup>t</sup> Bu (2.0) | DMF         | 12       | 34                       |
| 9     | KO <sup>t</sup> Bu (2.0) | THF         | 12       | NR <sup>c</sup>          |
| 10    | KO <sup>t</sup> Bu (2.0) | 1,2-DCE     | 12       | NR <sup>c</sup>          |
| 11    | KO <sup>t</sup> Bu (1.0) | DMSO        | 12       | 50                       |

|    |                                       |      |    |                    |
|----|---------------------------------------|------|----|--------------------|
| 12 | KO <sup>t</sup> Bu (1.5)              | DMSO | 12 | 53                 |
| 13 | KO <sup>t</sup> Bu (3.0)              | DMSO | 12 | 80                 |
| 14 | KOH (2.0)                             | DMSO | 12 | trace              |
| 15 | Cs <sub>2</sub> CO <sub>3</sub> (2.0) | DMSO | 12 | NR <sup>b,c</sup>  |
| 16 | KO <sup>t</sup> Bu (2.0)              | DMSO | 12 | Trace <sup>d</sup> |

<sup>a</sup>Standard Conditions **1a** (0.169 mmol), KO<sup>t</sup>Bu (2.0 equiv.) in 2 mL of solvent at room temperature for 12 h in aerobic condition. <sup>b</sup> Isolated Yields. <sup>c</sup>No Reaction. <sup>d</sup>Ar-atmosphere.

## Synthesis

**Preparation of starting materials.** Starting materials are known and were prepared by following the literature known procedure<sup>1</sup>

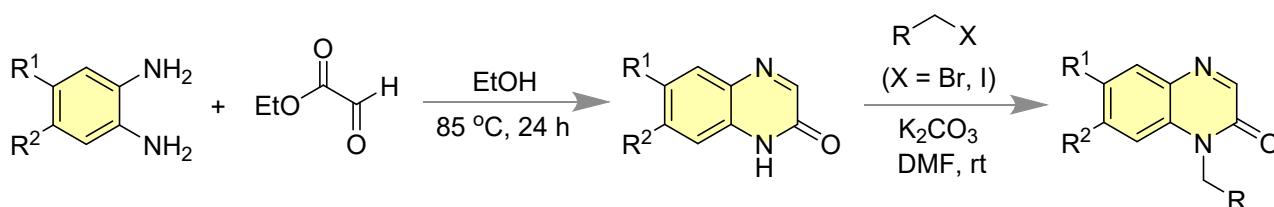

**Figure S1.** Procedure for the synthesis of 1-benzylquinoxaline-2-one (**1a**).

**Synthetic procedure for 1-benzyl-1,4-dihydroquinoxaline-2,3-dione (2a).** To an oven-dried 10 mL round bottom flask, 1-benzylquinoxalin-2(1*H*)-one (**1a**) (60 mg, 0.254 mmol, 1.0 equiv) and 2.0 mL DMSO were taken. Next, KO<sup>t</sup>Bu (57.0 mg, 0.508 mmol, 2.0 equiv) was added to it and the reaction mixture was stirred at room temperature for 12 hours under an aerobic atmosphere. After completion of the reaction, it was diluted with water (10 mL) and extracted with ethyl acetate (3×5 mL). The combined organic phase was then dried over anhydrous sodium sulphate and evaporated under reduced pressure. Purification using column

chromatography on silica gel provided the product 1-benzyl-1,4-dihydroquinoxaline-2,3-dione (**2a**) as a yellow solid with 92% yield.

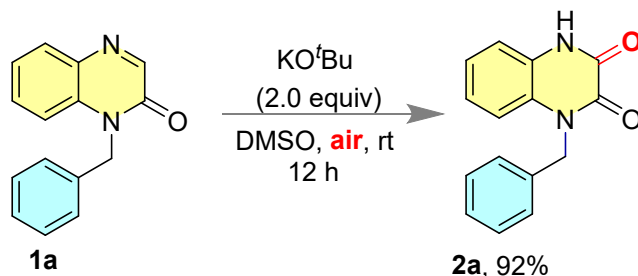

**Figure S2.** Procedure for the synthesis of 1-benzyl-1,4-dihydroquinoxaline-2,3-dione (**2a**).

**A representative method for synthesizing 1-(4-(phenylethynyl)benzyl)-1,4-dihydroquinoxaline-2,3-dione (5a).** <sup>1a</sup> To an oven-dried sealed tube charged with a magnetic stirring bar and 1-(4-bromobenzyl)-1,4-dihydroquinoxaline-2,3-dione (**2h**) (60 mg, 0.181 mmol, 1.0 equiv), PdCl<sub>2</sub>(PPh<sub>3</sub>)<sub>2</sub> (6 mg, 0.009 mmol, 5 mol %), and CuI (7 mg, 0.036 mmol, 20 mol %) in 2 mL of anhydrous DMF and 1 mL of Et<sub>3</sub>N mixture was added phenylacetylene (30  $\mu$ L, 0.271 mmol, 1.5 equiv) and it was stirred in a preheated oil bath of 80 °C temperature for 24 h under argon atmosphere. After completion, the reaction mixture was cooled to room temperature. The organic layer was extracted with ethyl acetate, dried over Na<sub>2</sub>SO<sub>4</sub>, and concentrated under reduced pressure. Column purification provided the desired product 1-(4-(phenylethynyl)benzyl)-1,4-dihydroquinoxaline-2,3-dione (**5a**) in 72% yield.

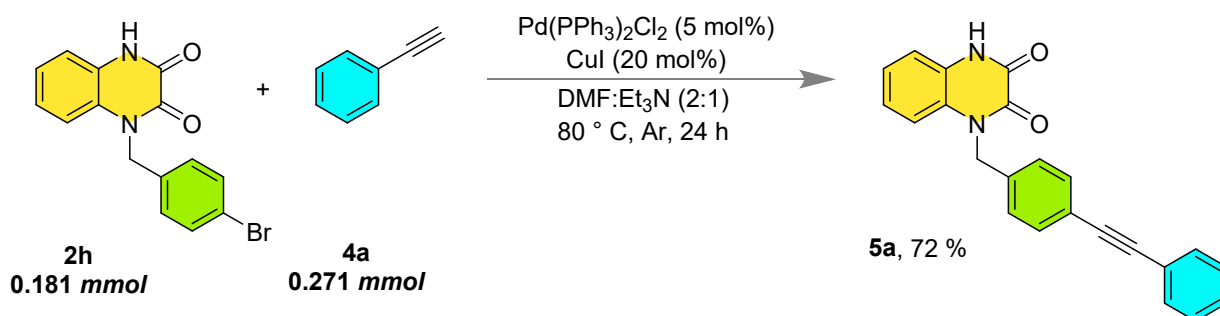

**Figure S3.** Procedure for the synthesis of 1-(4-(phenylethynyl)benzyl)-1,4-dihydroquinoxaline-2,3-dione (**5a**).

**A representative method for synthesizing 1-(3-(p-tolyl)prop-2-yn-1-yl)-1,4-dihydroquinoxaline-2,3-dione (**5b**).** <sup>2</sup>To an oven-dried sealed tube charged with a magnetic stirring bar and 4-iodo toluene (40 mg, 0.180 mmol, 1.0 equiv), PdCl<sub>2</sub>(PPh<sub>3</sub>)<sub>2</sub> (6 mg, 0.009 mmol, 5 mol %), and CuI (7 mg, 0.036 mmol, 20 mol %) in 2 mL of anhydrous DMF and 1 mL of Et<sub>3</sub>N mixture was added 1-(prop-2-yn-1-yl)-1,4-dihydroquinoxaline-2,3-dione **2i** (54 mg, 0.270 mmol, 1.5 equiv) and it was stirred at 80 °C for 24 h under argon atmosphere. After completion, the reaction mixture was cooled to room temperature and washed with brine solution. The organic layer was extracted with ethyl acetate, dried over Na<sub>2</sub>SO<sub>4</sub>, and concentrated under reduced pressure. Column purification provided the desired product 1-(3-(p-tolyl)prop-2-yn-1-yl)-1,4-dihydroquinoxaline-2,3-dione (**5b**) in 65% yield.

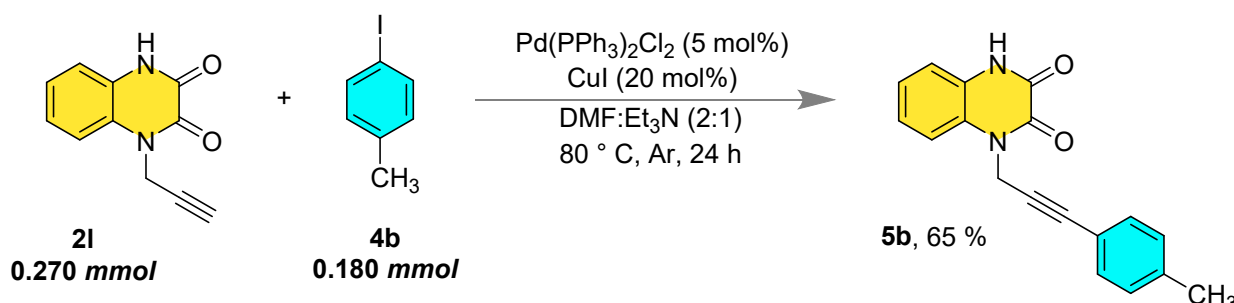

**Figure S4.** Procedure for the synthesis of 1-(3-(p-tolyl)prop-2-yn-1-yl)-1,4-dihydroquinoxaline-2,3-dione (**5b**).

**Gram-scale synthesis of 1-benzyl-1,4-dihydroquinoxaline-2,3-dione (**2a**).** To an oven-dried 50 mL round bottom flask, 1-benzylquinoxalin-2(1*H*)-one (**1a**) (1.0 g, 4.23 mmol, 1.0 equiv) and 20 mL DMSO was taken. Next, KO<sup>t</sup>Bu (949 mg, 8.46 mmol, 2.0 equiv) was added to it and the reaction mixture was stirred at room temperature for 24 hours under an aerobic atmosphere. After completion of the reaction, it was diluted with water and extracted with ethyl acetate. The combined organic phase was then dried over anhydrous sodium sulphate and

evaporated under reduced pressure. Purification using column chromatography on silica gel provided the product 1-benzyl-1,4-dihydroquinoxaline-2,3-dione (**2a**) as a yellow solid with 74% yield.

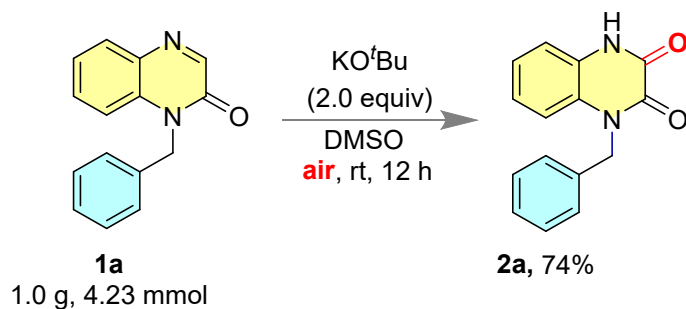

**Figure S5.** Gram-scale synthesis of 1-benzyl-1,4-dihydroquinoxaline-2,3-dione (**2a**).

**Procedure for the radical quenching experiments.**<sup>1a</sup> To an oven-dried 10 mL round bottom flask charged with a magnetic stirring bar, 1-benzylquinoxalin-2(1H)-one (60 mg, 0.254 mmol, 1.0 equiv) and quencher (2.0 equiv) were dissolved in 2.0 mL DMSO solvent. KO<sup>t</sup>Bu (57.0 mg, 0.508 mmol, 2.0 equiv) was added to it and the reaction mixture was stirred at room temperature for 12 h under an aerobic atmosphere. After that, the reaction mixture was diluted with water (10 mL) and extracted with ethyl acetate (3×5 mL). The resulting organic solution was dried over anhydrous sodium Na<sub>2</sub>SO<sub>4</sub> and concentrated under reduced pressure. Corresponding yields of the reactions were calculated after column chromatography.

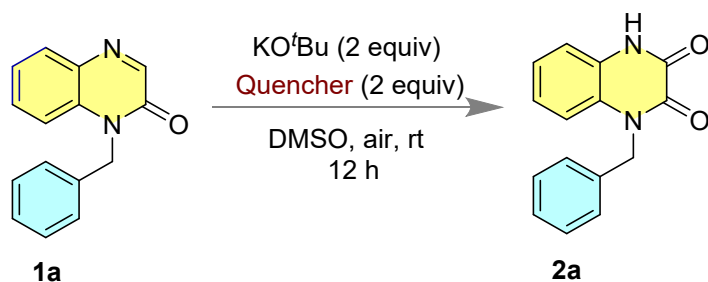

| Entry | Quencher          | Yield (%) <sup>b</sup> | Role                     |
|-------|-------------------|------------------------|--------------------------|
| 1     | BHT               | trace                  | radical scavenger        |
| 2     | TEMPO             | 46                     | radical scavenger        |
| 3     | CuCl <sub>2</sub> | trace                  | electron scavenger       |
| 4     | Sodium azide      | 79                     | Singlet oxygen scavenger |

**Figure S6.** Control experiments in the presence of different quenchers (<sup>b</sup>Isolated yield).

**Procedure for the isotopic labelling experiments.** To an oven-dried 10 mL round bottom flask charged with a magnetic stirring bar, 1-benzylquinoxalin-2(1*H*)-one (60 mg, 0.254 mmol, 1.0 equiv) and different isotopes of H<sub>2</sub>O (D<sub>2</sub>O and H<sub>2</sub><sup>18</sup>O) (1.2 equiv) were dissolved in 2.0 mL dry DMSO solvent. KO<sup>t</sup>Bu (57.0 mg, 0.508 mmol, 2.0 equiv) was added to it and the reaction mixture was stirred at room temperature for 12 hours under an aerobic atmosphere. After that, the reaction mixture was diluted with water (10 mL) and extracted with ethyl acetate (3×5 mL). The resulting organic solution was dried over anhydrous sodium Na<sub>2</sub>SO<sub>4</sub> and concentrated under reduced pressure. The crude mixture was taken for HRMS analysis.

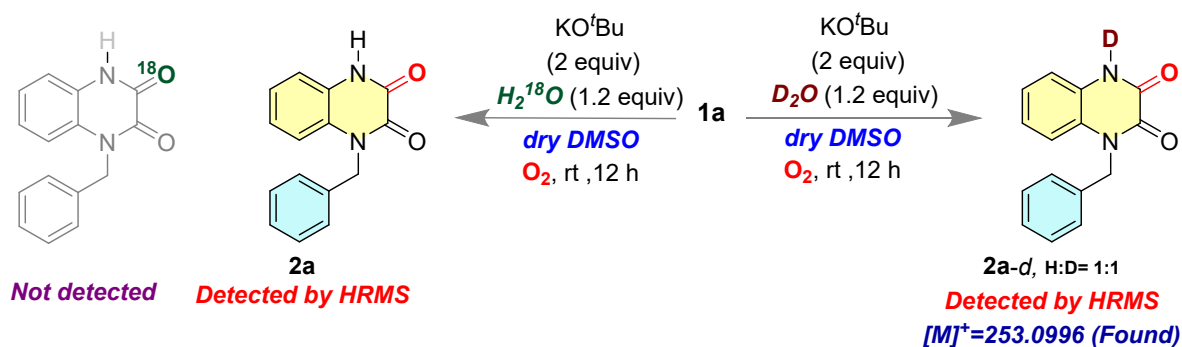

**Figure S7.** Isotopic labelling experiments with H<sub>2</sub><sup>18</sup>O and D<sub>2</sub>O.



To investigate about the formation of the charge-transfer complex, we recorded UV-Visible spectra of **1a**, and the mixture of the starting compound **1a** with KO<sup>t</sup>Bu in the 0.2 (M) DMSO and the corresponding UV-Visible spectra were plotted. In DMSO solution, substrate **1a** shows an absorption band at 347 nm but after the addition of KO<sup>t</sup>Bu another absorption at 429 nm was observed with an intense purple color (Figure S6). When BHT was added to the mixture of **1a** and KO<sup>t</sup>Bu a new absorption at 583 nm was observed whereas BHT itself do not show any absorption in presence of KO<sup>t</sup>Bu which revealed the formation of trapped radical intermediate whereas the final compound **2a** shows an absorption at 313 nm in DMSO solvent.

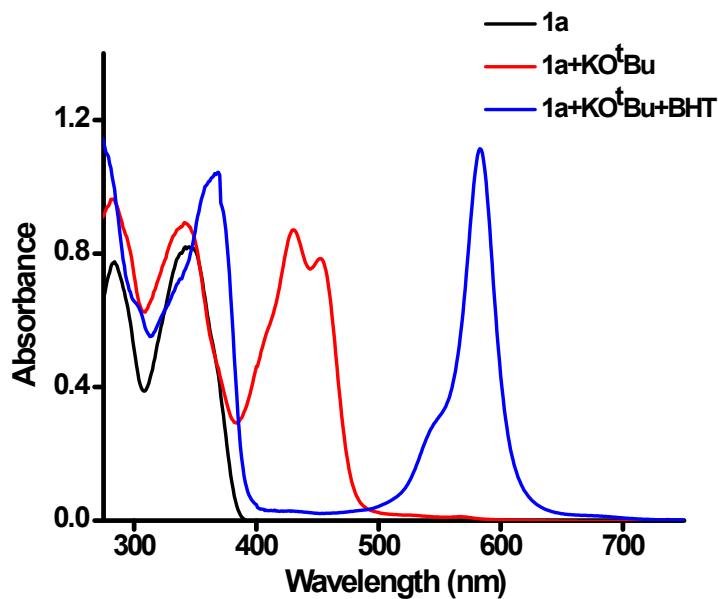

**Figure S8.** UV- visible spectra of **1a**, **1a**/KO<sup>t</sup>Bu and **1a**/KO<sup>t</sup>Bu/BHT in DMSO.

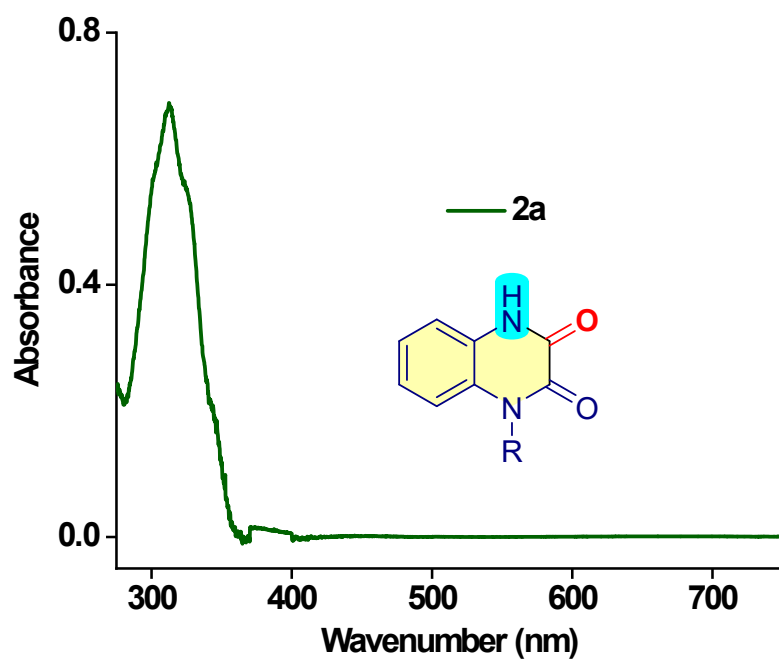

Figure S9. UV- visible spectra of 2a in DMSO.

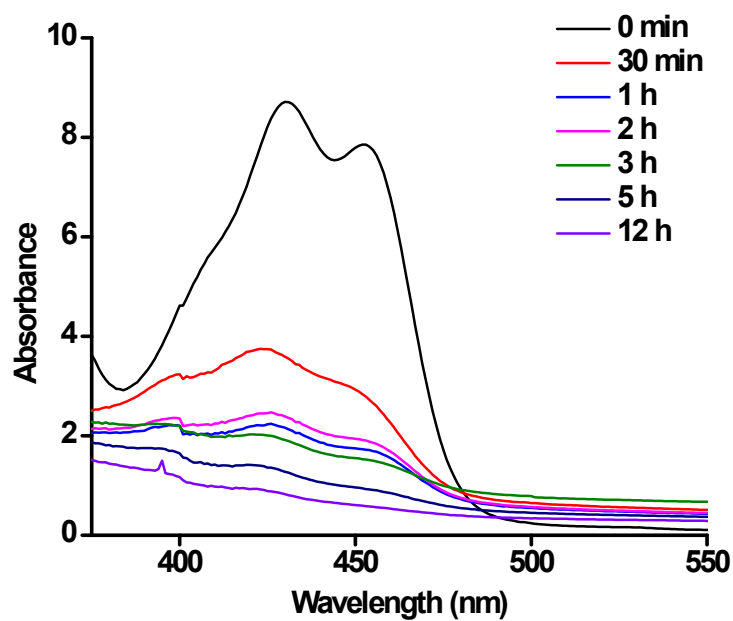

Figure S10. Time dependent UV- visible spectra of 1a in presence of KOtBu in DMSO under aerobic condition.

**Detection of hydrogen peroxide ( $\text{H}_2\text{O}_2$ ).**<sup>3</sup> The KI test was performed to detect the evolution of  $\text{H}_2\text{O}_2$  as the by product during the reaction. In vial **A** the mixture of **1a** and potassium *tert*-butoxide shows the purple colour but in vial **B** after the addition of 2 equiv. of KI in the reaction mixture the colour turned into magenta colour from intense purple colour. In vial C in presence of strong acid like HCl the colour turned into green colouration which might be for the oxidation of iodide ion to  $\text{I}_3^-$  which further was confirmed by recording the absorption band of UV-Visible spectra of the mixture of **1a**, KO<sup>t</sup>Bu, KI in presence of HCl at 368 nm. This band arises might be for the formed triiodide anion. This experiment confirmed the evolution of  $\text{H}_2\text{O}_2$ .

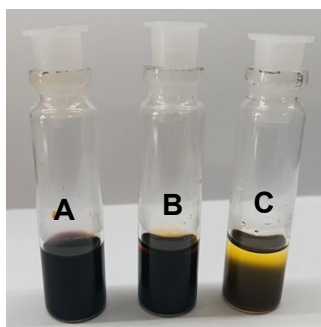

**Figure S11.** Control experiments to detect of  $\text{H}_2\text{O}_2$  in presence of KI under acidic condition.

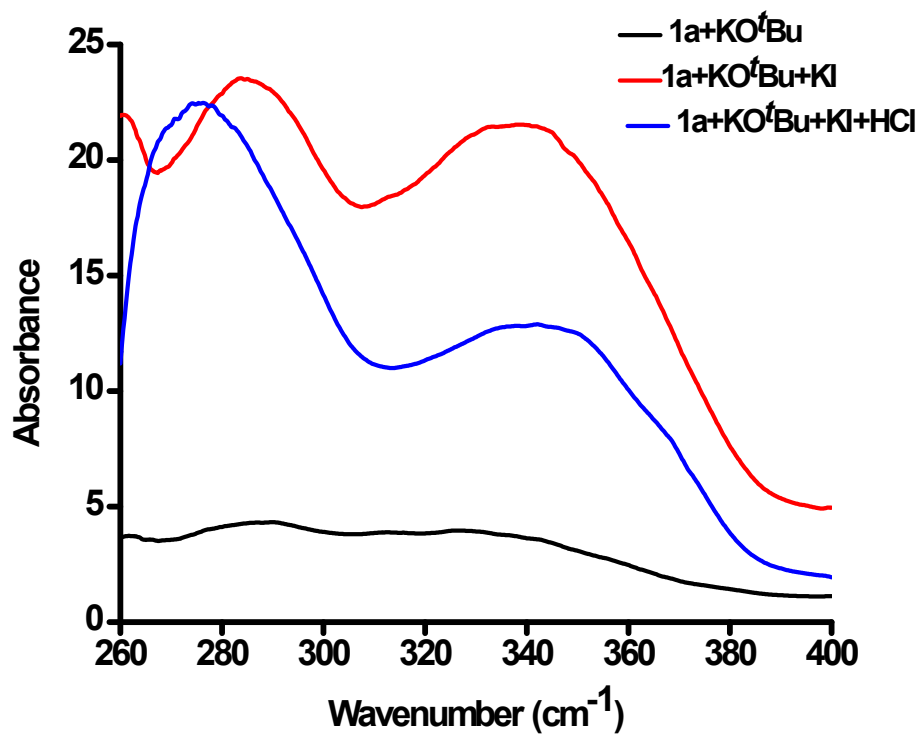

**Figure S12.** UV- visible spectra of **1a** in presence of KO<sup>t</sup>Bu, KI and HCl separately in DMSO.

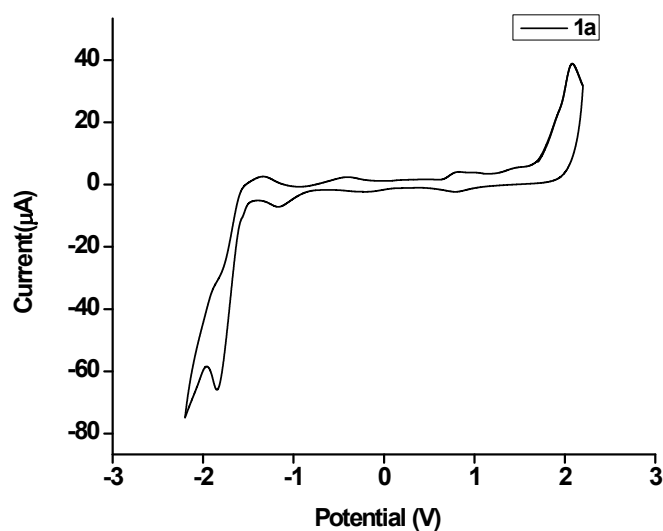

**Figure S13.** IUPAC-CV of 1-benzylquinoxalin-2(1*H*)-one (**1a**) using  $n\text{Bu}_4\text{NPF}_6$  as an electrolyte in dry degassed DCM.

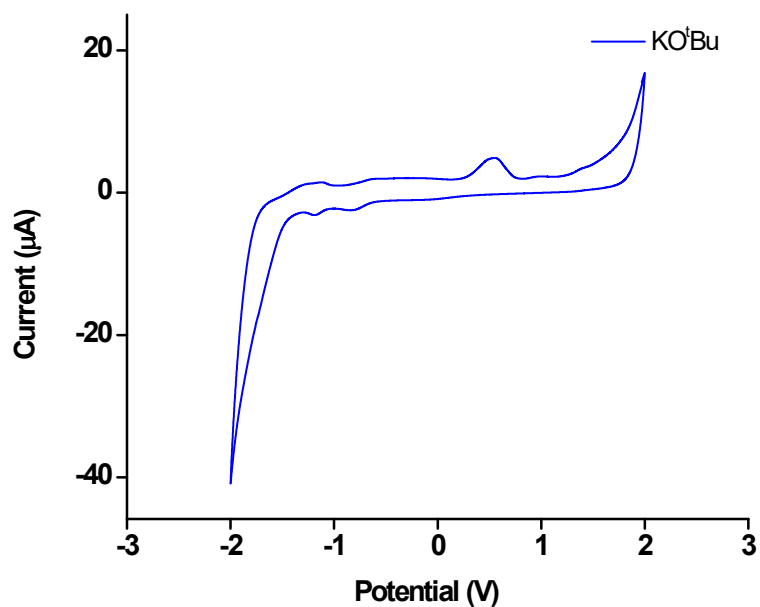

**Figure S14.** IUPAC-CV of Potassium *tert*-butoxide using  $n\text{Bu}_4\text{NPF}_6$  as an electrolyte in dry degassed DCM.

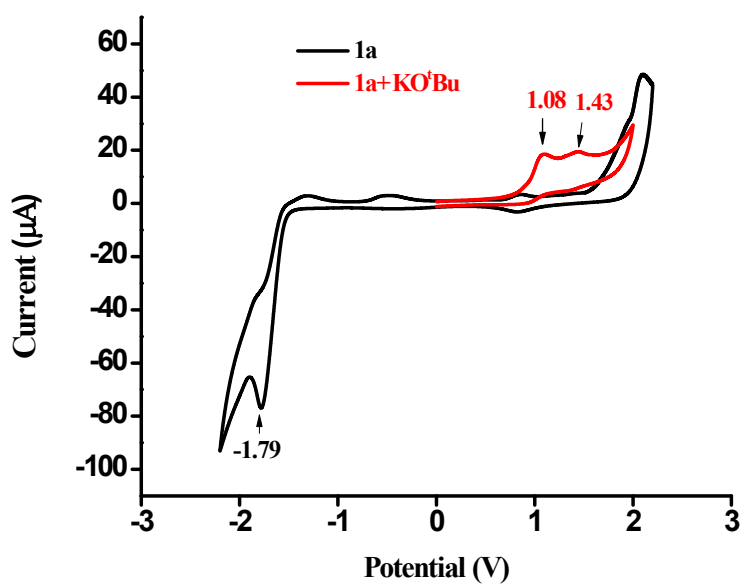

**Figure S15.** IUPAC-CV of 1-benzylquinoxalin-2(1*H*)-one (**1a**) and **1a** with KOtBu using  $n\text{Bu}_4\text{NPF}_6$  as an electrolyte in dry degassed DCM.

To get a detailed analysis about the formation of a stable radical anion intermediate we have performed the FT-IR study and it was observed that the two frequencies at 3007  $\text{cm}^{-1}$  and 2914  $\text{cm}^{-1}$  of **1a** disappeared after the addition of  $\text{KO}^t\text{Bu}$  while the  $\text{C}=\text{O}$  has retained its stretching frequency at 1643  $\text{cm}^{-1}$  in both the cases (Figure S14).

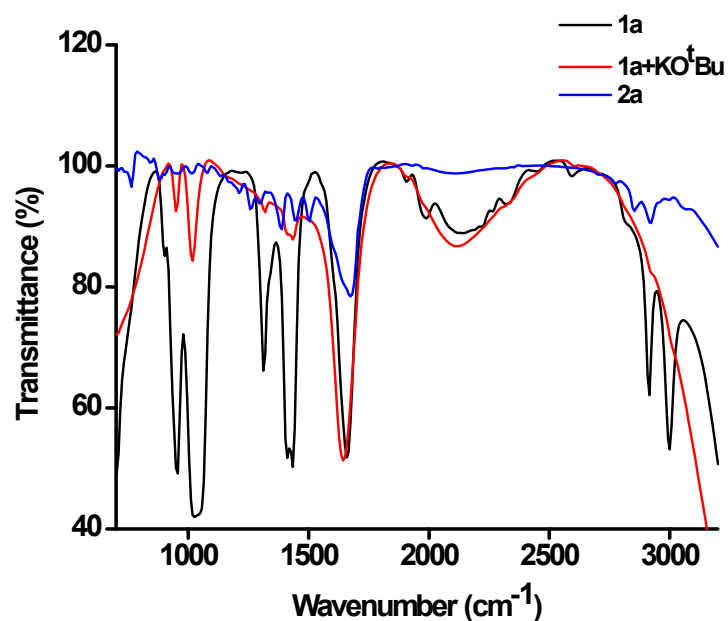

**Figure S16.** FT-IR Spectral analysis of **1a**, **1a** with  $\text{KO}^t\text{Bu}$  and **2a**.

**Spin-trapping experiment with DMPO.**<sup>4</sup> In a 10 mL quartz tube containing of 1-Benzylquinoxalin-2(1*H*)-one (**1a**) (60 mg, 0.25 mmol, 1.0 equiv), Potassium *tert*-butoxide (0.057 g, 0.51 mmol, 2 equiv) in 3.0 mL wet-DMSO, was charged and followed by DMPO (20  $\mu\text{L}$ ) was added. Then, the quartz tube was sealed by a septum and paraffin tape, and allowed for 2 h at room temperature. Afterward, 300  $\mu\text{L}$  of the uncompleted reaction mixture was quickly taken out of the quartz tube and poured in an EPR tube and immediately around 200  $\mu\text{L}$  of toluene was appended and EPR experiment was done.

## CHARACTERIZATION DATA

**1-Benzylquinoxalin-2(1H)-one (1a).**<sup>5</sup>  $R_f = 0.3$  (20% ethyl acetate/hexane); pale yellow solid;

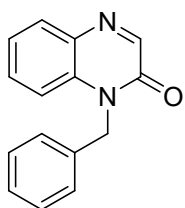

yield 131 mg (81%); mp: 120 °C, <sup>1</sup>H NMR (700 MHz, DMSO-*d*<sub>6</sub>) δ 8.36

(s, 1H), 7.86 (d,  $J = 7.7$  Hz, 1H), 7.56 (t,  $J = 8.0$  Hz, 1H), 7.47 (d,  $J = 8.4$  Hz, 1H), 7.36 (t,  $J = 7.3$  Hz, 1H), 7.32 (t,  $J = 7.3$  Hz, 2H), 7.28 – 7.25 (m,

**1-(4-(*tert*-Butyl)benzyl)quinoxalin-2(1H)-one (1b).**<sup>5</sup>  $R_f = 0.3$  (50% ethyl

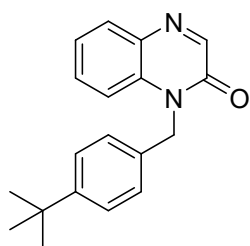

acetate/hexane); dark brown solid; yield 140 mg (70%); mp: 135-136 °C,

<sup>1</sup>H NMR (400 MHz, DMSO-*d*<sub>6</sub>) δ 8.35 (s, 1H), 7.85 (d,  $J = 8.0$  Hz, 1H), 7.57 (t,  $J = 7.8$  Hz, 1H), 7.50 (d,  $J = 8.0$  Hz, 1H), 7.36 (d,  $J = 7.6$  Hz, 1H), 7.32 (d,  $J = 8.4$  Hz, 2H), 7.20 (d,  $J = 8.0$  Hz, 2H), 5.44 (s, 2H), 1.21 (s,

**1-(4-Isopropylbenzyl)quinoxalin-2(1H)-one (1c).**<sup>5</sup>  $R_f = 0.3$  (20% ethyl acetate/hexane); dark

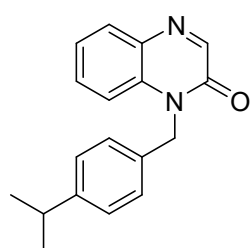

brown solid; yield 137 mg (72%); mp: 131 °C, <sup>1</sup>H NMR (400 MHz,

DMSO-*d*<sub>6</sub>) δ 8.35 (s, 1H), 7.85 (d,  $J = 7.6$  Hz, 1H), 7.57 (t,  $J = 7.4$  Hz, 1H), 7.50 (d,  $J = 8.0$  Hz, 1H), 7.35 (d,  $J = 7.4$  Hz, 1H), 7.20-7.16 (m, 4H), 2.84 – 2.79 (m, 1H), 1.14 (d,  $J = 6.8$  Hz, 6H).

**1-(4-Methylbenzyl)quinoxalin-2(1H)-one (1d).**<sup>5</sup>  $R_f = 0.6$  (20% ethyl acetate/hexane); pale

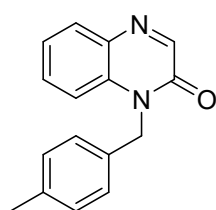

yellow solid; yield 120 mg (70%); mp: 167-169 °C, <sup>1</sup>H NMR (400 MHz,

DMSO-*d*<sub>6</sub>) δ 8.35 (s, 1H), 7.86 (d,  $J = 8.0$  Hz, 1H), 7.57 (d,  $J = 7.2$  Hz, 1H), 7.46 (d,  $J = 7.6$  Hz, 1H), 7.35 (t,  $J = 7.0$  Hz, 1H), 7.17 (d,  $J = 8.4$  Hz, 2H), 7.11 (d,  $J = 8.0$  Hz, 2H), 5.44 (s, 2H), 2.24 (s, 3H).

**1-(4-(Trifluoromethyl)benzyl)quinoxalin-2(1H)-one (1e).**<sup>5</sup>  $R_f = 0.2$  (20% ethyl

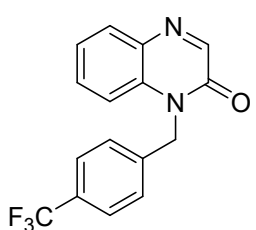

acetate/hexane); dark brown solid; yield 135 mg (65%); mp: 109-111 °C,

<sup>1</sup>H NMR (700 MHz, DMSO-*d*<sub>6</sub>) δ 8.36 (s, 1H), 7.86 (d,  $J = 8.4$  Hz, 1H),

7.67 (d,  $J = 8.4$  Hz, 2H), 7.57 – 7.54 (t,  $J = 8.0$  Hz 1H), 7.48 (d,  $J = 8.4$  Hz, 2H), 7.43 (d,  $J = 8.4$  Hz, 1H), 7.36 (t,  $J = 7.3$  Hz, 1H), 5.57 (s, 2H).

**1-(4-Fluorobenzyl)quinoxalin-2(1H)-one (1f).**<sup>5</sup>  $R_f = 0.5$  (20% ethyl acetate/hexane); pale

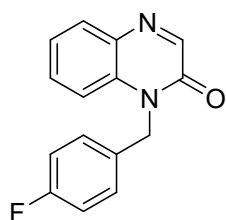

yellow solid; yield 96 mg (55%); mp: 115 °C, <sup>1</sup>H NMR (400 MHz, DMSO- $d_6$ )  $\delta$  8.35 (s, 1H), 7.85 (d,  $J = 7.6$  Hz, 1H), 7.57 (t,  $J = 8.4$  Hz, 1H), 7.48 (d,  $J = 7.6$  Hz, 1H), 7.37 (d,  $J = 8.0$  Hz, 1H), 7.34 (d,  $J = 5.6$  Hz, 2H), 7.15 (t,  $J = 8.8$  Hz, 2H), 5.47 (s, 2H).

**1-(3,5-Difluorobenzyl)quinoxalin-2(1H)-one (1g).**<sup>5</sup>  $R_f = 0.2$  (20% ethyl acetate/hexane);

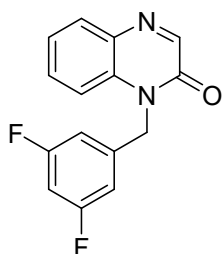

light brown solid; yield 123 mg (66%); mp: 142-144 °C, <sup>1</sup>H NMR (400 MHz, DMSO- $d_6$ )  $\delta$  8.34 (s, 1H), 7.86 (d,  $J = 8.0$  Hz, 1H), 7.59 (t,  $J = 7.8$  Hz, 1H), 7.41 (d,  $J = 8.0$  Hz, 1H), 7.38 (t,  $J = 7.6$  Hz, 1H), 7.14 (t,  $J = 9.4$  Hz, 1H), 7.06 (d,  $J = 6.4$  Hz, 2H), 5.48 (s, 2H).

**1-(4-Bromobenzyl)quinoxalin-2(1H)-one (1h).**<sup>5</sup>  $R_f = 0.4$  (20% ethyl acetate/hexane); light

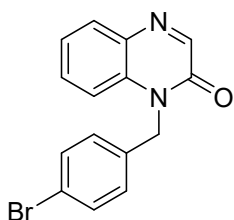

yellow solid; yield 147 mg (68%); mp: 170-173 °C, <sup>1</sup>H NMR (700 MHz, DMSO- $d_6$ )  $\delta$  8.35 (s, 1H), 7.86 (d,  $J = 7.7$  Hz, 1H), 7.57 (t,  $J = 8.1$  Hz, 1H), 7.51 (d,  $J = 8.3$  Hz, 2H), 7.45 (d,  $J = 8.4$  Hz, 1H), 7.37 (t,  $J = 7.3$  Hz, 1H), 7.25 (d,  $J = 8.4$  Hz, 2H), 5.46 (s, 2H).

**1-Ethylquinoxalin-2(1H)-one (1i).**<sup>5</sup>  $R_f = 0.4$  (20% ethyl acetate/hexane); pinkish white solid;

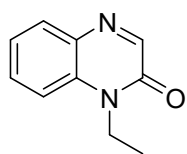

yield 85 mg (70%); mp: 81-83 °C, <sup>1</sup>H NMR (400 MHz, DMSO- $d_6$ )  $\delta$  8.23 (s, 1H), 7.84 (d,  $J = 7.6$  Hz, 1H), 7.70 – 7.67 (m, 1H), 7.65 (d,  $J = 5.8$  Hz, 1H), 7.41 – 7.37 (m, 1H), 4.25 (q,  $J = 7.1$  Hz, 2H), 1.23 (t,  $J = 7.1$  Hz, 3H).

**1-Butylquinoxalin-2(1H)-one (1j).**<sup>5</sup>  $R_f = 0.3$  (20% ethyl acetate/hexane); pale yellow

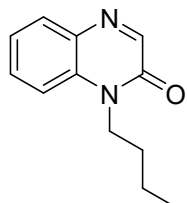

liquid; yield 97 mg (70%); <sup>1</sup>H NMR (700 MHz, DMSO- $d_6$ )  $\delta$  8.22 (s, 1H), 7.83 (d,  $J = 7.7$  Hz, 1H), 7.66 (t,  $J = 7.7$  Hz, 1H), 7.62 (d,  $J = 8.4$  Hz, 1H),



7.38 (t,  $J = 7.7$  Hz, 1H), 4.20 (t,  $J = 7.7$  Hz, 2H), 1.64 – 1.58 (m, 2H), 1.41 – 1.35 (m, 2H), 0.92 (t,  $J = 7.4$  Hz, 3H).

**1-Phenethylquinoxalin-2(1H)-one (1k).**<sup>5</sup>  $R_f = 0.5$  (20% ethyl acetate/hexane); yellow solid;

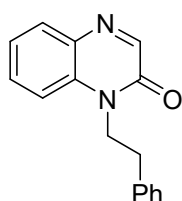

yield 111 mg (65%); mp: 132-134 °C, <sup>1</sup>H NMR (700 MHz, DMSO-*d*<sub>6</sub>) δ 8.24 (s, 1H), 7.85 (d,  $J = 7.7$  Hz, 1H), 7.69 (d,  $J = 8.4$  Hz, 1H), 7.66 (d,  $J = 7.0$  Hz, 1H), 7.39 (t,  $J = 7.0$  Hz, 1H), 7.30 (d,  $J = 4.2$  Hz, 4H), 7.24 – 7.22 (m, 1H), 4.44 – 4.41 (t,  $J = 7.7$  Hz, 2H), 2.96 – 2.93 (t,  $J = 8.1$  Hz, 2H).

**1-(Prop-2-yn-1-yl)quinoxalin-2(1H)-one (1l).**<sup>5</sup>  $R_f = 0.2$  (20% ethyl acetate/hexane); light

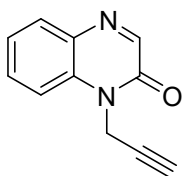

brown solid; yield 92 mg (73%); mp: 177-179 °C, <sup>1</sup>H NMR (400 MHz, DMSO-*d*<sub>6</sub>) δ 8.29 (s, 1H), 7.87 (d,  $J = 7.6$  Hz, 1H), 7.72 (t,  $J = 7.8$  Hz, 1H), 7.65 (d,  $J = 8.0$  Hz, 1H), 7.43 (t,  $J = 7.4$  Hz, 1H), 5.07 (d,  $J = 2.4$  Hz, 2H), 3.36 (t,  $J = 2.5$  Hz, 1H).

**1-Benzylbenzo[*g*]quinoxalin-2(1H)-one (1m).**<sup>5</sup>  $R_f = 0.4$  (20% ethyl acetate/hexane); dark

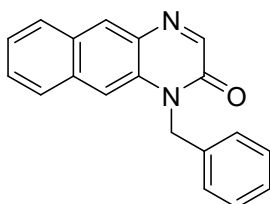

brown solid; yield 147 mg (75%); mp: 194-196 °C, <sup>1</sup>H NMR (700 MHz, DMSO-*d*<sub>6</sub>) δ 8.51 (s, 1H), 8.40 (s, 1H), 8.10 (d,  $J = 8.4$  Hz, 1H), 7.92 (t,  $J = 7.0$  Hz, 2H), 7.58 (t,  $J = 7.4$  Hz, 1H), 7.51 (t,  $J = 7.3$  Hz, 1H), 7.37 (d,  $J = 7.7$  Hz, 2H), 7.32 (t,  $J = 7.7$  Hz, 2H), 7.25 (t,  $J = 7.0$  Hz, 1H), 5.55 (s, 2H).

**1-Benzyl-6,7-dimethylquinoxalin-2(1H)-one (1n).**<sup>5</sup>  $R_f = 0.3$  (20% ethyl acetate/hexane);

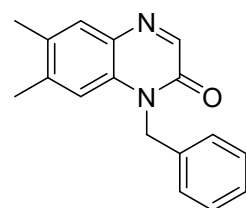

white solid; yield 118 mg (65%); mp: 179-182 °C, <sup>1</sup>H NMR (400 MHz, DMSO-*d*<sub>6</sub>) δ 8.25 (s, 1H), 7.63 (s, 1H), 7.33 (s, 1H), 7.31 (d,  $J = 6.4$  Hz, 2H), 7.25 (d,  $J = 7.3$  Hz, 3H), 5.46 (s, 2H), 2.28 (s, 3H), 2.27 (s, 3H).

**1-Benzyl-6,7-dichloroquinoxalin-2(1H)-one (1o).**<sup>5</sup>  $R_f = 0.4$  (20% ethyl acetate/hexane); pink

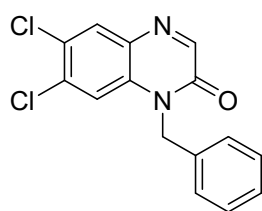

solid; yield 115 mg (55%); mp: 179 °C, <sup>1</sup>H NMR (400 MHz, DMSO-*d*<sub>6</sub>) δ 8.40 (s, 1H), 8.14 (s, 1H), 7.76 (s, 1H), 7.35 – 7.31 (m, 2H), 7.28-7.26 (m, 3H), 5.48 (s, 2H).

**1-Benzyl-6,7-difluoroquinoxalin-2(1H)-one (1p).**<sup>5</sup>  $R_f = 0.7$  (20% ethyl acetate/hexane); light

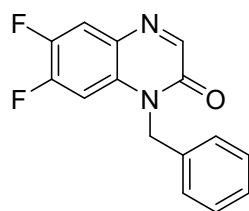

pink solid; yield 121 mg (65%); mp: 146 °C, <sup>1</sup>H NMR (700 MHz, DMSO-*d*<sub>6</sub>) δ 8.37 (s, 1H), 8.03 – 7.98 (m, 1H), 7.63 (dd,  $J = 12.3, 7.3$  Hz, 1H), 7.33 (t,  $J = 7.7$  Hz, 2H), 7.29 (d,  $J = 7.7$  Hz, 2H), 7.26 (d,  $J = 7.0$  Hz, 1H), 5.46 (s, 2H).

**1-(4-(*tert*-Butyl)benzyl)-6,7-dichloroquinoxalin-2(1H)-one (1q).**<sup>5</sup>  $R_f = 0.3$  (20% ethyl

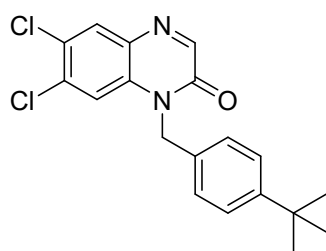

acetate/hexane); light yellowish brown solid; yield 173 mg (70%); mp: 160-162 °C, <sup>1</sup>H NMR (400 MHz, DMSO-*d*<sub>6</sub>) δ 8.39 (s, 1H), 8.14 (s, 1H), 7.83 (s, 1H), 7.34 (d,  $J = 8.4$  Hz, 2H), 7.20 (d,  $J = 8.3$  Hz, 2H), 5.44 (s, 2H), 1.23 (s, 9H). <sup>13</sup>C NMR (100 MHz, DMSO-

*d*<sub>6</sub>) δ 154.0, 152.1, 149.9, 133.3, 132.4, 132.4, 132.2, 130.6, 126.6, 126.3, 125.5, 116.8, 44.3, 34.2, 31.0;  $\tilde{\nu} = 2960, 1667, 1593, 841 \text{ cm}^{-1}$ ; HRMS (ESI/QTOF)  $m/z$ :  $[M + H]^+$  calcd for C<sub>19</sub>H<sub>19</sub>Cl<sub>2</sub>N<sub>2</sub>O 361.0874; Found 361.0868.

**1-Benzyl-6-methylquinoxalin-2(1H)-one and 1-Benzyl-7-methylquinoxalin-2(1H)-one**

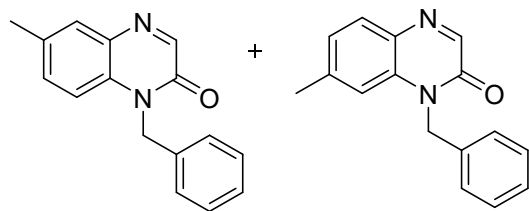

**(1r).**<sup>5</sup>  $R_f = 0.3$  (20% ethyl acetate/hexane); gray solid; yield 154 mg (75%); mp: 110 °C, two regioisomers with 62:38 ratio; <sup>1</sup>H NMR (700 MHz, DMSO-*d*<sub>6</sub>) δ 8.33 (s, 1H), 8.27 (s, 0.6H), 7.74 (d,

$J = 8.0$  Hz, 0.6H), 7.67 (s, 1H), 7.39-7.35 (m, 2H), 7.33-7.30 (m, 3H), 7.27-7.24 (m, 5H), 7.19 (d,  $J = 7.9$  Hz, 0.6H), 5.47 (s, 4H), 2.37 (s, 6H).

**1-Benzyl-6-bromoquinoxalin-2(1H)-one and 1-Benzyl-7-bromoquinoxalin-2(1H)-one**

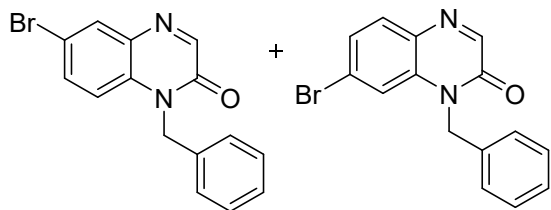

**(1s).**<sup>5</sup>  $R_f = 0.4$  (20% ethyl acetate/hexane); light pink solid; yield 259 mg (60%); mp: 152 °C, two regio-isomers with 59:41 ratio; <sup>1</sup>H NMR (400 MHz, DMSO-  $d_6$ )  $\delta$  8.39 (s, 1H), 8.37 (s, 0.6H),

8.05 (d,  $J = 2.2$  Hz, 1H), 7.78 (d,  $J = 8.5$  Hz, 1H), 7.74 – 7.71 (m, 1H), 7.67 (d,  $J = 1.8$  Hz, 1H), 7.53 (dd,  $J = 8.5, 1.9$  Hz, 1H), 7.41 (d,  $J = 9.0$  Hz, 1H), 7.35-7.30 (m, 5H), 7.28 – 7.24 (m, 5H), 5.48 (d,  $J = 8.7$  Hz, 4H).

**1-Benzyl-6-chloroquinoxalin-2(1H)-one and 1-Benzyl-7-chloroquinoxalin-2(1H)-one**

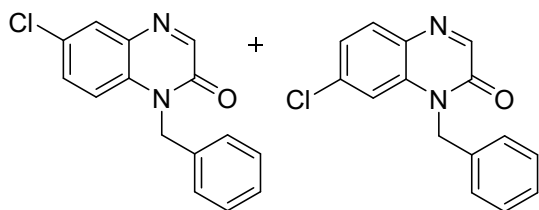

**(1t).**<sup>5</sup>  $R_f = 0.5$  (20% ethyl acetate/hexane); brown solid; yield 230 mg (62%); mp: 140-142 °C, two regio-isomers with 75:25 ratio; <sup>1</sup>H NMR (400 MHz, DMSO-  $d_6$ )  $\delta$  8.40 (s, 1H), 8.36 (s, 0.4H),

7.92 (d,  $J = 2.4$  Hz, 1H), 7.86 (d,  $J = 8.5$  Hz, 0.5H), 7.60-7.62 (m, 1H), 7.54 (d,  $J = 2.0$  Hz, 0.6H), 7.46 (d,  $J = 8.8$  Hz, 1H), 7.38-7.41 (m, 0.6H), 7.30 – 7.33 (m, 4H), 7.26 (d,  $J = 6.3$  Hz, 5H), 5.48 (d,  $J = 6.0$  Hz, 4H).

**1-Benzyl-1,4-dihydroquinoxaline-2,3-dione (2a).**<sup>1a</sup>  $R_f = 0.3$  (50% ethyl acetate/hexane);

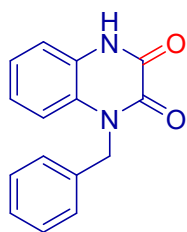

yellow solid; yield 59 mg (92%); mp: 295-297 °C, <sup>1</sup>H NMR (700 MHz, DMSO- $d_6$ )  $\delta$  12.11 (s, 1H), 7.34 – 7.29 (m, 4H), 7.25 (d,  $J = 6.3$  Hz, 1H), 7.19 (dd,  $J = 16.0, 7.7$  Hz, 2H), 7.13 (t,  $J = 7.7$  Hz, 1H), 7.06 (t,  $J = 7.7$  Hz, 1H), 5.38 (s, 2H); <sup>13</sup>C{<sup>1</sup>H} NMR (175 MHz, DMSO- $d_6$ )  $\delta$  155.7, 153.7, 135.8,

128.6, 127.2, 126.7, 126.3, 125.9, 123.6, 123.1, 115.7, 115.4, 45.6.

**1-(4-(*tert*-Butyl)benzyl)-1,4-dihydroquinoxaline-2,3-dione (2b).**<sup>1a</sup>  $R_f = 0.2$  (50% ethyl acetate/hexane); yellow solid; yield 56 mg (89%); mp: >300 °C; <sup>1</sup>H NMR

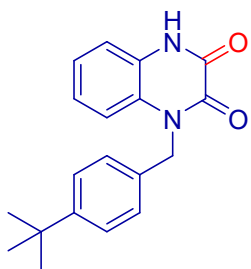

(700 MHz, DMSO-*d*<sub>6</sub>) δ 12.11 (s, 1H), 7.33 (d,  $J = 7.7$  Hz, 2H), 7.22 (d,  $J = 7.7$  Hz, 1H), 7.20 (d,  $J = 7.7$  Hz, 1H), 7.13 (t,  $J = 7.7$  Hz, 1H), 7.08 (t,  $J = 8.4$  Hz, 1H), 5.33 (s, 2H), 1.23 (s, 9H); <sup>13</sup>C{<sup>1</sup>H} NMR (175 MHz, DMSO-*d*<sub>6</sub>) δ 155.5, 153.6, 149.5, 132.6, 126.4, 126.2, 125.8, 125.3, 123.6,

123.1, 115.6, 115.4, 45.1, 34.1, 31.0.

**1-(4-Isopropylbenzyl)-1,4-dihydroquinoxaline-2,3-dione (2c).**<sup>1a</sup>  $R_f = 0.3$  (50% ethyl

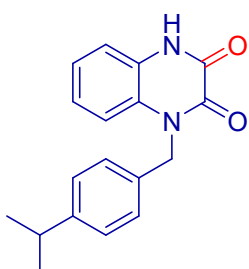

acetate/hexane); yellow solid; yield 53 mg (84%); mp: 271-273 °C; <sup>1</sup>H NMR (700 MHz, DMSO-*d*<sub>6</sub>) δ 12.11 (s, 1H), 7.22-7.17 (m, 6H), 7.13 (t,  $J = 7.7$  Hz, 1H), 7.07 (t,  $J = 7.7$  Hz, 1H), 5.33 (s, 2H), 2.85-2.81 (m, 1H), 1.15 (d,  $J = 7.0$  Hz, 6H); <sup>13</sup>C{<sup>1</sup>H} NMR (175 MHz, DMSO-*d*<sub>6</sub>) δ

155.7, 153.7, 147.4, 133.1, 126.8, 126.6, 126.3, 125.9, 123.7, 123.2, 115.7, 115.5, 45.4, 33.1, 23.9.

**1-(4-Methylbenzyl)-1,4-dihydroquinoxaline-2,3-dione (2d).**<sup>1a</sup>  $R_f = 0.3$  (50% ethyl

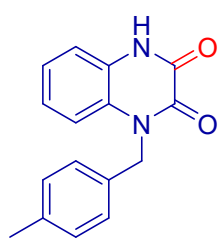

acetate/hexane); yellow solid; yield 49 mg (77%); mp: >300 °C; <sup>1</sup>H NMR (700 MHz, DMSO-*d*<sub>6</sub>) δ 12.10 (s, 1H), 7.19-7.16 (m, 4H), 7.12 (t,  $J = 7.7$  Hz, 3H), 7.06 (t,  $J = 7.7$  Hz, 1H), 5.33 (s, 2H), 2.25 (s, 3H); <sup>13</sup>C{<sup>1</sup>H} NMR (175 MHz, DMSO-*d*<sub>6</sub>) δ 155.6, 153.6, 136.3, 132.6, 129.1, 126.6, 126.1,

125.8, 123.5, 123.0, 115.6, 115.4, 45.3, 20.5.

**1-(4-(Trifluoromethyl)benzyl)-1,4-dihydroquinoxaline-2,3-dione (2e).**<sup>1a</sup>  $R_f = 0.3$  (50%

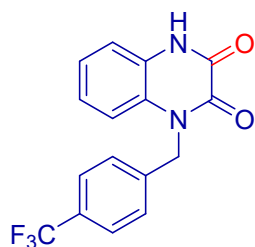

ethyl acetate/hexane); pale yellow solid; yield 54 mg (84%); mp: 266-268 °C; <sup>1</sup>H NMR (700 MHz, DMSO-*d*<sub>6</sub>) δ 12.12 (s, 1H), 7.68 (d,  $J = 8.4$  Hz, 2H), 7.55 (d,  $J = 7.7$  Hz, 2H), 7.21 (d,  $J = 7.7$  Hz, 1H), 7.14 (t,  $J =$

7.7 Hz, 2H), 7.06 (t,  $J = 7.7$  Hz, 1H), 5.47 (s, 2H);  $^{13}\text{C}\{^1\text{H}\}$  NMR (175 MHz, DMSO- $d_6$ )  $\delta$  155.8, 153.7, 140.7, 127.9 (q,  $^2J_{\text{C-F}} = 31.5$  Hz) 127.5, 126.2, 126.0, 125.6 (q,  $^3J_{\text{C-F}} = 3.7$  Hz), 124.3 (q,  $^1J_{\text{C-F}} = 270.2$  Hz), 123.8, 123.2, 115.8, 115.3, 45.4.

**4-(4-Fluorobenzyl)-3,4-dihydroquinoxalin-2(1H)-one (2f).**<sup>1a</sup>  $R_f = 0.2$  (50% ethyl

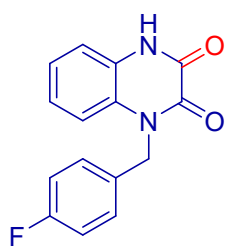

acetate/hexane); pale yellow solid; yield 53 mg (82%); mp: >300 °C;  $^1\text{H}$

NMR (700 MHz, DMSO- $d_6$ )  $\delta$  12.09 (s, 1H), 7.40 – 7.34 (m, 2H), 7.19

(t,  $J = 7.7$  Hz, 2H), 7.16 – 7.12 (m, 3H), 7.07 (t,  $J = 7.7$  Hz, 1H), 5.35 (s,

2H);  $^{13}\text{C}\{^1\text{H}\}$  NMR (175 MHz, DMSO- $d_6$ )  $\delta$  161.5 (d,  $^1J_{\text{C-F}} = 241.5$  Hz),

155.9, 153.8, 132.07 (d,  $^4J_{\text{C-F}} = 2.6$  Hz), 129.0 (d,  $^3J_{\text{C-F}} = 8.2$  Hz), 126.3, 126.1, 123.8, 123.2,

115.8, 115.6 (d,  $^2J_{\text{C-F}} = 21.3$  Hz), 115.5 45.1.

**1-(3,5-Difluorobenzyl)-1,4-dihydroquinoxaline-2,3-dione (2g).**<sup>1a</sup>  $R_f = 0.2$  (50% ethyl

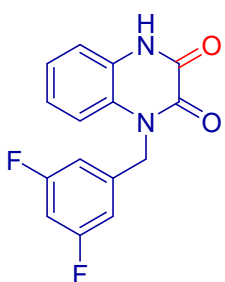

acetate/hexane); pale yellow solid; yield 52 mg (82%); mp: 274-276 °C;

$^1\text{H}$  NMR (700 MHz, DMSO- $d_6$ )  $\delta$  12.04 (s, 1H), 7.20 (d,  $J = 7.7$  Hz, 1H),

7.15 – 7.11 (m, 4H), 7.09-7.07 (m, 2H), 5.37 (s, 2H);  $^{13}\text{C}\{^1\text{H}\}$  NMR (175

MHz, DMSO- $d_6$ )  $\delta$  162.6 (dd,  $J = 246.2, 12.6$  Hz), 155.9, 153.8, 140.7 (t,

$J = 9.3$  Hz), 126.3, 126.2, 123.6, 123.0, 115.7, 115.1, 110.01 (dd,  $J = 21.0, 4.5$  Hz), 102.70 (t,

$J = 25.7$  Hz), 45.2

**4-(4-Bromobenzyl)-3,4-dihydroquinoxalin-2(1H)-one (2h).**<sup>1a</sup>  $R_f = 0.2$  (50% ethyl

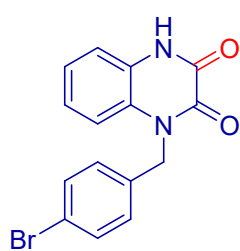

acetate/hexane); yellow solid; yield 55 mg (87%); mp: 281-283 °C;  $^1\text{H}$

NMR (700 MHz, DMSO- $d_6$ )  $\delta$  12.10 (s, 1H), 7.50 (d,  $J = 8.4$  Hz, 2H),

7.28 (d,  $J = 8.4$  Hz, 2H), 7.22 – 7.18 (m, 1H), 7.14 (t,  $J = 7.7$  Hz, 2H),

7.10 – 7.04 (m, 1H), 5.34 (s, 2H);  $^{13}\text{C}\{^1\text{H}\}$  NMR (175 MHz, DMSO- $d_6$ )  $\delta$

155.8, 153.7, 135.3, 131.6, 129.1, 126.2, 126.0, 123.8, 123.2, 120.4, 115.8, 115.4, 45.1.

**1-Ethyl-1,4-dihydroquinoxaline-2,3-dione (2i).**<sup>1a</sup>  $R_f = 0.1$  (50% ethyl acetate/hexane); pale

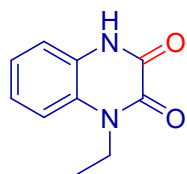

yellow solid; yield 54 mg (84%); mp: 282-284 °C; <sup>1</sup>H NMR (700 MHz, DMSO-*d*<sub>6</sub>) δ 12.02 (s, 1H), 7.40 (d, *J* = 7.7 Hz, 1H), 7.20-7.16 (m, 3H), 4.16-4.13 (m, 2H), 1.21 (t, *J* = 7.0 Hz, 3H); <sup>13</sup>C{<sup>1</sup>H} NMR (175 MHz, DMSO-*d*<sub>6</sub>)

δ 154.8, 153.6, 125.9, 125.8, 123.5, 123.4, 115.8, 114.8, 37.3, 12.0.

**1-Butyl-1,4-dihydroquinoxaline-2,3-dione (2j).**<sup>1a</sup>  $R_f = 0.2$  (50% ethyl acetate/hexane);

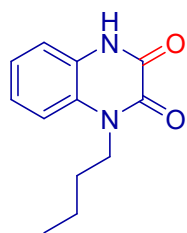

yellow solid; yield 55 mg (85%); mp: 183-185 °C; <sup>1</sup>H NMR (700 MHz, DMSO-*d*<sub>6</sub>) δ 12.02 (s, 1H), 7.37 (d, *J* = 8.4 Hz, 1H), 7.19-7.15 (m, 3H), 4.12 – 4.06 (m, 2H), 1.62-1.57 (m, 2H), 1.41-1.35 (m, 2H), 0.92 (t, *J* = 7.7 Hz, 3H); <sup>13</sup>C{<sup>1</sup>H} NMR (175 MHz, DMSO-*d*<sub>6</sub>) δ 155.0, 153.6, 126.1, 125.8, 123.5,

123.3, 115.8, 114.9, 41.9, 28.6, 19.6, 13.7.

**1-Phenethyl-1,4-dihydroquinoxaline-2,3-dione (2k).**<sup>1a</sup>  $R_f = 0.1$  (50% ethyl acetate/hexane);

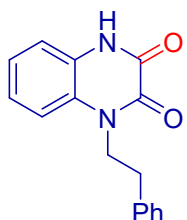

pale yellow solid; yield 49 mg (72%); mp: 228-230 °C; <sup>1</sup>H NMR (700 MHz, DMSO-*d*<sub>6</sub>) δ 12.04 (s, 1H), 7.45 (d, *J* = 7.7 Hz, 1H), 7.31 (d, *J* = 4.2 Hz, 4H), 7.25 – 7.16 (m, 4H), 4.32 – 4.27 (m, 2H), 2.93 – 2.89 (m, 2H); <sup>13</sup>C{<sup>1</sup>H} NMR (175 MHz, DMSO-*d*<sub>6</sub>) δ 155.1, 153.6, 138.2, 128.9, 128.6, 126.6, 126.1,

125.8, 123.7, 123.5, 115.9, 115.0, 43.6, 32.5.

**1-(Prop-2-yn-1-yl)-1,4-dihydroquinoxaline-2,3-dione (2l).**<sup>1a</sup>  $R_f = 0.2$  (50% ethyl acetate/hexane); yellow solid; yield 45 mg (70%); mp 279-281 °C; <sup>1</sup>H NMR

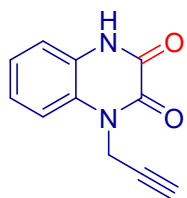

(700 MHz, DMSO-*d*<sub>6</sub>) δ 12.11 (s, 1H), 7.42 (d, *J* = 7.0 Hz, 1H), 7.21 (s, 3H), 4.95 (s, 2H), 3.31 (s, 1H); <sup>13</sup>C{<sup>1</sup>H} NMR (175 MHz, DMSO-*d*<sub>6</sub>) δ 154.7, 153.4, 125.8, 125.6, 124.0, 123.3, 115.8, 115.4, 78.1, 75.1, 32.0.

**4-Benzyl-3,4-dihydrobenzo[g]quinoxalin-2(1H)-one (2m).**<sup>5</sup>  $R_f = 0.4$  (50% ethyl

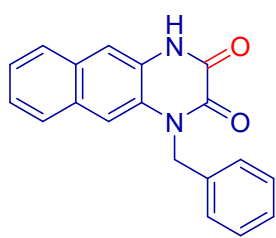

acetate/hexane); yellow solid; yield 58 mg (92%); mp: >300 °C; <sup>1</sup>H NMR (700 MHz, DMSO-*d*<sub>6</sub>) δ 12.28 (s, 1H), 7.82 (d, *J* = 8.4 Hz, 1H), 7.77 (d, *J* = 8.4 Hz, 1H), 7.69 (s, 1H), 7.60 (s, 1H), 7.41-7.38 (m, 3H), 7.36 (d, *J* = 7.0 Hz, 1H), 7.33 (t, *J* = 7.7 Hz, 2H), 7.25 (t, *J* = 7.0 Hz, 1H), 5.48 (s, 2H); <sup>13</sup>C{<sup>1</sup>H} NMR (175 MHz, DMSO-*d*<sub>6</sub>) δ 155.4, 153.5, 135.7, 129.3, 129.2, 128.6, 127.3, 127.2, 126.9, 126.8, 126.4, 126.2, 125.7, 125.1, 112.1, 111.4, 45.8.

**1-Benzyl-6,7-dimethyl-1,4-dihydroquinoxaline-2,3-dione (3a).**<sup>1a</sup>  $R_f = 0.2$  (50% ethyl

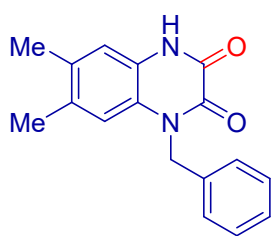

acetate/hexane); yellow solid; yield 50 mg (80%); mp: >300 °C; <sup>1</sup>H NMR (700 MHz, DMSO-*d*<sub>6</sub>) δ 12.00 (s, 1H), 7.34 – 7.22 (m, 6H), 7.01 (s, 1H), 6.95 (s, 1H), 5.34 (s, 2H), 2.15 (s, 3H), 2.12 (s, 3H); <sup>13</sup>C{<sup>1</sup>H} NMR (175 MHz, DMSO-*d*<sub>6</sub>) δ 155.7, 153.8, 136.0, 132.0, 131.4, 128.7, 127.3, 126.7, 124.2, 123.5, 116.4, 116.2, 45.5, 19.3, 18.8.

**1-Benzyl-6,7-dichloro-1,4-dihydroquinoxaline-2,3-dione (3b).**<sup>1a</sup>  $R_f = 0.4$  (50% ethyl

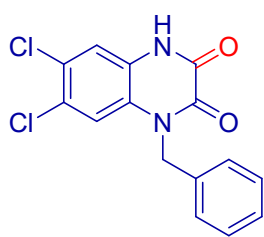

acetate/hexane); yellow solid; yield 55 mg (87%); mp: >300 °C; <sup>1</sup>H NMR (700 MHz, DMSO-*d*<sub>6</sub>) δ 12.23 (s, 1H), 7.37 (s, 1H), 7.35 – 7.29 (m, 5H), 7.26 (t, *J* = 7.0 Hz, 1H), 5.36 (s, 2H); <sup>13</sup>C{<sup>1</sup>H} NMR (175 MHz, DMSO-*d*<sub>6</sub>) δ 155.4, 153.5, 135.2, 128.8, 127.5, 126.8, 126.7, 126.4, 125.3, 124.7, 116.9, 116.5, 45.8.

**1-Benzyl-6,7-difluoro-1,4-dihydroquinoxaline-2,3-dione (3c).**<sup>1a</sup>  $R_f = 0.3$  (50% ethyl

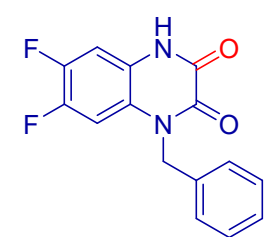

acetate/hexane); pale yellow solid; yield 53 mg (84%); mp 269-271 °C; <sup>1</sup>H NMR (700 MHz, DMSO-*d*<sub>6</sub>) δ 12.17 (s, 1H), 7.36 – 7.28 (m, 5H), 7.28 – 7.23 (m, 2H), 7.17-7.15 (m, 1H), 5.33 (s, 2H); <sup>13</sup>C{<sup>1</sup>H} NMR (175 MHz, DMSO-*d*<sub>6</sub>) δ 155.6, 153.6, 145.4 (dd, *J* = 237.1, 9.8 Hz),

145.1 (dd,  $J = 237.3, 12.2$  Hz), 135.3, 128.9, 127.6, 126.9, 123.3 (d,  $J = 8.4$  Hz), 122.8 (d,  $J = 9.5$  Hz), 105.1 (d,  $J = 23.5$  Hz), 104.4 (d,  $J = 21.9$  Hz), 46.2.

**1-(4-(*tert*-Butyl)benzyl)-6,7-dichloro-1,4-dihydroquinoxaline-2,3-dione (3d).**<sup>5</sup>  $R_f = 0.8$

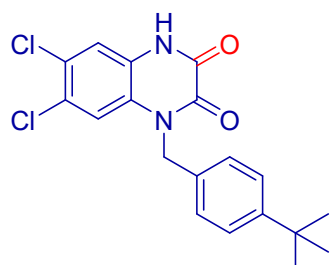

(50% ethyl acetate/hexane); reddish brown solid; yield 59 mg

(82%); mp 283-285 °C; <sup>1</sup>H NMR (700 MHz, DMSO-*d*<sub>6</sub>) δ 12.23 (s,

1H), 7.46 (s, 1H), 7.34-7.24 (m, 5H), 5.32 (s, 2H), 1.24 (s, 9H);

<sup>13</sup>C{<sup>1</sup>H} NMR (175 MHz, DMSO-*d*<sub>6</sub>) δ 155.2, 153.3, 149.8, 132.2,

126.8, 126.5, 126.3, 125.4, 125.2, 124.6, 116.8, 116.4, 45.4, 34.2, 31.1.

**1-Benzyl-6-methyl-1,4-dihydroquinoxaline-2,3-dione and 1-Benzyl-7-methyl-1,4-dihydroquinoxaline-2,3-dione (3e).**<sup>1a</sup>  $R_f = 0.4$  (50% ethyl acetate/hexane); pale yellow

solid; yield 53 mg (83%); mp 259-261 °C; Two regioisomers with 63:37 Ratio; <sup>1</sup>H NMR (700

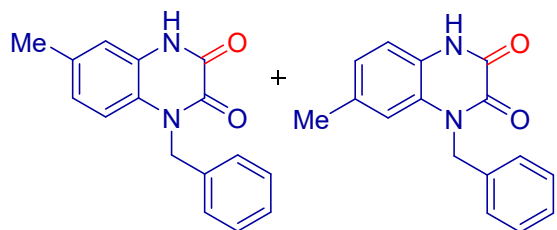

MHz, DMSO-*d*<sub>6</sub>) δ 12.07 (s, 1.6H), 7.33-7.29

(m, 4H), 7.28-7.23 (m, 5H), 7.09 (d,  $J = 7.7$  Hz,

0.6H), 7.04 (d,  $J = 8.4$  Hz, 1H), 7.01 (s, 0.6H),

6.99 (s, 1H), 6.96 (d,  $J = 7.7$  Hz, 0.6H), 6.87 (d,

$J = 8.4$  Hz, 1H), 5.34 (d,  $J = 6.4$  Hz, 3.2H), 2.23 (s, 3H), 2.20 (s, 1.8H); <sup>13</sup>C{<sup>1</sup>H} NMR (175

MHz, DMSO-*d*<sub>6</sub>) δ 156.0, 155.8, 154.1, 153.8, 136.0, 135.9, 133.5, 132.9, 128.9, 128.9, 127.5,

126.9, 126.8, 126.4, 125.8, 124.7, 124.3, 124.2, 123.7, 116.1, 115.9, 115.8, 115.6, 45.8, 45.8,

21.0, 20.5.

**1-Benzyl-6-bromo-1,4-dihydroquinoxaline-2,3-dione and 1-Benzyl-7-bromo-1,4-dihydroquinoxaline-2,3-dione (3f).**<sup>1a</sup>  $R_f = 0.4$  (50% ethyl acetate/hexane); pale yellow

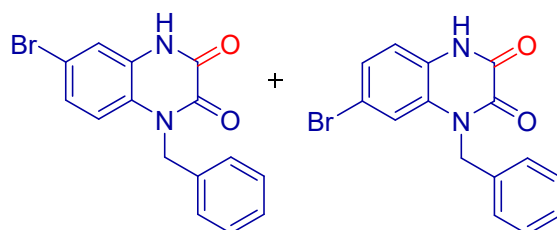

solid; yield 48 mg (76%); mp 256-258 °C; Two

regioisomers with 67:33 Ratio; <sup>1</sup>H NMR (700

MHz, DMSO-*d*<sub>6</sub>) δ 12.19 (s, 1.5H), 7.34 – 7.28



(m, 5H), 7.27 – 7.23 (m, 5H), 7.20 (dd,  $J = 9.1, 1.4$  Hz, 1H), 7.12 (d,  $J = 8.4$  Hz, 0.5H), 7.07 (d,  $J = 9.1$  Hz, 1H), 5.34 (s, 1H), 5.32 (s, 2H);  $^{13}\text{C}\{^1\text{H}\}$  NMR (175 MHz,  $\text{DMSO-}d_6$ )  $\delta$  156.0, 155.8, 154.0, 153.9, 135.6, 135.6, 129.2, 129.1, 128.1, 127.8, 127.8, 127.7, 126.9, 126.9, 126.7, 126.1, 126.0, 125.7, 118.2, 118.2, 117.9, 117.7, 46.2, 46.1.

**1-Benzyl-6-chloro-1,4-dihydroquinoxaline-2,3-dione** and **1-Benzyl-7-chloro-1,4-dihydroquinoxaline-2,3-dione (3g)**.<sup>1a</sup>  $R_f = 0.3$  (50% ethyl acetate/hexane); pale yellow solid;

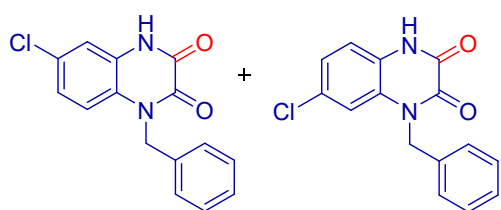

yield 53 mg (84%); mp: 248-250 °C; Two regio isomers with 75:25 Ratio;  $^1\text{H}$  NMR (400 MHz,  $\text{DMSO-}d_6$ )  $\delta$  12.17 (s, 1.3H), 7.37 – 7.22 (m, 7.6H), 7.21-7.17 (m, 2.5H), 7.16 – 7.07 (m, 2H), 5.38 (s,

0.7H), 5.35 (s, 2H);  $^{13}\text{C}\{^1\text{H}\}$  NMR (100 MHz,  $\text{DMSO-}d_6$ )  $\delta$  155.6, 155.4, 153.6, 153.4, 135.4, 135.4, 128.7, 128.6, 127.6, 127.4, 127.3, 127.3, 126.9, 126.6, 125.5, 125.1, 123.4, 122.6, 117.1, 115.1, 114.9, 45.8, 45.6.

**1-(4-(phenylethynyl)benzyl)-1,4-dihydroquinoxaline-2,3-dione (5a)**.<sup>1a</sup>  $R_f = 0.3$  (50% ethyl

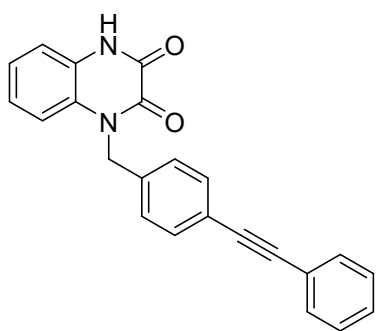

acetate/hexane); pale yellow solid; yield 46 mg (72%); mp: > 300 °C,  $^1\text{H}$  NMR (400 MHz,  $\text{DMSO-}d_6$ )  $\delta$  12.14 (s, 1H), 7.52 (dd,  $J = 12.0, 6.4$  Hz, 4H), 7.41-7.36 (m, 5H), 7.21 (d,  $J = 8.0$  Hz, 1H), 7.14 (t,  $J = 7.6$  Hz, 2H), 7.08 (d,  $J = 7.6$  Hz, 1H), 5.41 (s, 2H).

**1-(3-(p-tolyl)prop-2-yn-1-yl)-1,4-dihydroquinoxaline-2,3-**

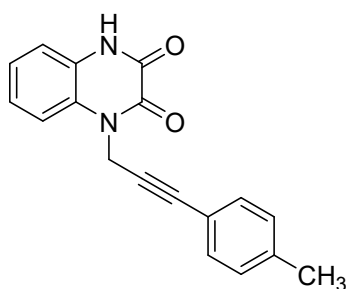

**dione (5b)**.<sup>5</sup>  $R_f = 0.3$  (50% ethyl acetate/hexane); pale yellow solid; yield 57 mg (65%); mp: 293 °C,  $^1\text{H}$  NMR (400 MHz,

DMSO- $d_6$ )  $\delta$  12.12 (s, 1H), 7.52 (d,  $J = 8.0$  Hz, 1H), 7.29 - 7.21 (m, 5H), 7.16 (d,  $J = 7.6$  Hz, 2H), 5.19 (s, 2H), 2.28 (s, 3H).

## NMR SPECTRA

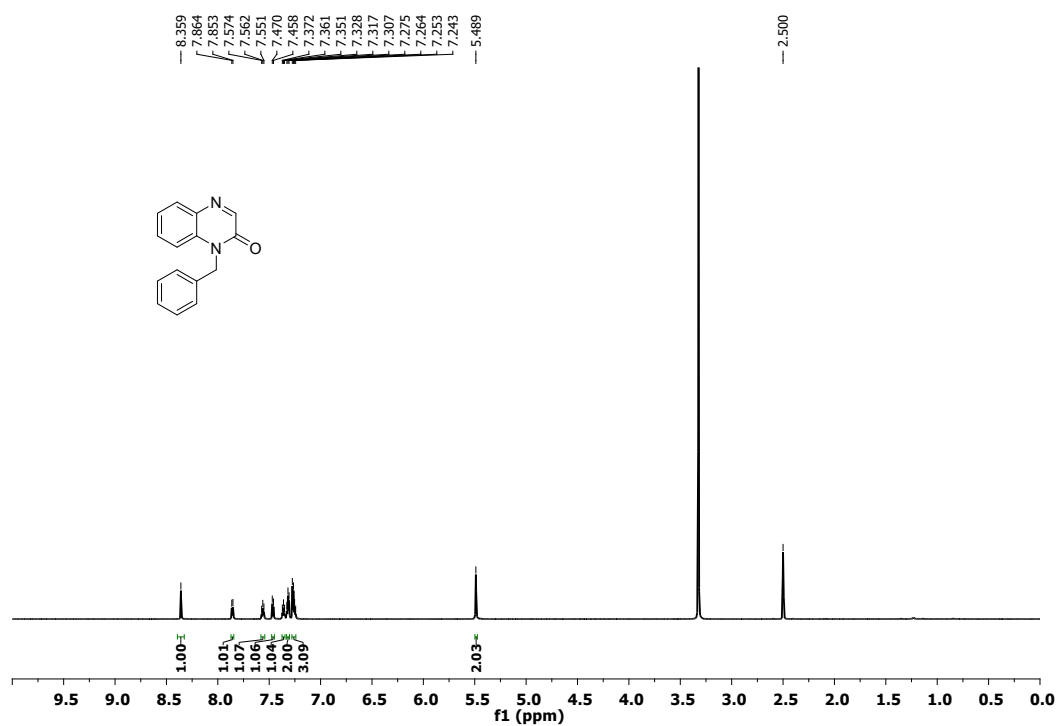

**Figure S17.**  $^1\text{H}$  NMR (700 MHz,  $\text{DMSO-}d_6$ ) spectrum of 1-benzyl-quinoxalin-2(1H)-one  
(1a).

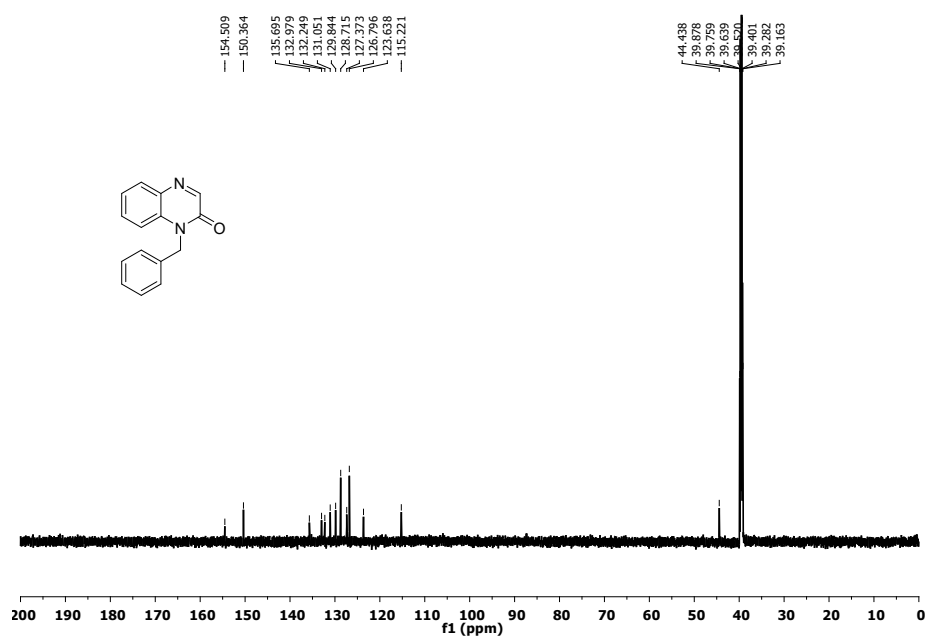

**Figure S18.**  $^{13}\text{C}\{^1\text{H}\}$  NMR (175 MHz,  $\text{DMSO-}d_6$ ) spectrum of 1-benzylquinoxalin-2(1H)-one (1a)

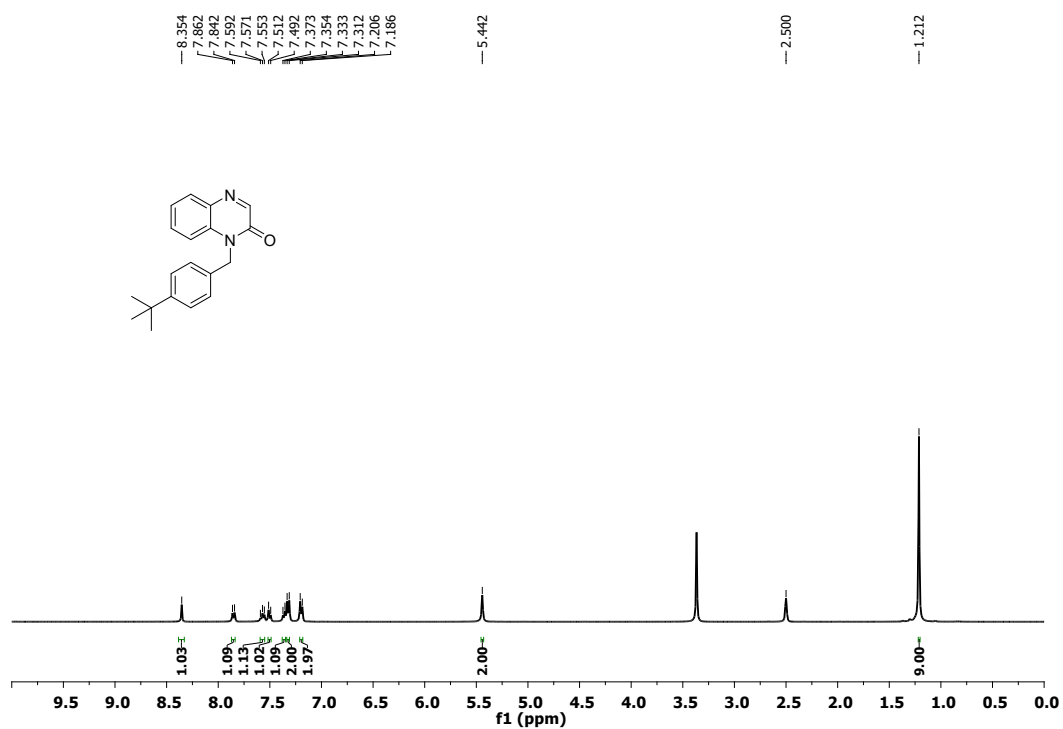

**Figure S19.**  $^1\text{H}$  NMR (400 MHz,  $\text{DMSO-}d_6$ ) spectrum of 1-(4-(*tert*-butyl)benzyl)quinoxalin-2(1*H*)-one (**1b**).

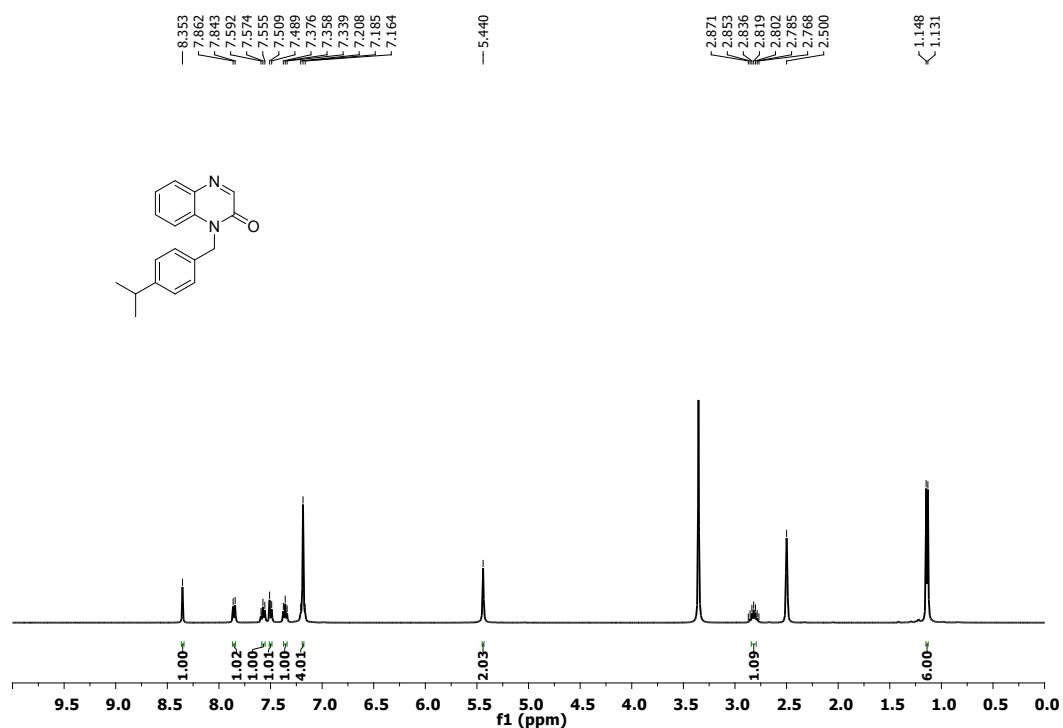

**Figure S20.**  $^1\text{H}$  NMR (400 MHz,  $\text{DMSO-}d_6$ ) spectrum of 1-(4-isopropylbenzyl)quinoxalin-2(1*H*)-one (**1c**).

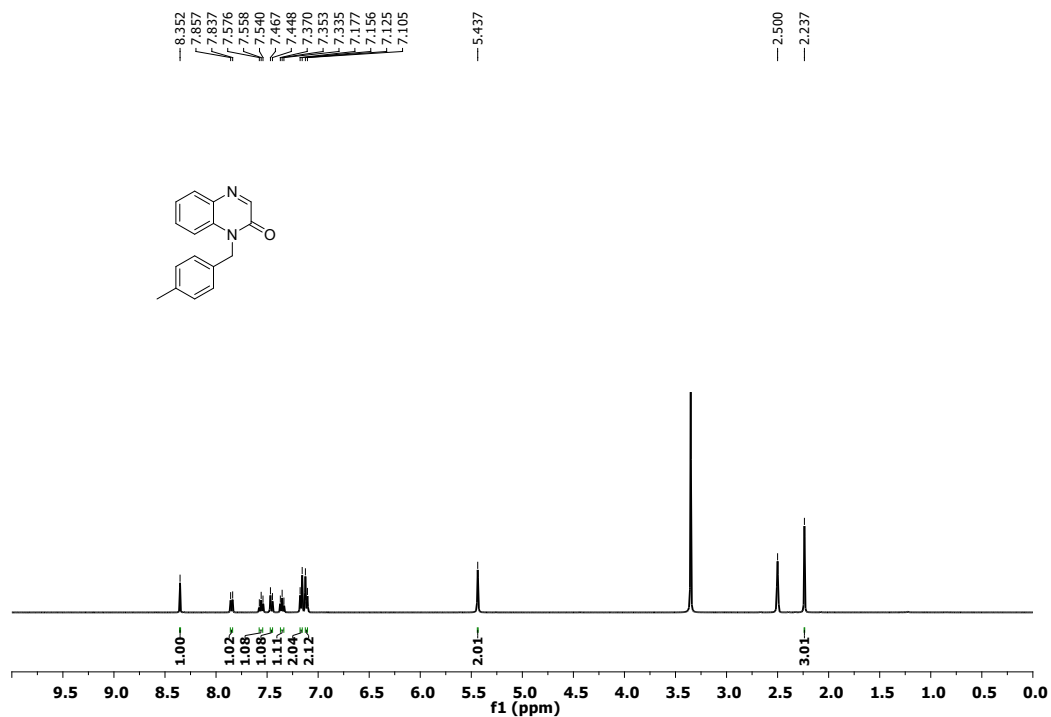

**Figure S21.**  $^1\text{H}$  NMR (400 MHz,  $\text{DMSO-}d_6$ ) spectrum of 1-(4-methylbenzyl)quinoxalin-2(1*H*)-one (**1d**).

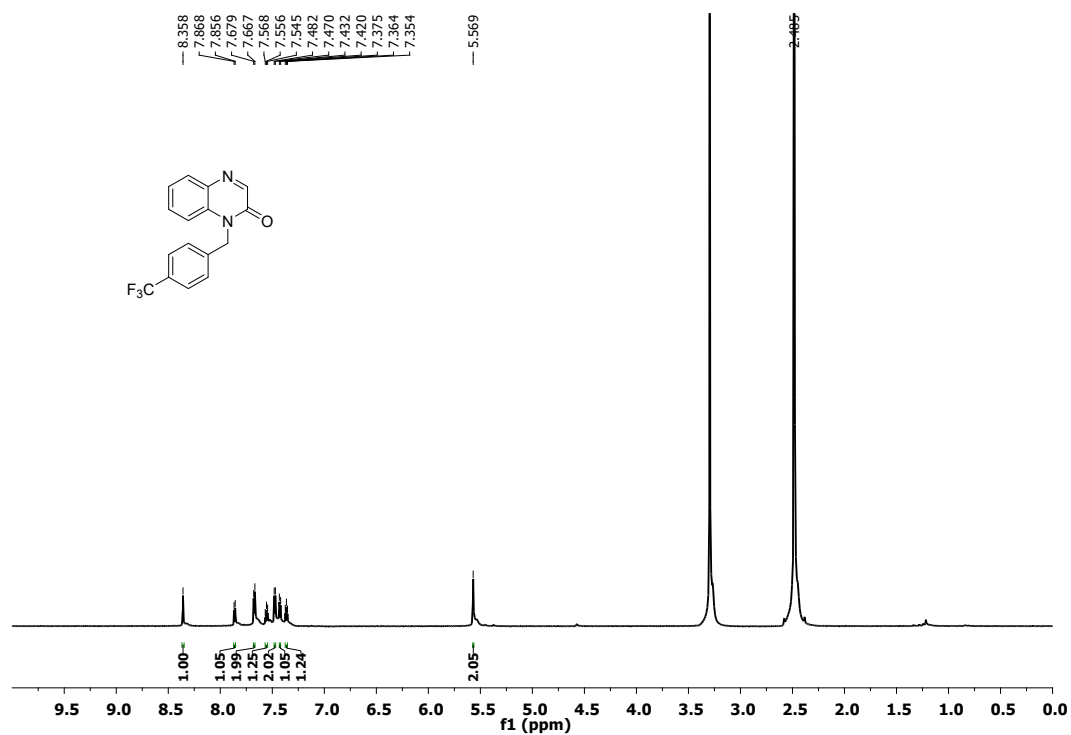

**Figure S22.**  $^1\text{H}$  NMR (700 MHz,  $\text{DMSO-}d_6$ ) spectrum of 1-(4-(trifluoromethyl)benzyl)quinoxalin-2(1*H*)-one (**1e**).

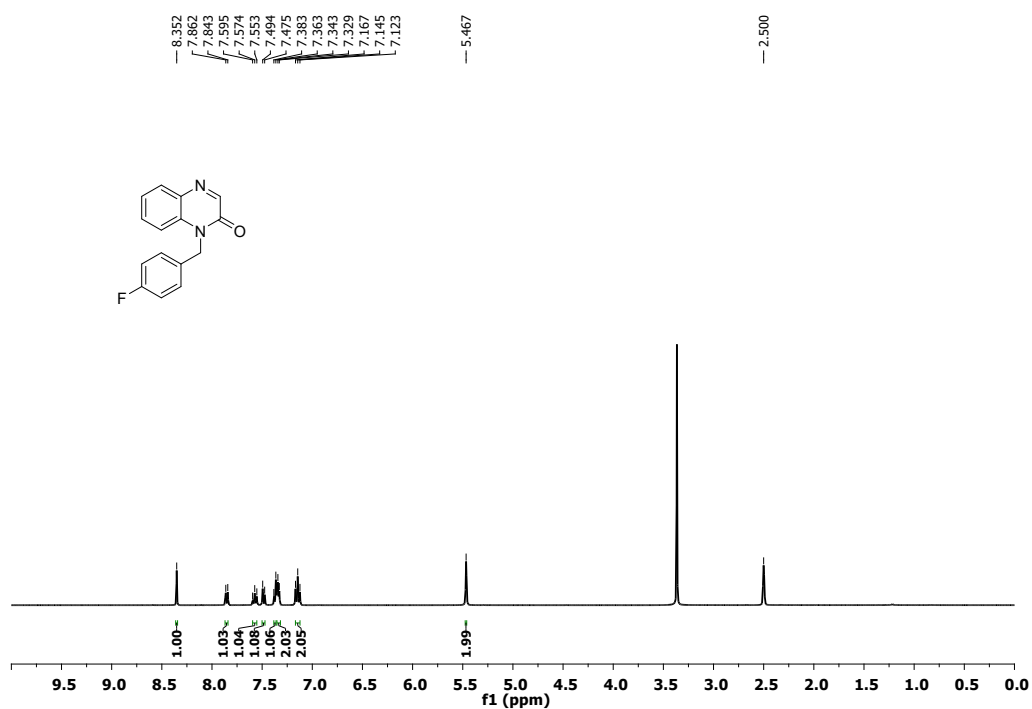

**Figure S23.**  $^1\text{H}$  NMR (400 MHz,  $\text{DMSO-}d_6$ ) spectrum of 1-(4-fluorobenzyl)quinoxalin-2(1*H*)-one (**1f**).

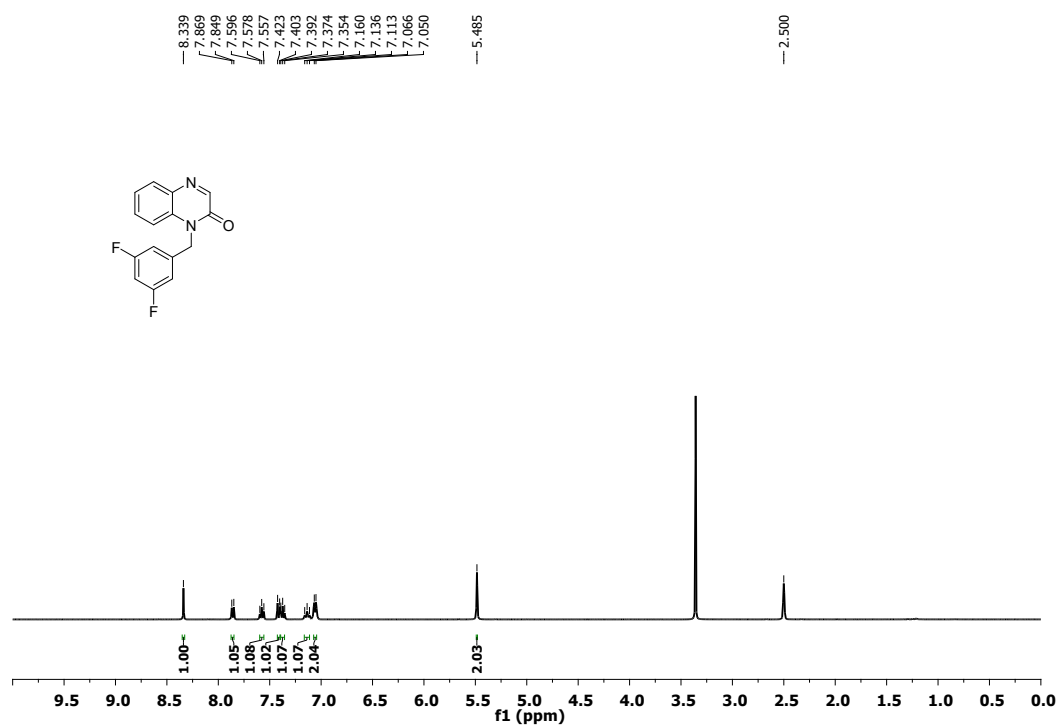

**Figure S24.**  $^1\text{H}$  NMR (700 MHz,  $\text{DMSO-}d_6$ ) spectrum of 1-(3,5-difluorobenzyl)quinoxalin-2(1*H*)-one (**1g**).

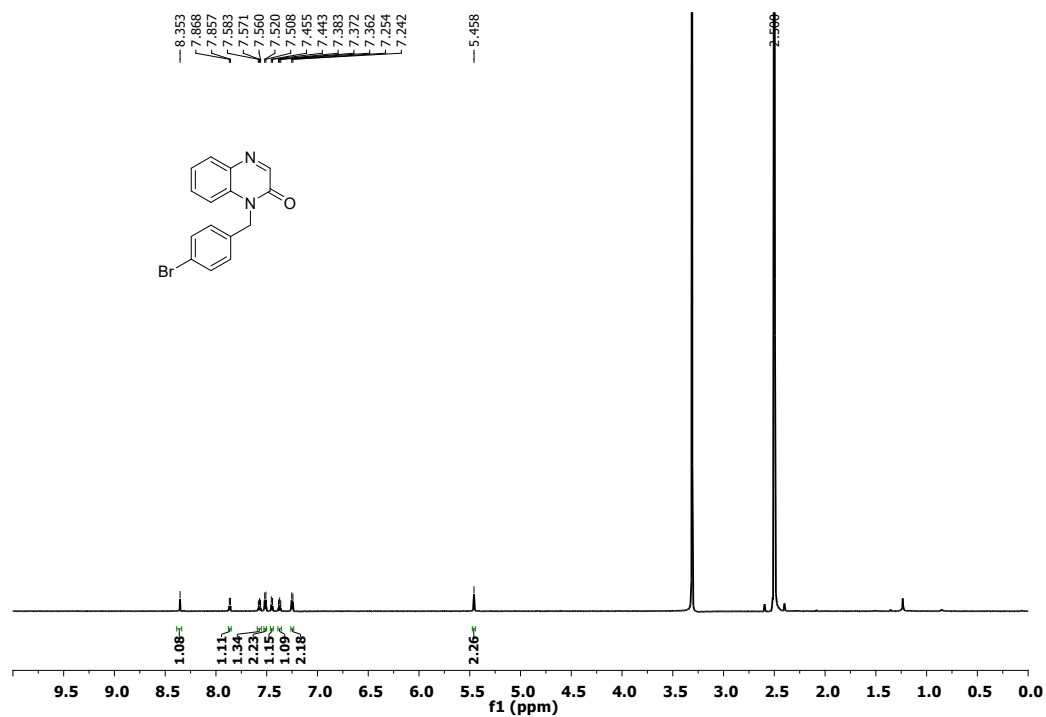

**Figure S25.**  $^1\text{H}$  NMR (700 MHz,  $\text{DMSO-}d_6$ ) spectrum of 1-(4-bromobenzyl)quinoxalin-2(1*H*)-one (**1h**).

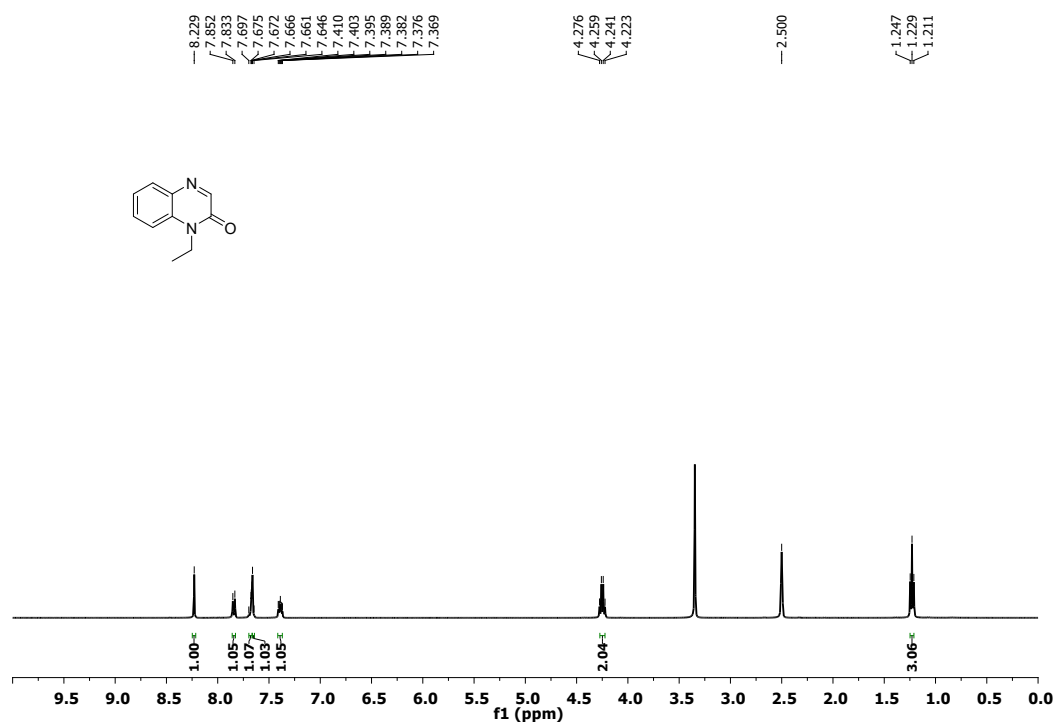

**Figure S26.**  $^1\text{H}$  NMR (400 MHz,  $\text{DMSO-}d_6$ ) spectrum of 1-ethylquinoxalin-2(1*H*)-one (**1i**).

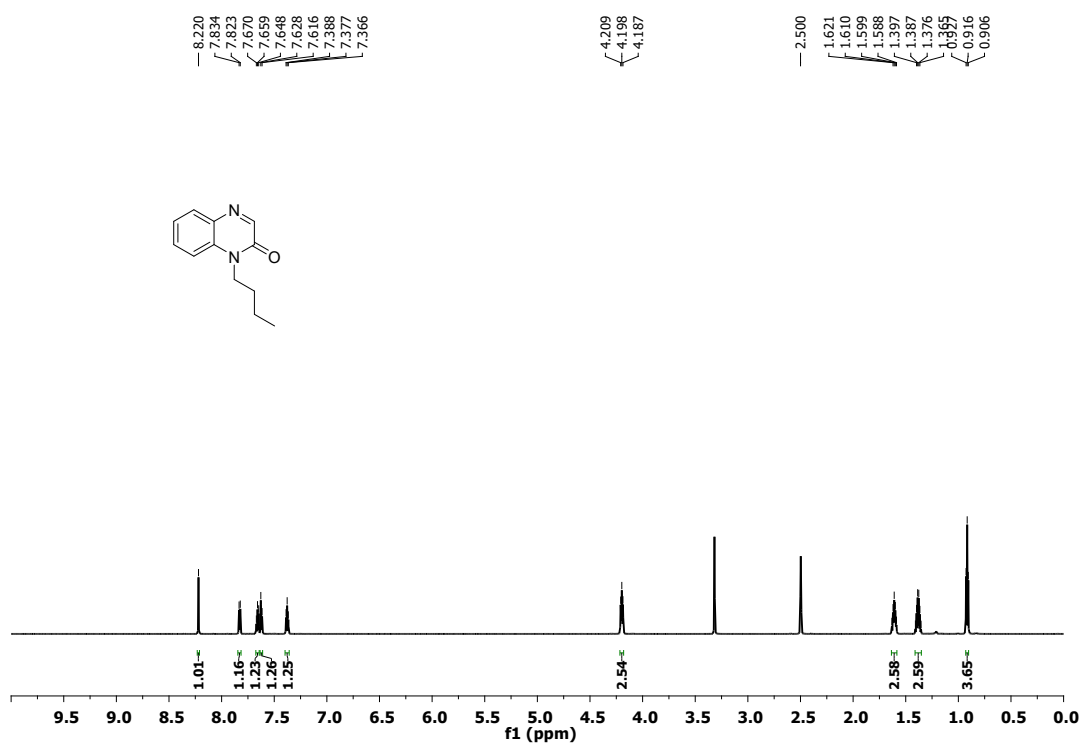

**Figure S27.**  $^1\text{H}$  NMR (700 MHz,  $\text{DMSO-}d_6$ ) spectrum of 1-butylquinoxalin-2(1*H*)-one (**1j**).

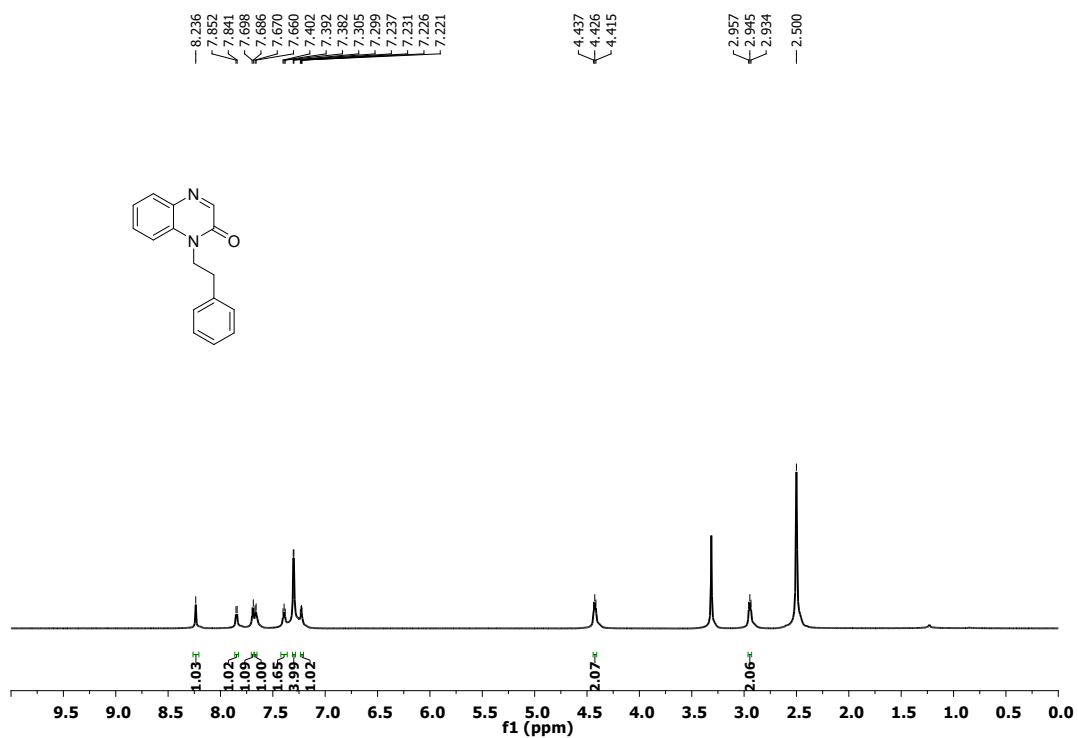

Figure S28. <sup>1</sup>H NMR (700 MHz, DMSO-*d*<sub>6</sub>) spectrum of 1-phenethylquinoxalin-2(1H)-one (1k).

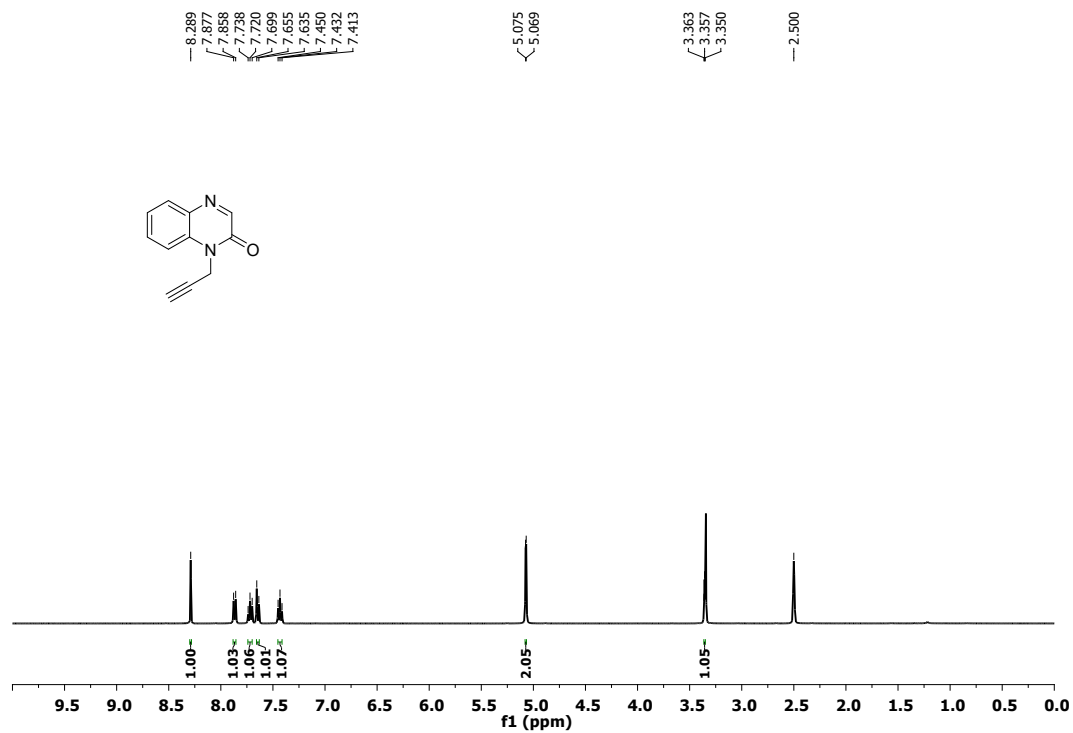



**Figure S29.**  $^1\text{H}$  NMR (400 MHz,  $\text{DMSO-}d_6$ ) spectrum of 1-(prop-2-yn-1-yl)quinoxalin-2(1*H*)-one (**1l**).

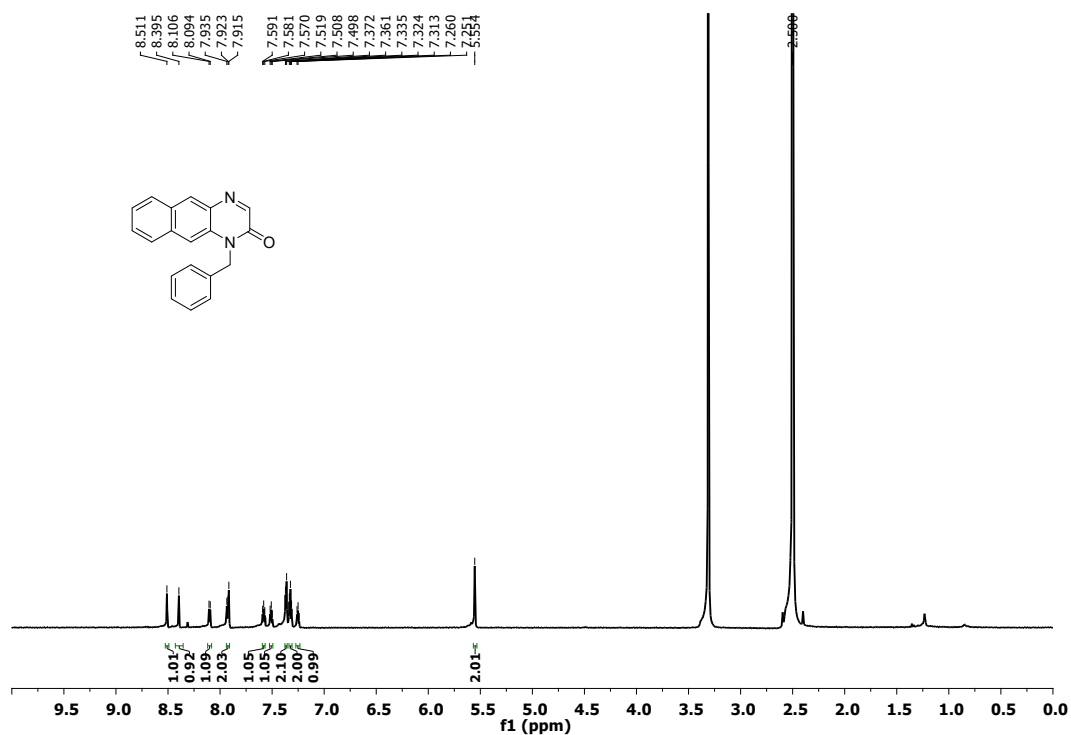

**Figure S30.**  $^1\text{H}$  NMR (700 MHz,  $\text{DMSO-}d_6$ ) spectrum of 1-benzylbenzo[*g*]quinoxalin-2(1*H*)-one (**1m**).

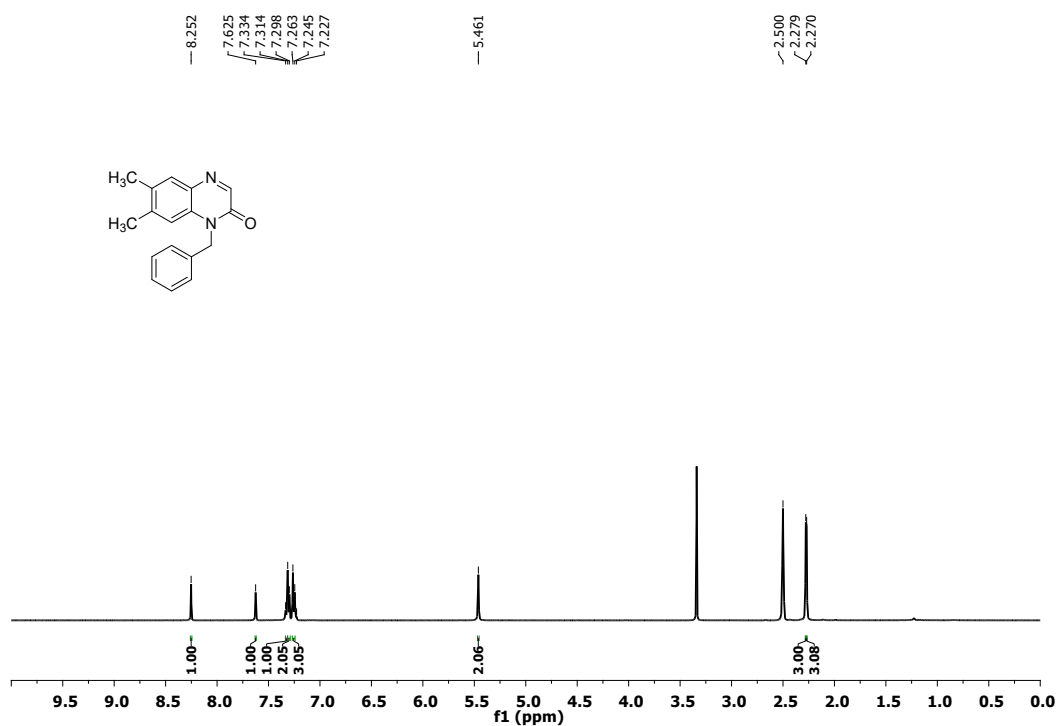

**Figure S31.**  $^1\text{H}$  NMR (400 MHz,  $\text{DMSO-}d_6$ ) spectrum of 1-benzyl-6,7-dimethylquinoxalin-2(1*H*)-one (**1n**).

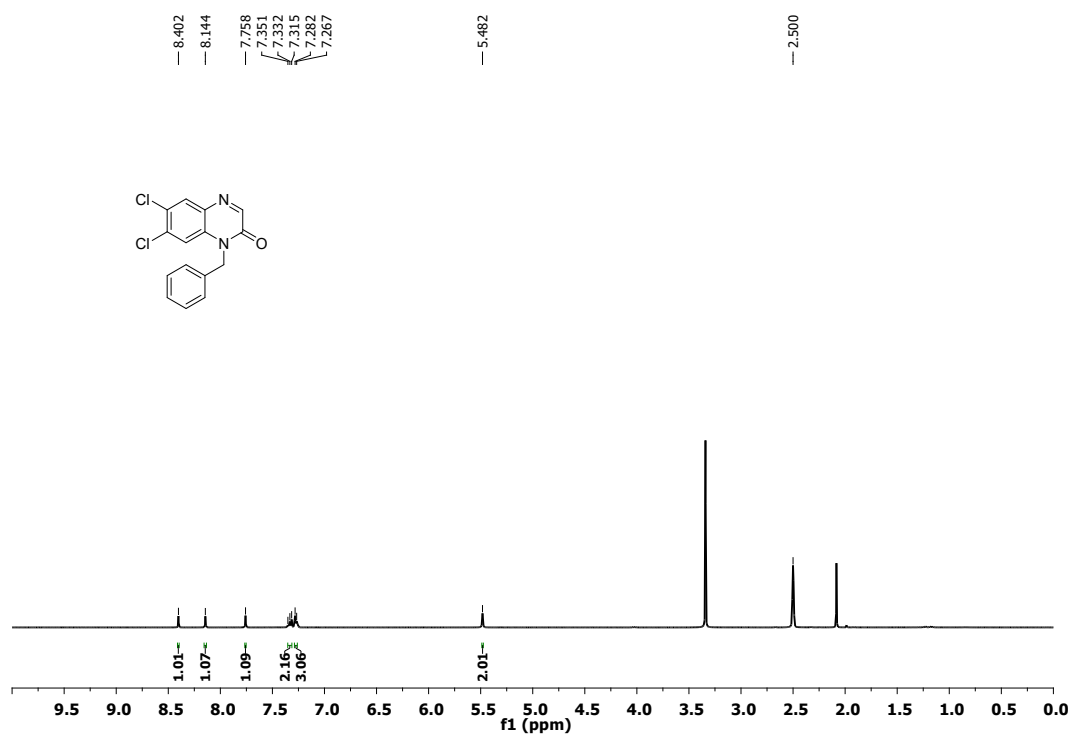

**Fig. S32.**  $^1\text{H}$  NMR (400 MHz,  $\text{DMSO-}d_6$ ) spectrum of 1-benzyl-6,7-dichloroquinoxalin-2(1*H*)-one (**1o**).

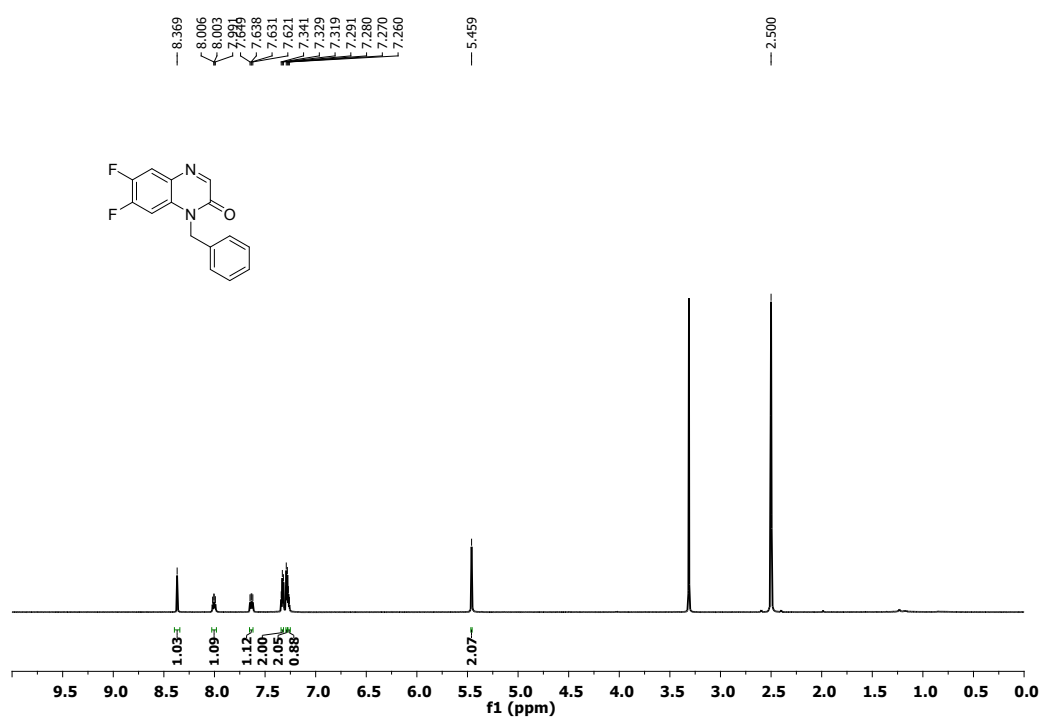

**Figure S33.**  $^1\text{H}$  NMR (700 MHz,  $\text{DMSO-}d_6$ ) spectrum of 1-benzyl-6,7-difluoroquinoxalin-2(1*H*)-one (**1p**).

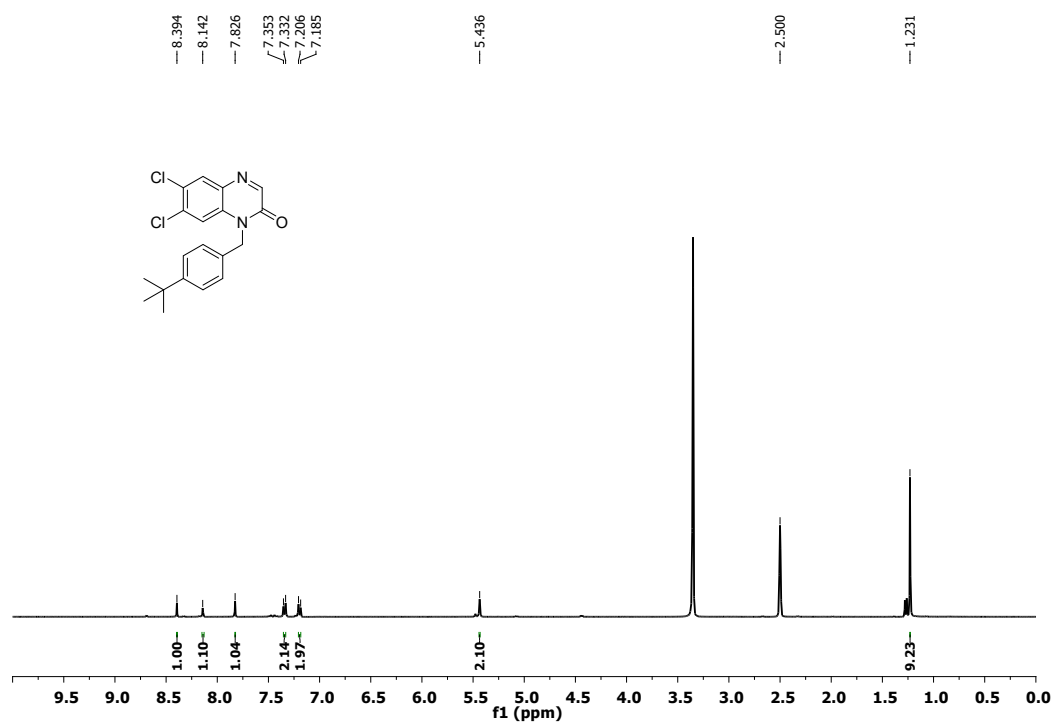

**Figure S34.**  $^1\text{H}$  NMR (400 MHz,  $\text{DMSO-}d_6$ ) spectrum of 1-(4-(*tert*-butyl)benzyl)-6,7-dichloroquinoxalin-2(1*H*)-one (**1q**).

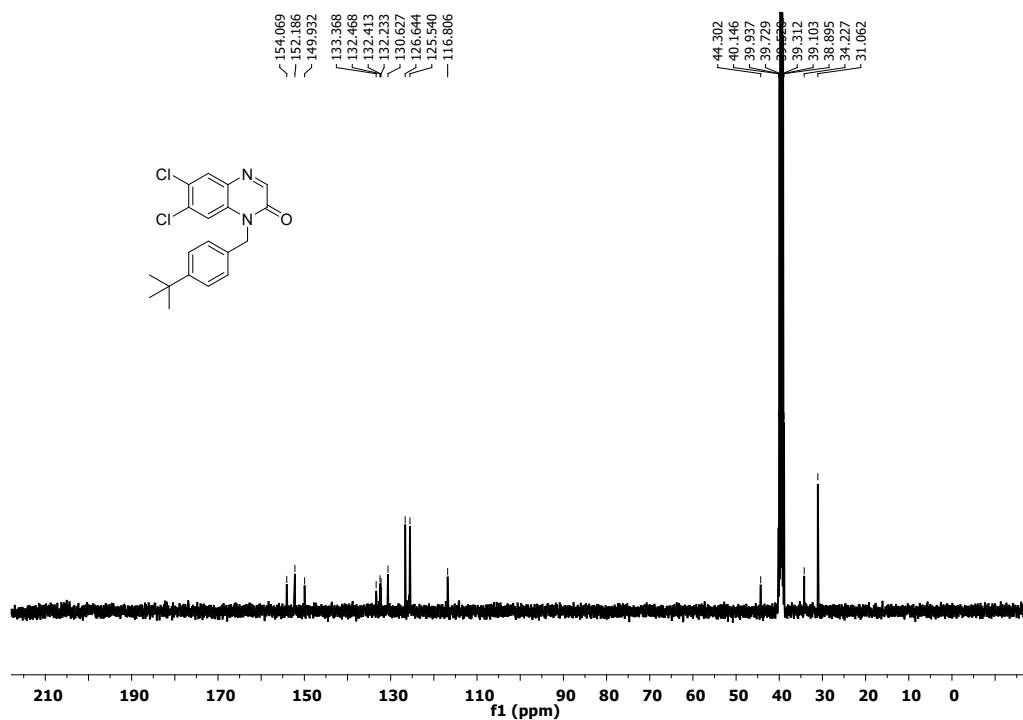

**Figure S35.**  $^{13}\text{C}\{^1\text{H}\}$  NMR (100 MHz,  $\text{DMSO-}d_6$ ) spectrum of 1-(4-(*tert*-butyl)benzyl)-6,7-dichloroquinoxalin-2(*1H*)-one (**1q**).

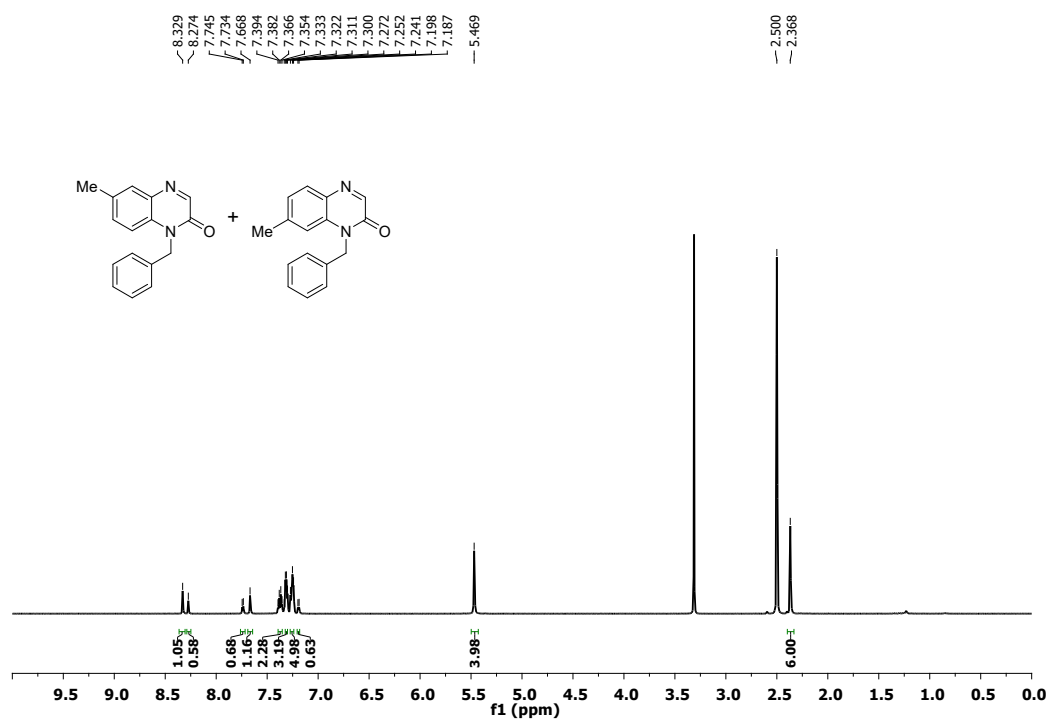

**Figure S36.**  $^1\text{H}$  NMR (700 MHz,  $\text{DMSO-}d_6$ ) spectrum of 1-benzyl-6-methylquinoxalin-2(*1H*)-one and 1-benzyl-7-methylquinoxalin-2(*1H*)-one (**1r**).

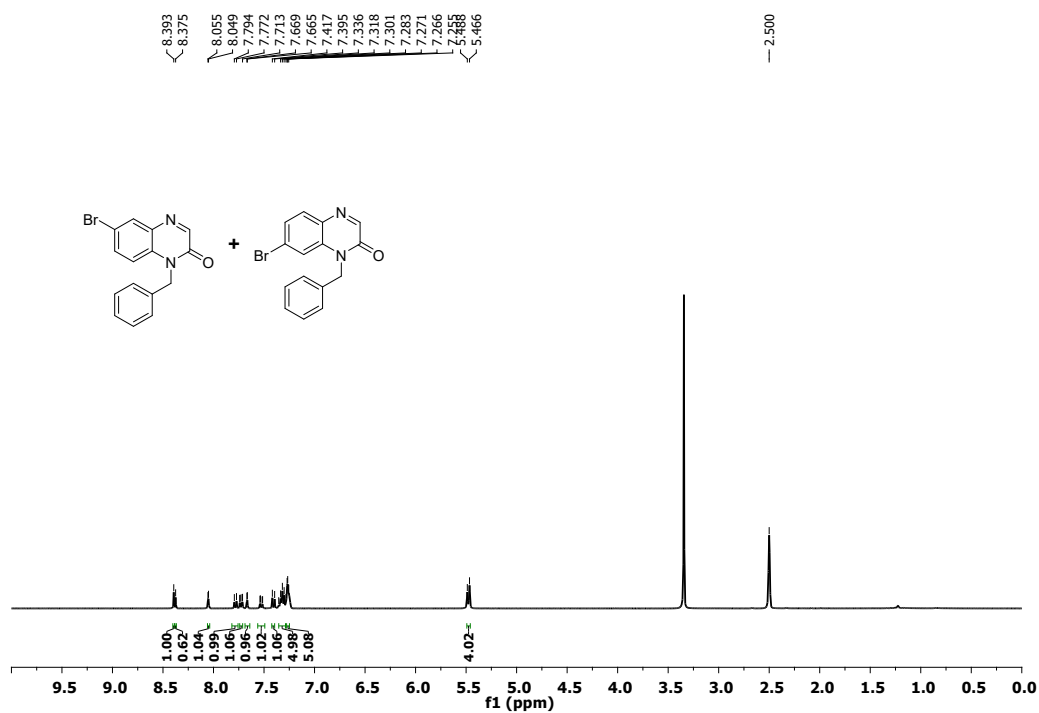

**Figure S37.**  $^1\text{H}$  NMR (400 MHz,  $\text{DMSO-}d_6$ ) spectrum of 1-benzyl-6-bromoquinoxalin-2(1*H*)-one and 1-benzyl-7-bromoquinoxalin-2(1*H*)-one (**1s**).

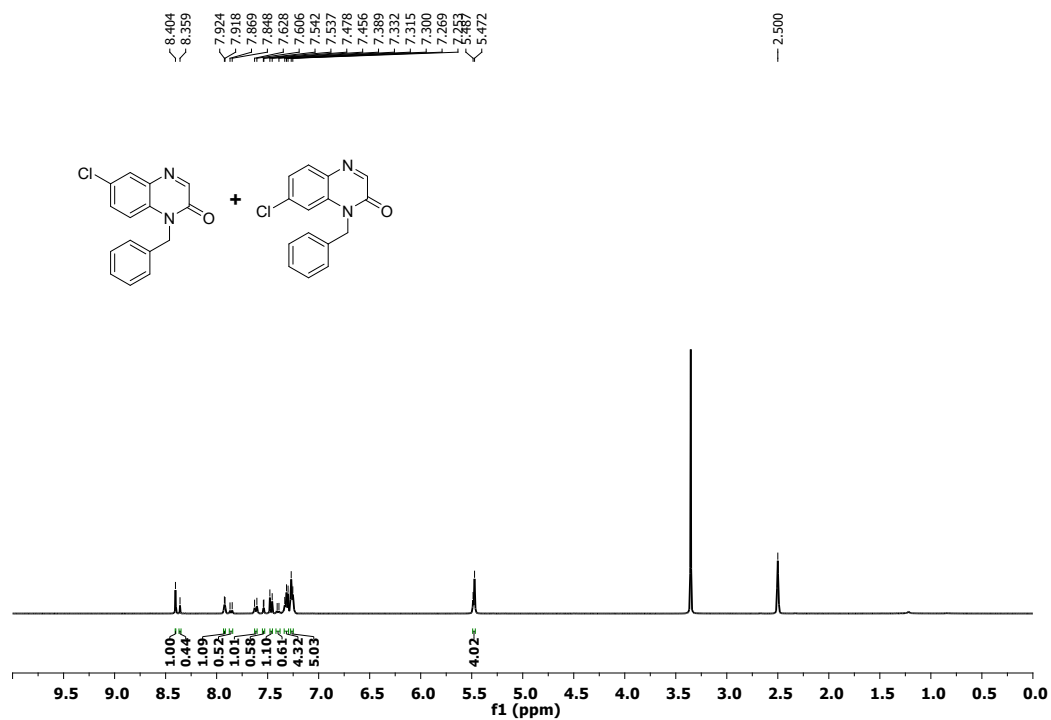

**Figure S38.**  $^1\text{H}$  NMR (400 MHz,  $\text{DMSO-}d_6$ ) spectrum of 1-benzyl-6-chloroquinoxalin-2(1*H*)-one and 1-benzyl-7-chloroquinoxalin-2(1*H*)-one (**1t**).

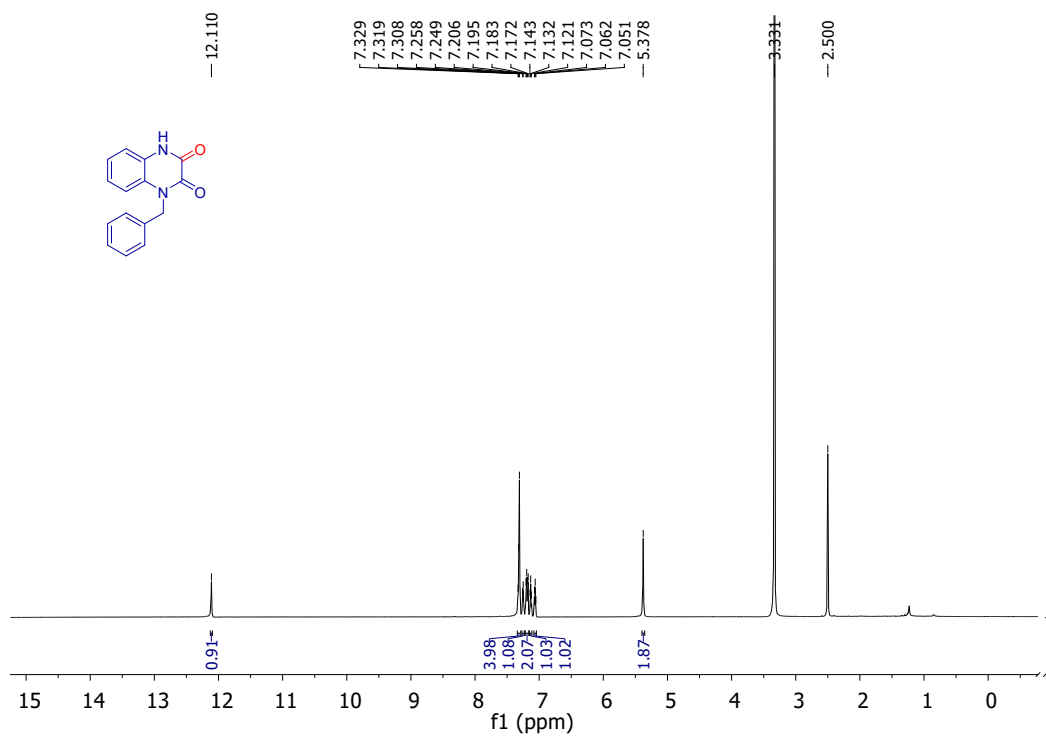

**Figure S39.**  $^1\text{H}$  NMR (700 MHz,  $\text{DMSO-}d_6$ ) spectrum of 1-benzyl-1,4-dihydroquinoxaline-2,3-dione (**2a**).

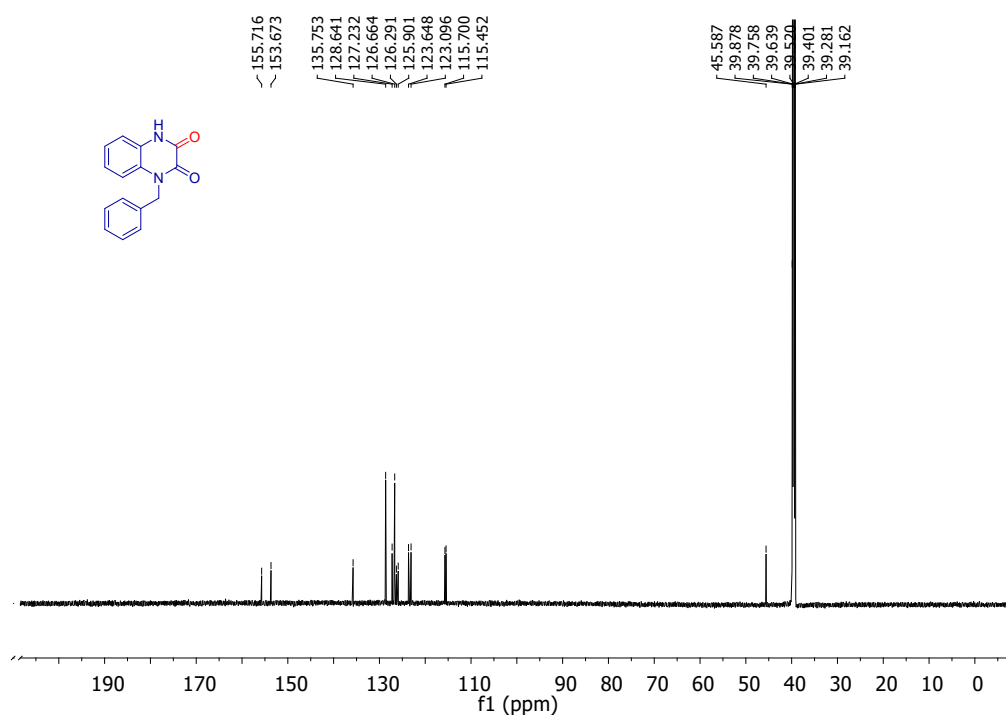

**Figure S40.**  $^{13}\text{C}\{^1\text{H}\}$  NMR (175 MHz,  $\text{DMSO-}d_6$ ) spectrum of 1-(4-tert-butylphenyl)-1,4-dihydroquinoxaline-2,3-dione (**2a**).

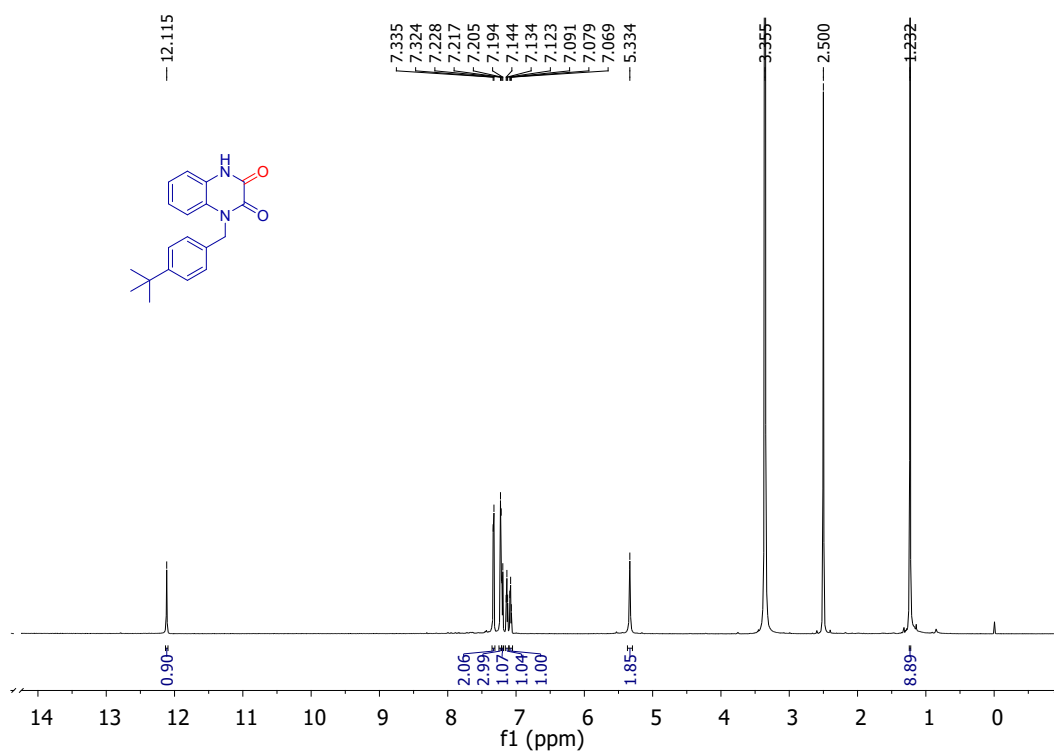

**Figure S41.**  $^1\text{H}$  NMR (700 MHz,  $\text{DMSO-}d_6$ ) spectrum of 1-(4-(*tert*-butyl)benzyl)-1,4-dihydroquinoxaline-2,3-dione (**2b**).

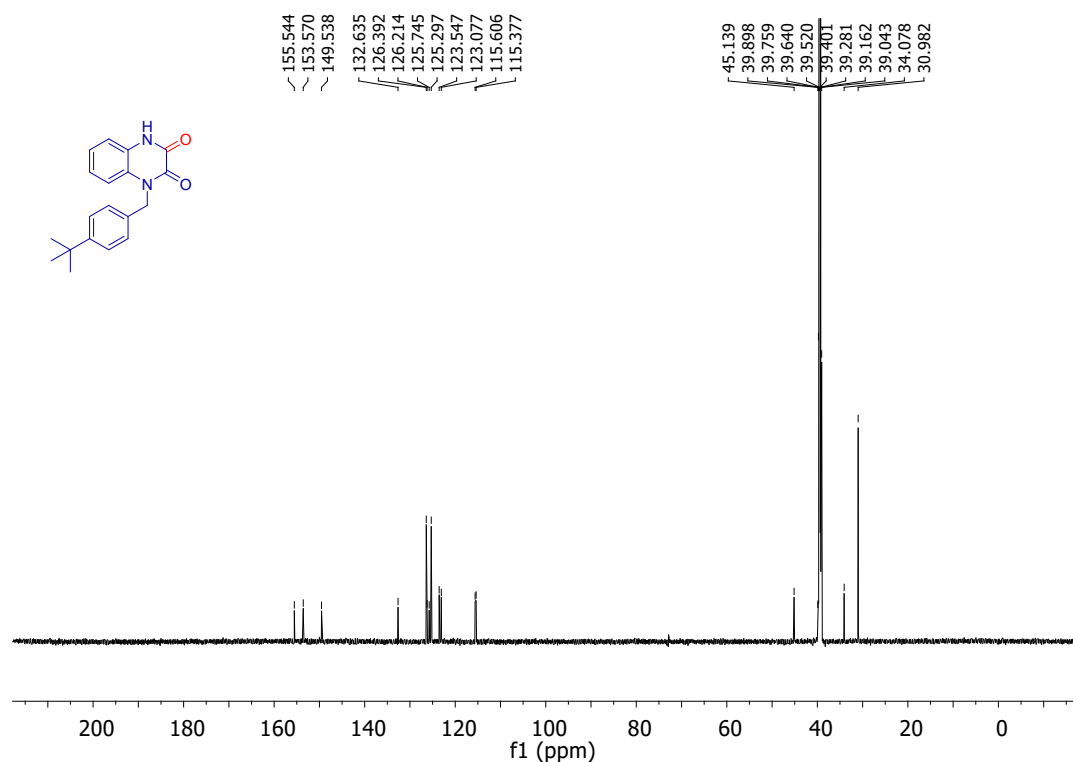

**Figure S42.**  $^{13}\text{C}\{^1\text{H}\}$  NMR (175 MHz,  $\text{DMSO-}d_6$ ) spectrum of 1-(4-(*tert*-butyl)benzyl)-1,4-dihydroquinoxaline-2,3-dione (**2b**).

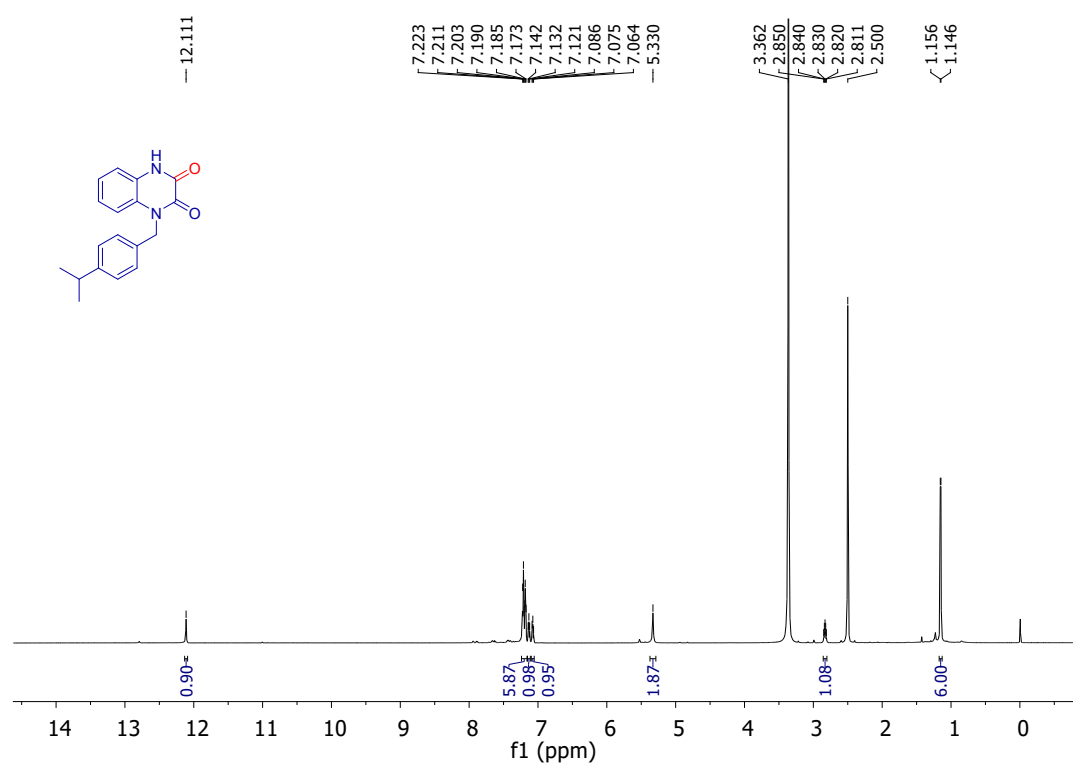

**Figure S43.**  $^1\text{H}$  NMR (700 MHz,  $\text{DMSO-}d_6$ ) spectrum of 1-(4-Isopropylbenzyl)-1,4-dihydroquinoxaline-2,3-dione (**2c**).

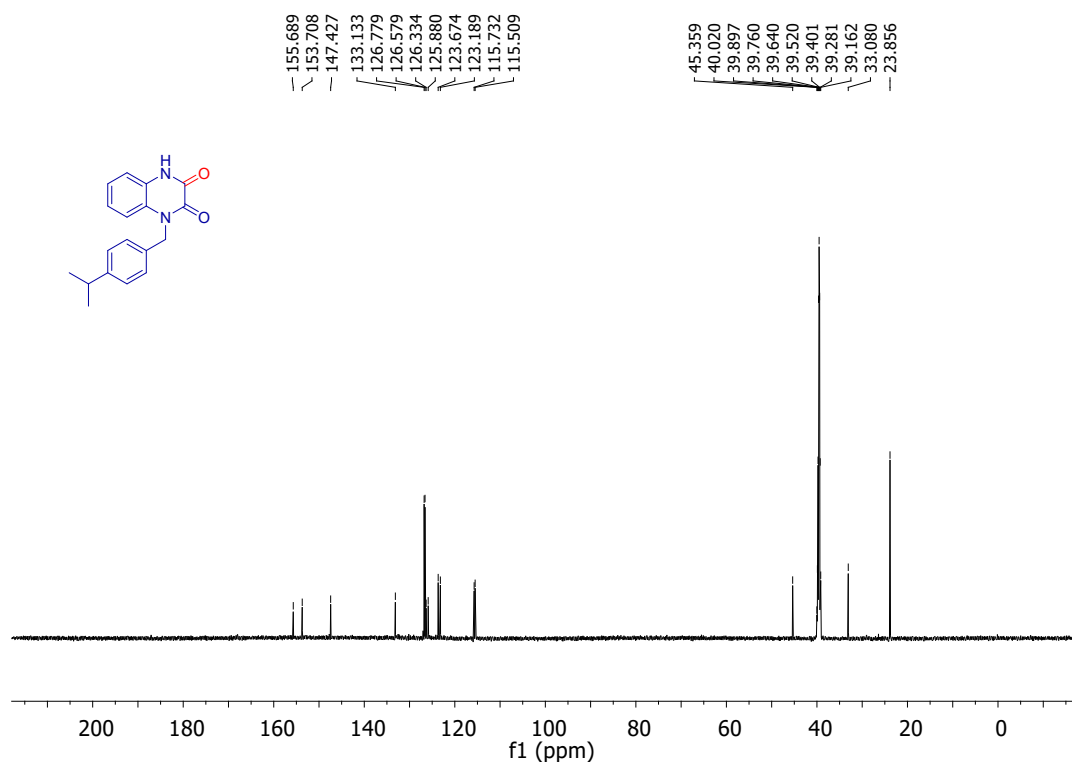

**Figure S44.**  $^{13}\text{C}\{^1\text{H}\}$  NMR (175 MHz,  $\text{DMSO-}d_6$ ) spectrum of 1-(4-isopropylbenzyl)-1,4-dihydroquinoxaline-2,3-dione (**2c**).

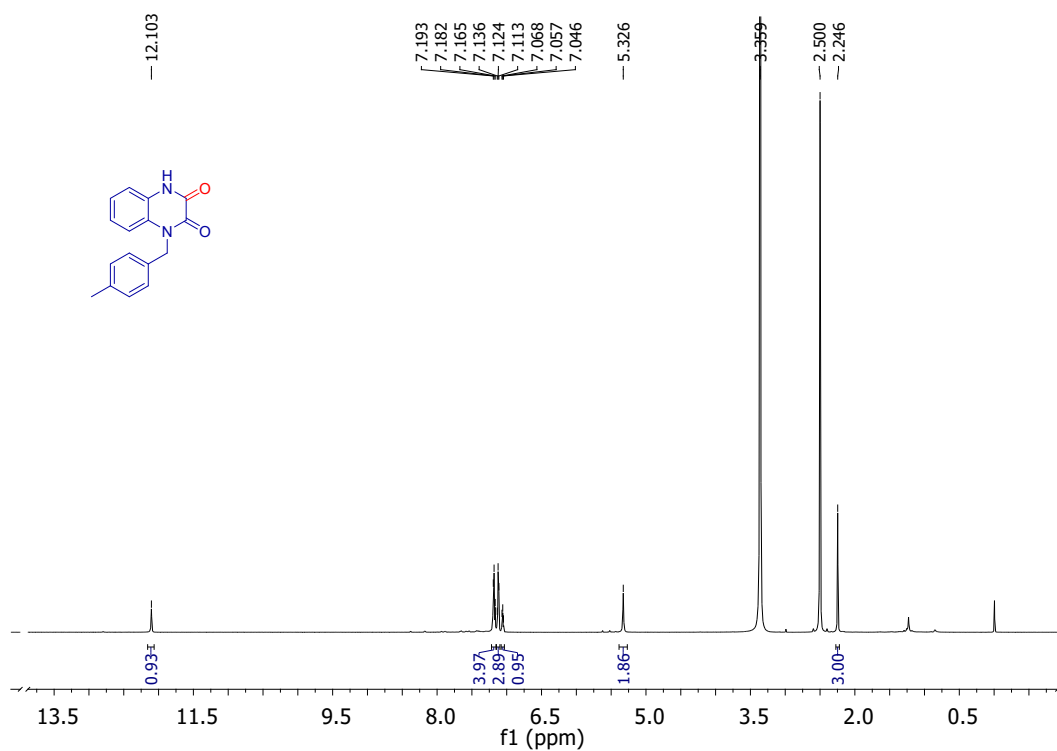



**Figure S45.**  $^1\text{H}$  NMR (700 MHz,  $\text{DMSO-}d_6$ ) spectrum of 1-(4-methylbenzyl)-1,4-dihydroquinoxaline-2,3-dione (**2d**).

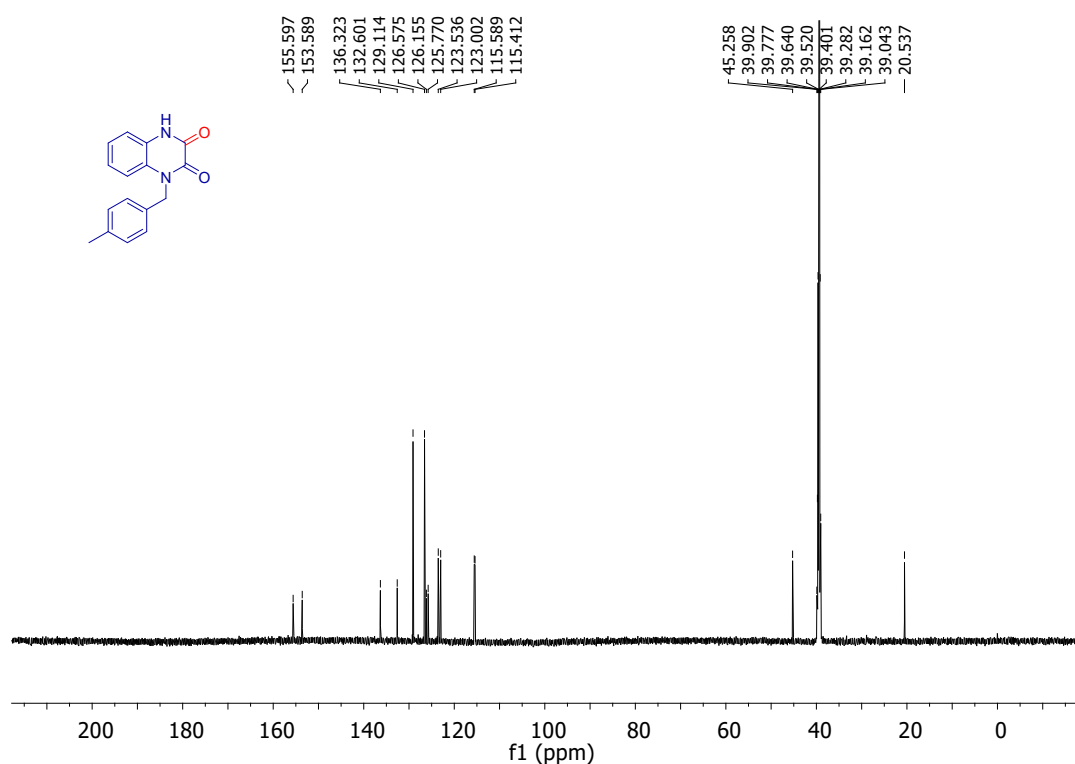

**Figure S46.**  $^{13}\text{C}\{^1\text{H}\}$  NMR (175 MHz,  $\text{DMSO-}d_6$ ) spectrum of 1-(4-methylbenzyl)-1,4-dihydroquinoxaline-2,3-dione (**2d**).

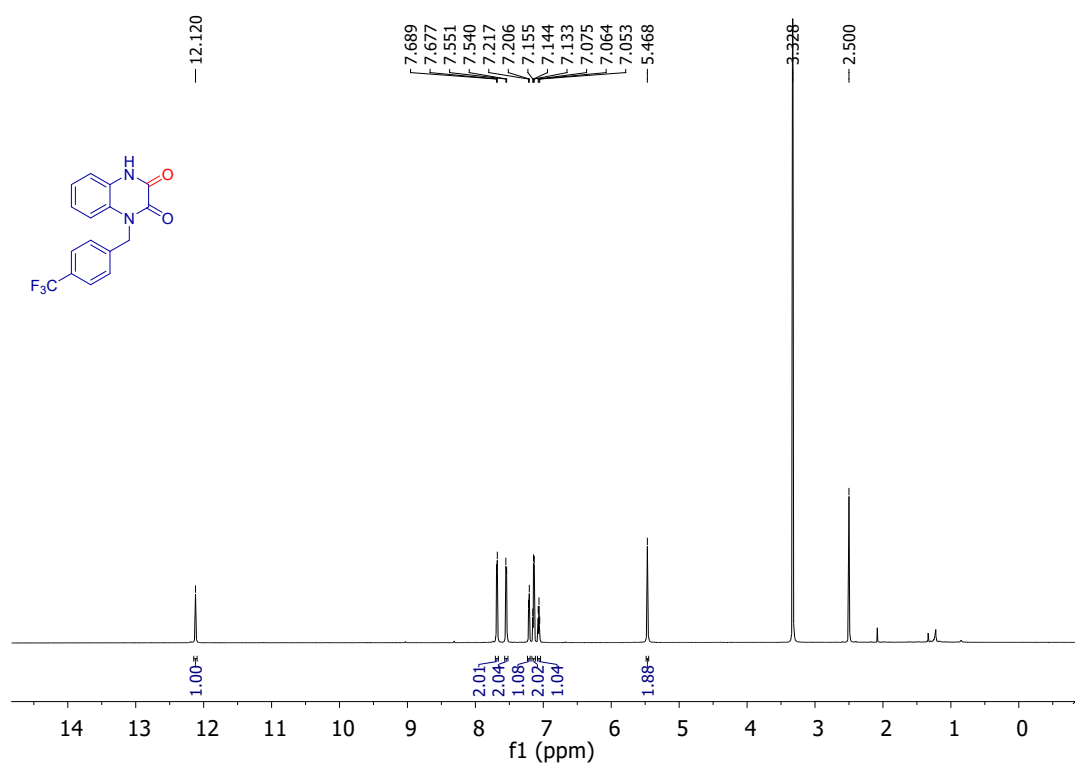

**Figure S47.**  $^1\text{H}$  NMR (700 MHz,  $\text{DMSO-}d_6$ ) spectrum of 1-(4-trifluoromethylbenzyl)-1,4-dihydroquinoxaline-2,3-dione (**2e**).

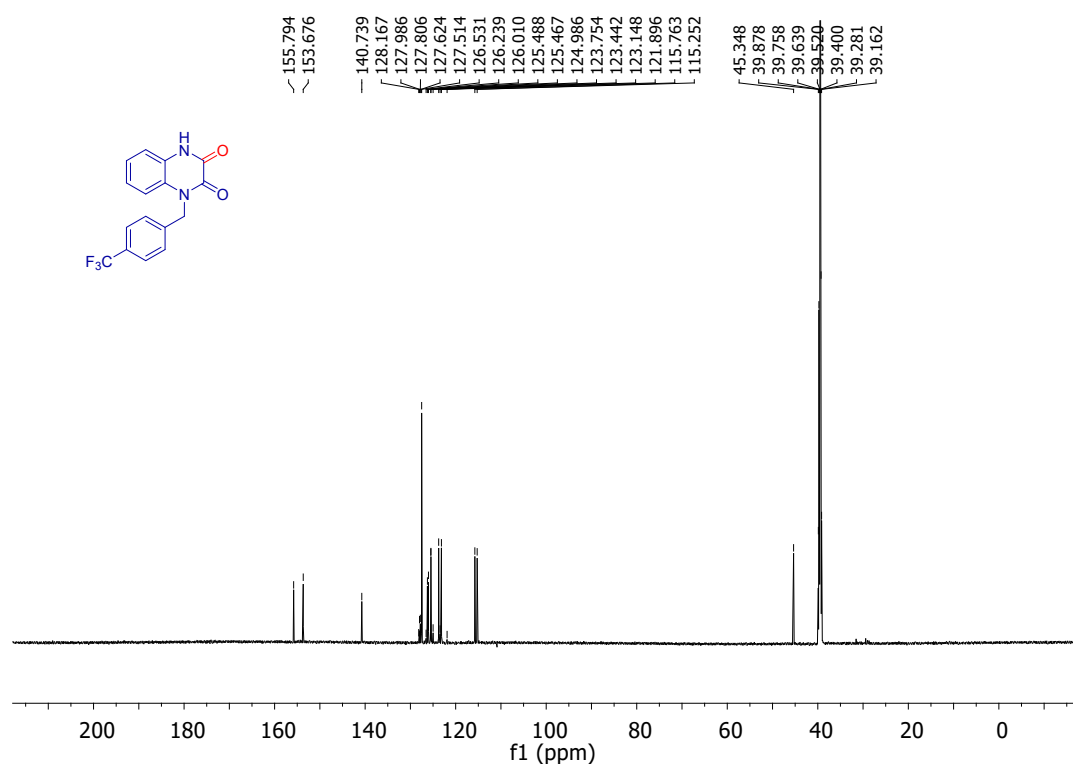

**Figure S48.**  $^{13}\text{C}\{^1\text{H}\}$  NMR (175 MHz,  $\text{DMSO-}d_6$ ) spectrum of 1-(4-trifluoromethylbenzyl)-1,4-dihydroquinoxaline-2,3-dione (**2e**).

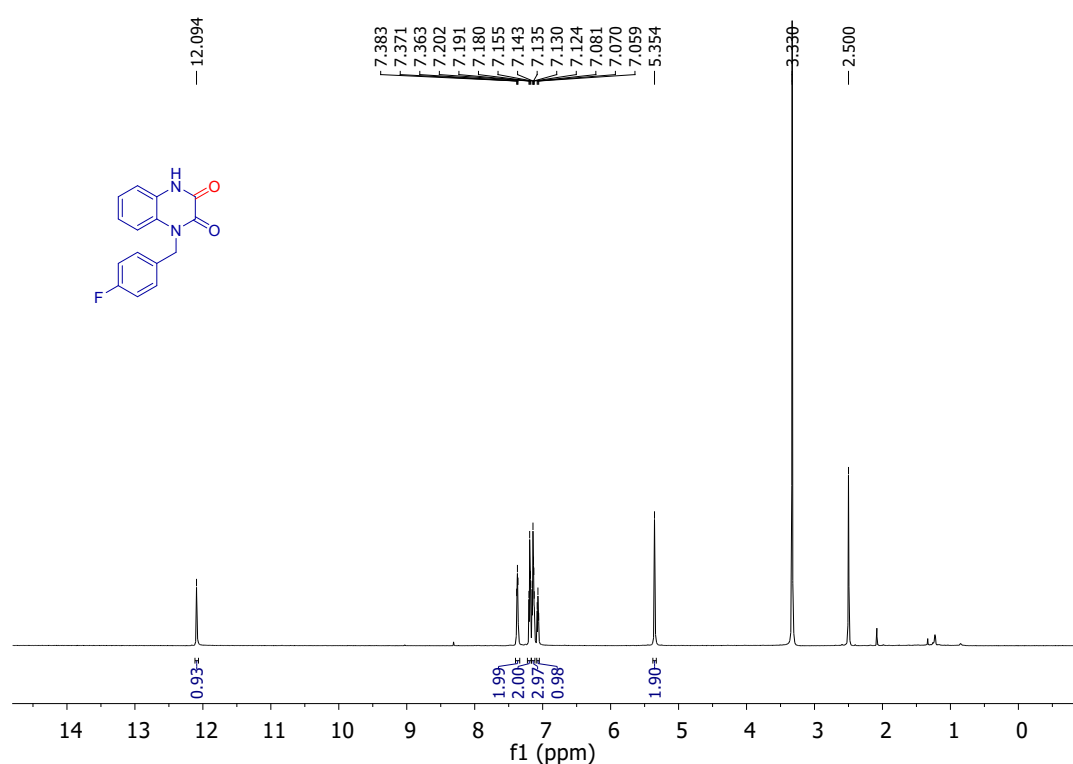

**Figure S49.**  $^1\text{H}$  NMR (700 MHz,  $\text{DMSO-}d_6$ ) spectrum of 1-(4-fluorobenzyl)-1,4-dihydroquinoxaline-2,3-dione (**2f**).

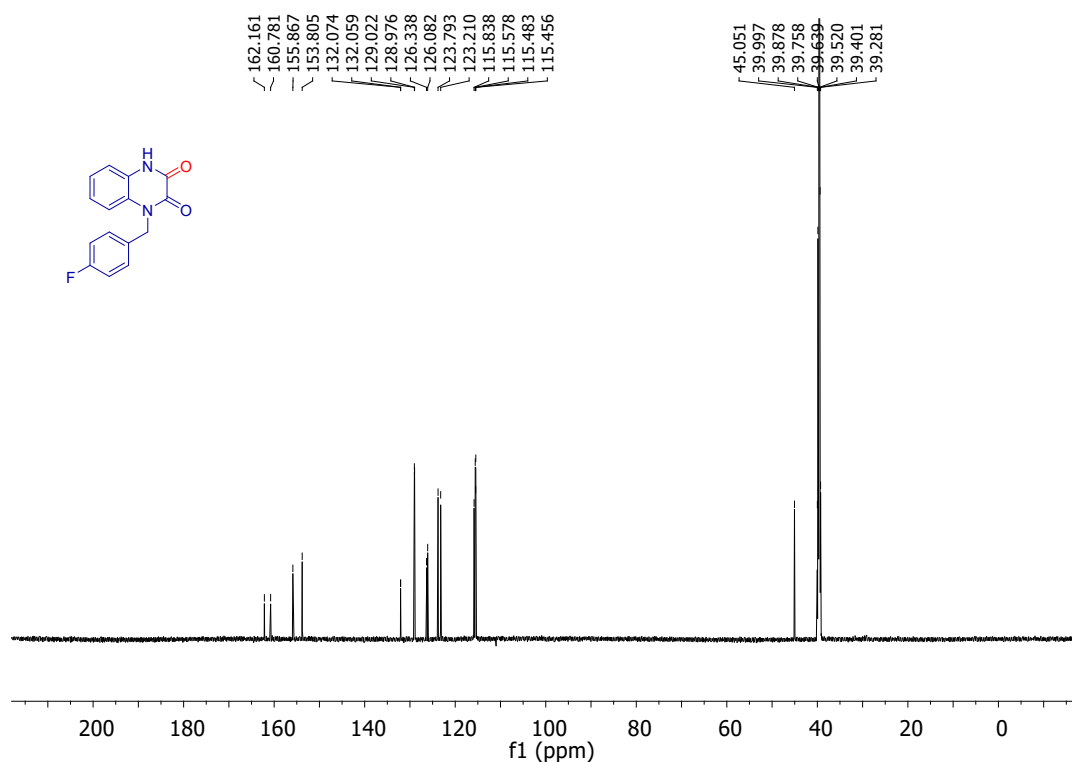

**Figure S50.**  $^{13}\text{C}\{^1\text{H}\}$  NMR (175 MHz,  $\text{DMSO-}d_6$ ) spectrum of 1-(4-fluorobenzyl)-1,4-dihydroquinoxaline-2,3-dione (**2f**).

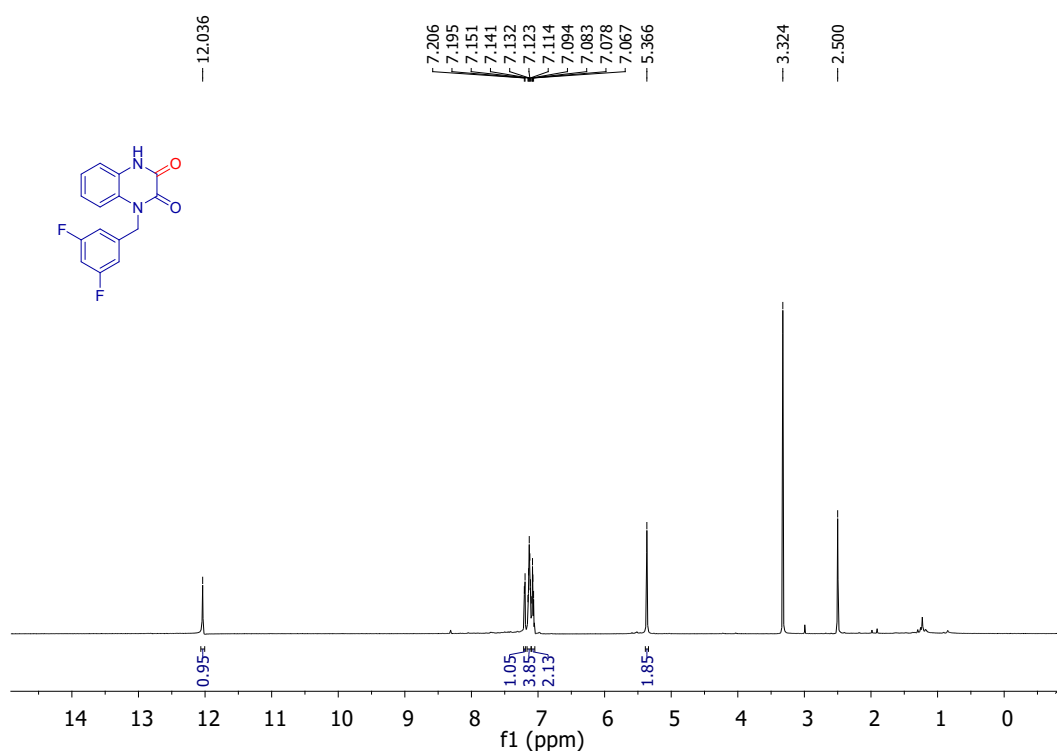

**Figure S51.**  $^1\text{H}$  NMR (700 MHz,  $\text{DMSO-}d_6$ ) spectrum of 1-(3,5-difluorobenzyl)-1,4-dihydroquinoxaline-2,3-dione (**2g**).

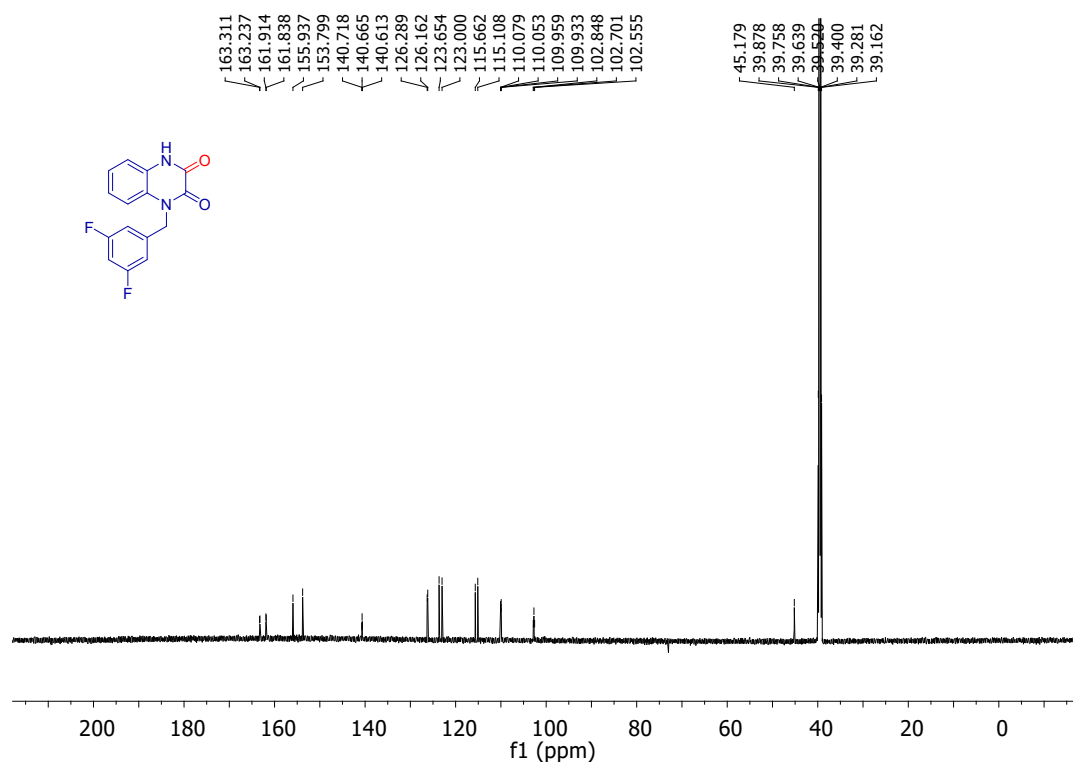

**Figure S52.**  $^{13}\text{C}\{^1\text{H}\}$  NMR (175 MHz,  $\text{DMSO-}d_6$ ) spectrum of 1-(3,5-difluorobenzyl)-1,4-dihydroquinoxaline-2,3-dione (**2g**).

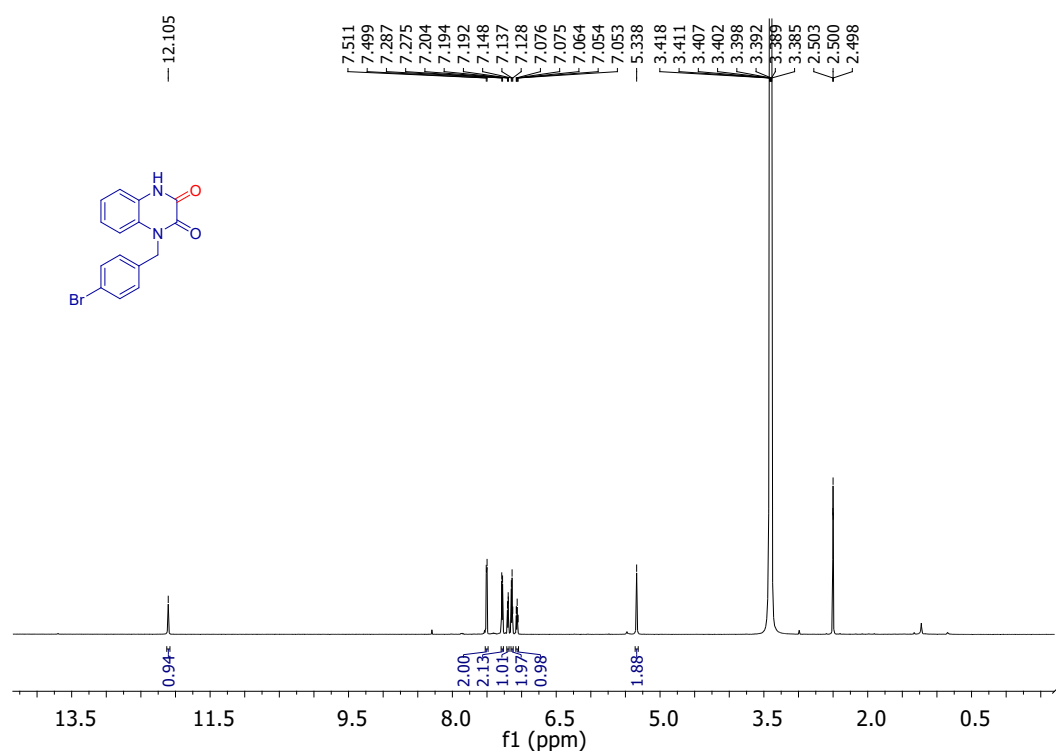

**Figure S53.**  $^1\text{H}$  NMR (700 MHz,  $\text{DMSO-}d_6$ ) spectrum of 1-(4-bromobenzyl)-1,4-dihydroquinoxaline-2,3-dione (**2h**).

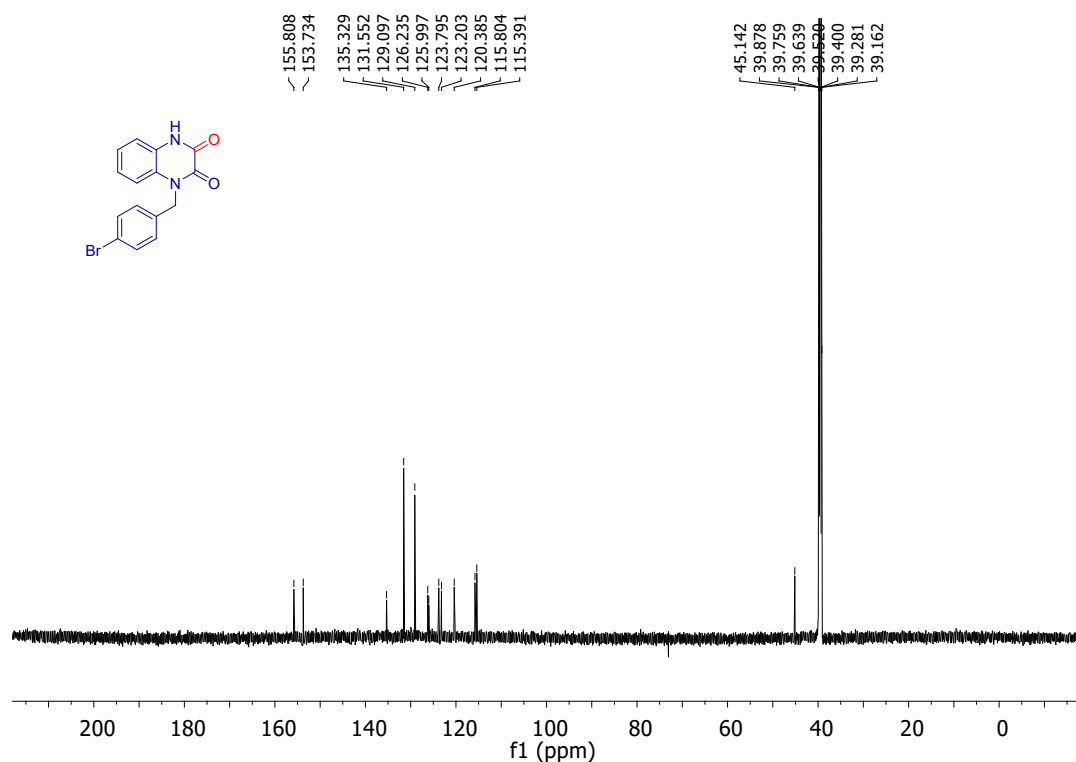

**Figure S54.**  $^{13}\text{C}\{^1\text{H}\}$  NMR (175 MHz,  $\text{DMSO-}d_6$ ) spectrum of 1-(4-bromobenzyl)-1,4-dihydroquinoxaline-2,3-dione (**2h**).

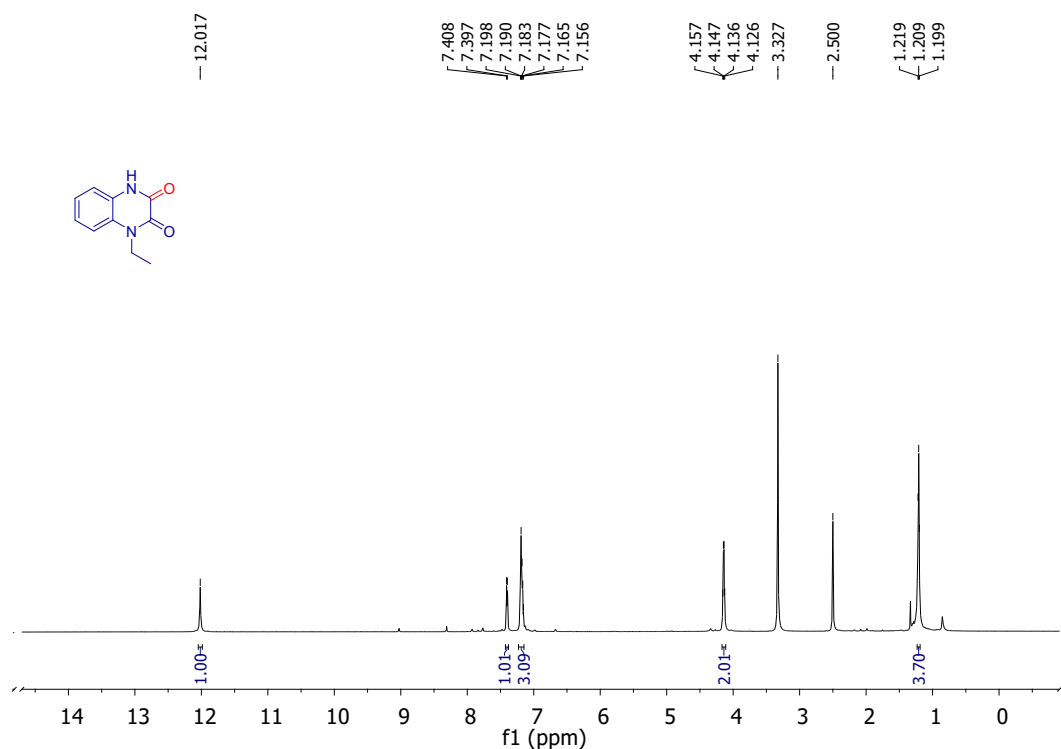

**Figure S55.**  $^1\text{H}$  NMR (700 MHz,  $\text{DMSO-}d_6$ ) spectrum of 1-ethyl-1,4-dihydroquinoxaline-2,3-dione (**2i**).

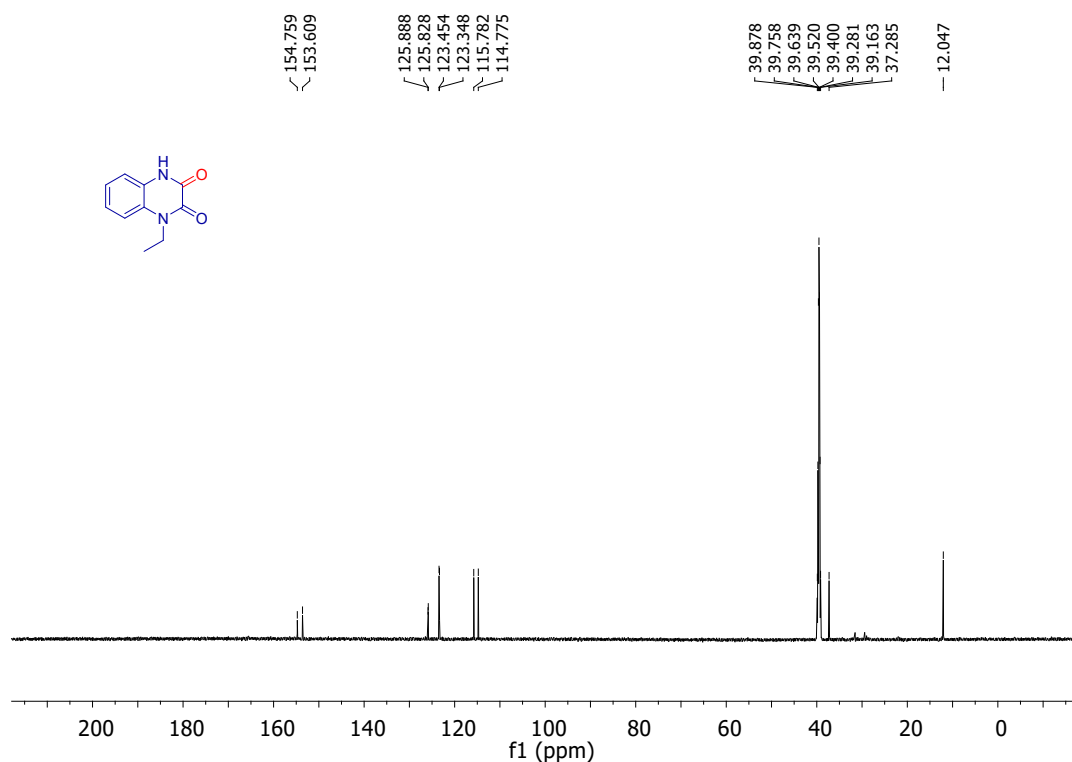

**Figure S56.**  $^{13}\text{C}\{^1\text{H}\}$  NMR (175 MHz,  $\text{DMSO-}d_6$ ) spectrum of 1-ethyl-1,4-dihydroquinoxaline-2,3-dione (**2i**).

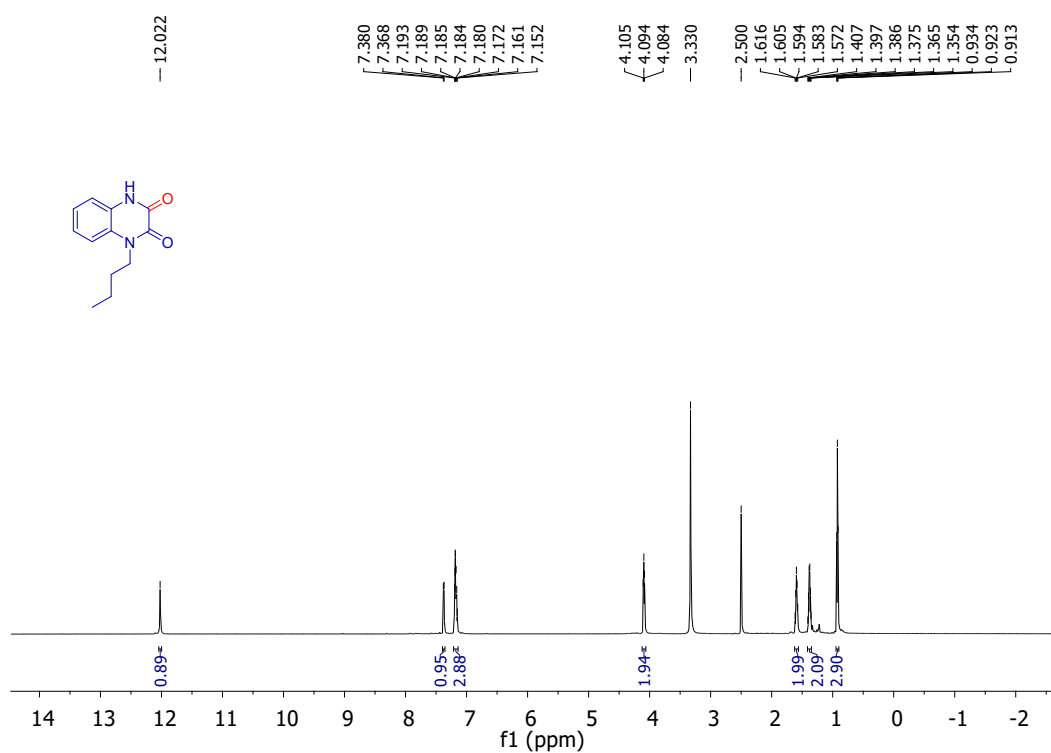

**Figure S57.**  $^1\text{H}$  NMR (700 MHz,  $\text{DMSO-}d_6$ ) spectrum of 1-butyl-1,4-dihydroquinoxaline-2,3-dione (**2j**).

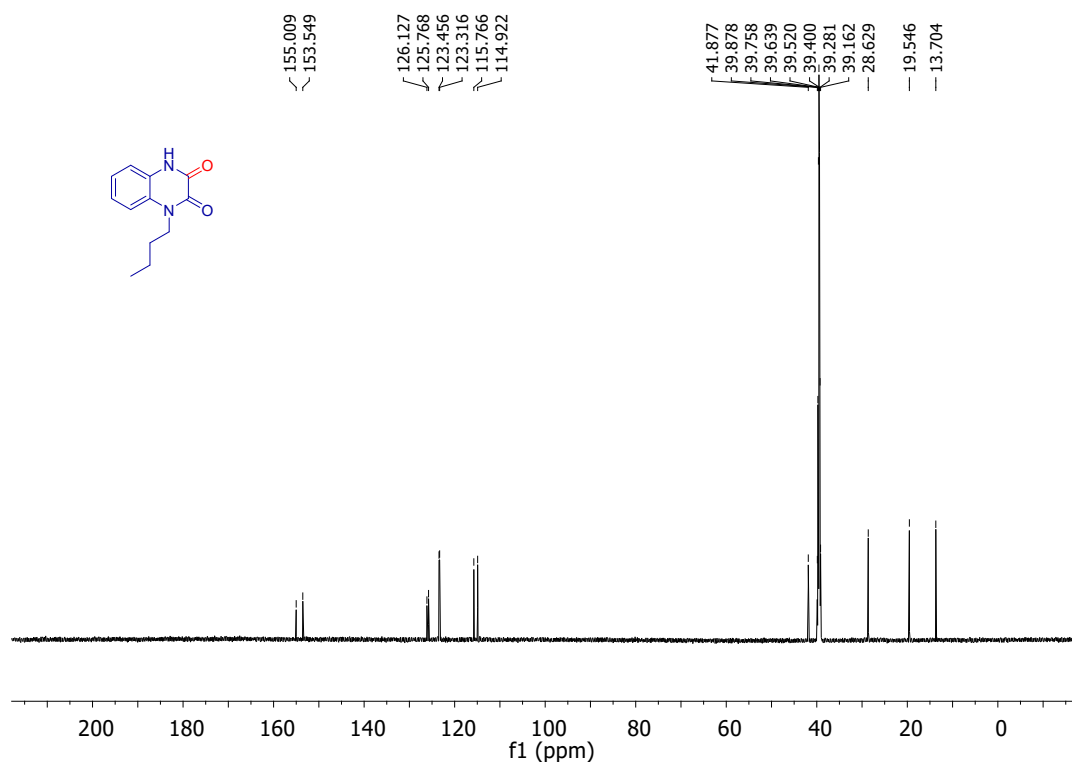

**Figure S58.**  $^{13}\text{C}\{^1\text{H}\}$  NMR (175 MHz,  $\text{DMSO-}d_6$ ) spectrum of 1-butyl-1,4-dihydroquinoxaline-2,3-dione (**2j**).

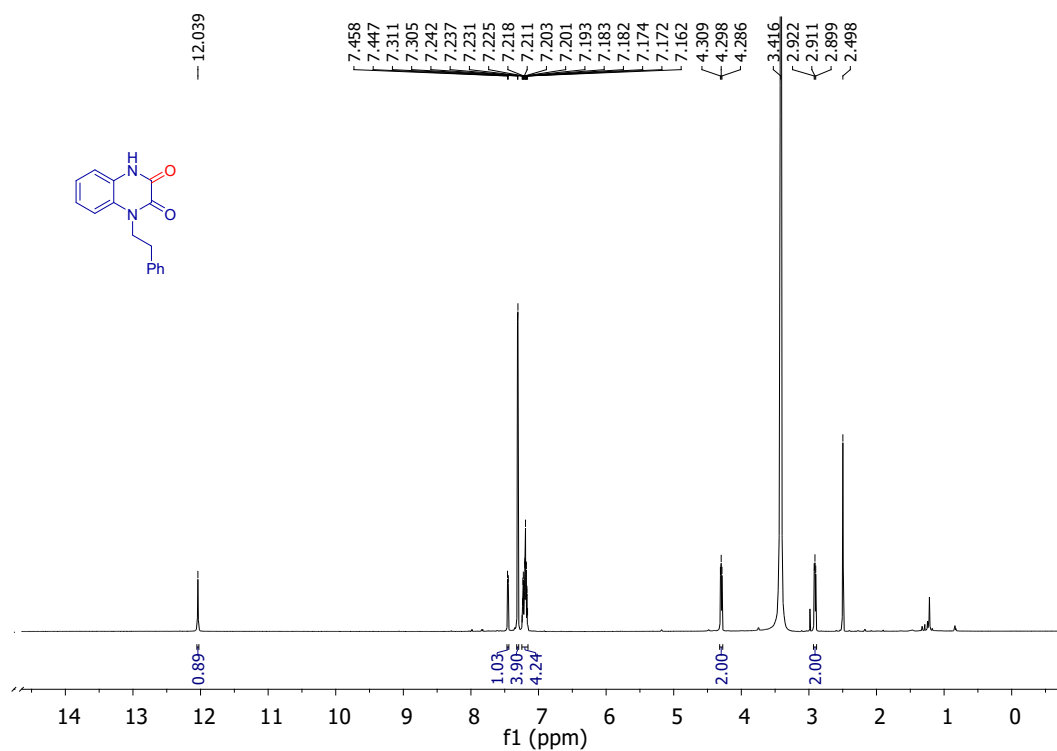

**Figure S59.**  $^1\text{H}$  NMR (700 MHz,  $\text{DMSO-}d_6$ ) spectrum of 1-phenethyl-1,4-dihydroquinoxaline-2,3-dione (**2k**).

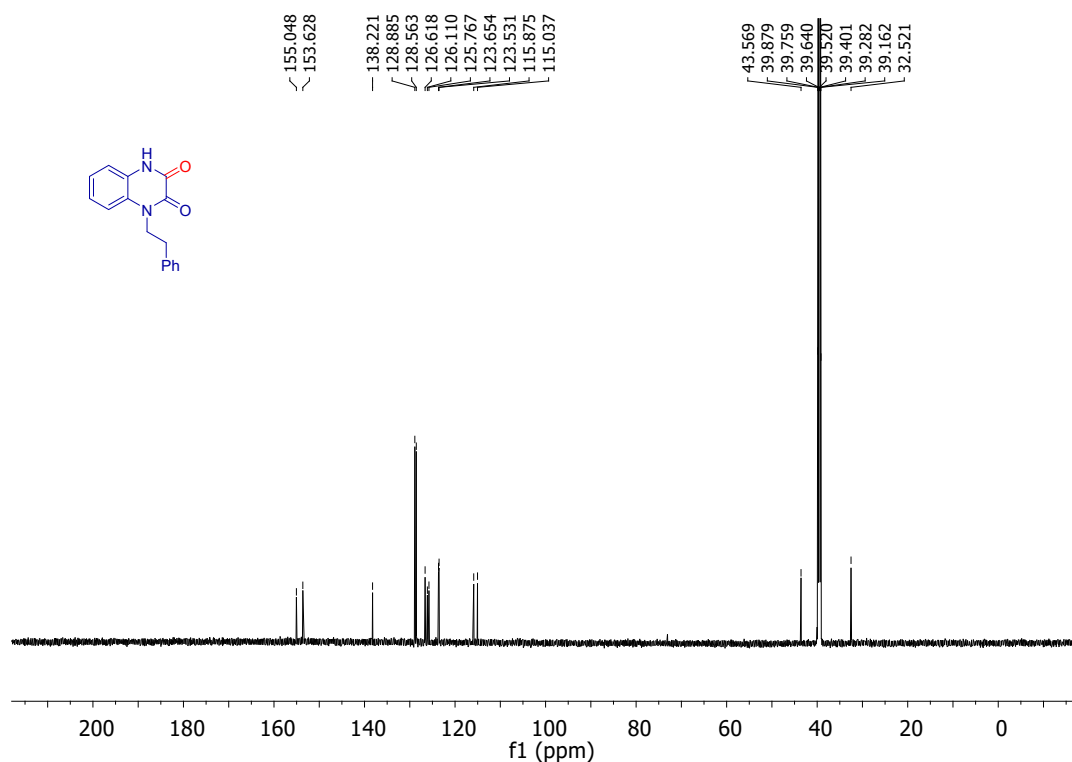

**Figure S60.**  $^{13}\text{C}\{^1\text{H}\}$  NMR (175 MHz,  $\text{DMSO-}d_6$ ) spectrum of 1-phenethyl-1,4-dihydroquinoxaline-2,3-dione (**2k**).

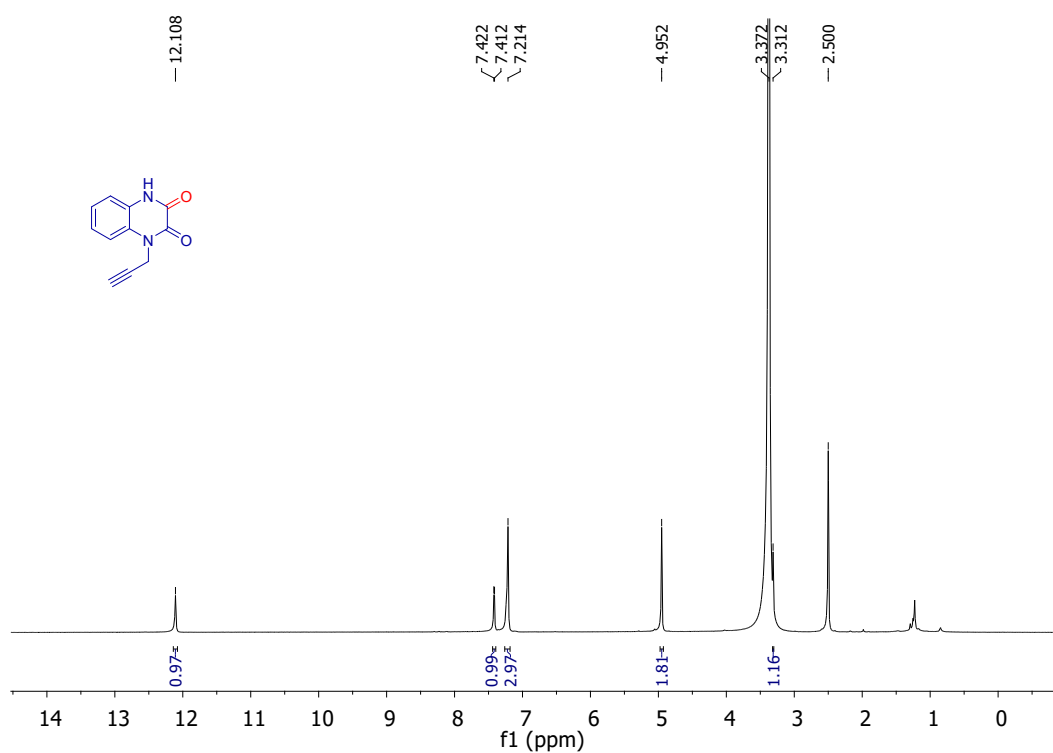



**Figure S61.**  $^1\text{H}$  NMR (700 MHz,  $\text{DMSO-}d_6$ ) spectrum of 1-(prop-2-yn-1-yl)-1,4-dihydroquinoxaline-2,3-dione (**21**).

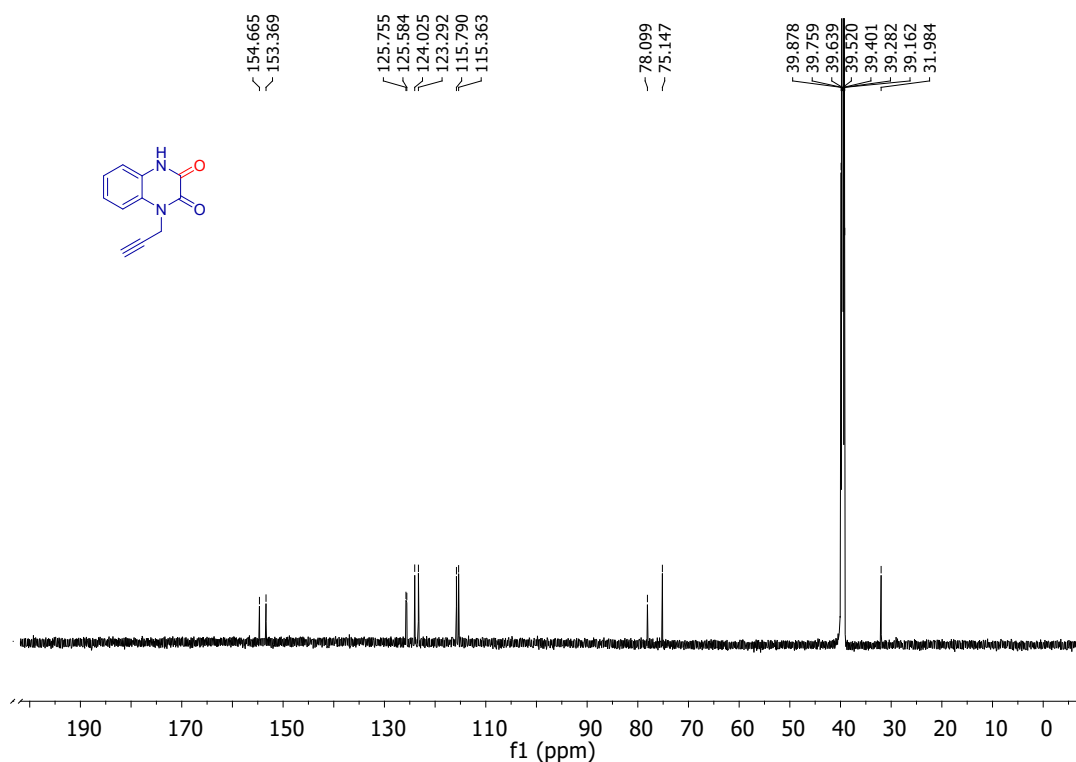

**Figure S62.**  $^{13}\text{C}\{^1\text{H}\}$  NMR (175 MHz,  $\text{DMSO-}d_6$ ) spectrum of 1-(prop-2-yn-1-yl)-1,4-dihydroquinoxaline-2,3-dione (**21**).

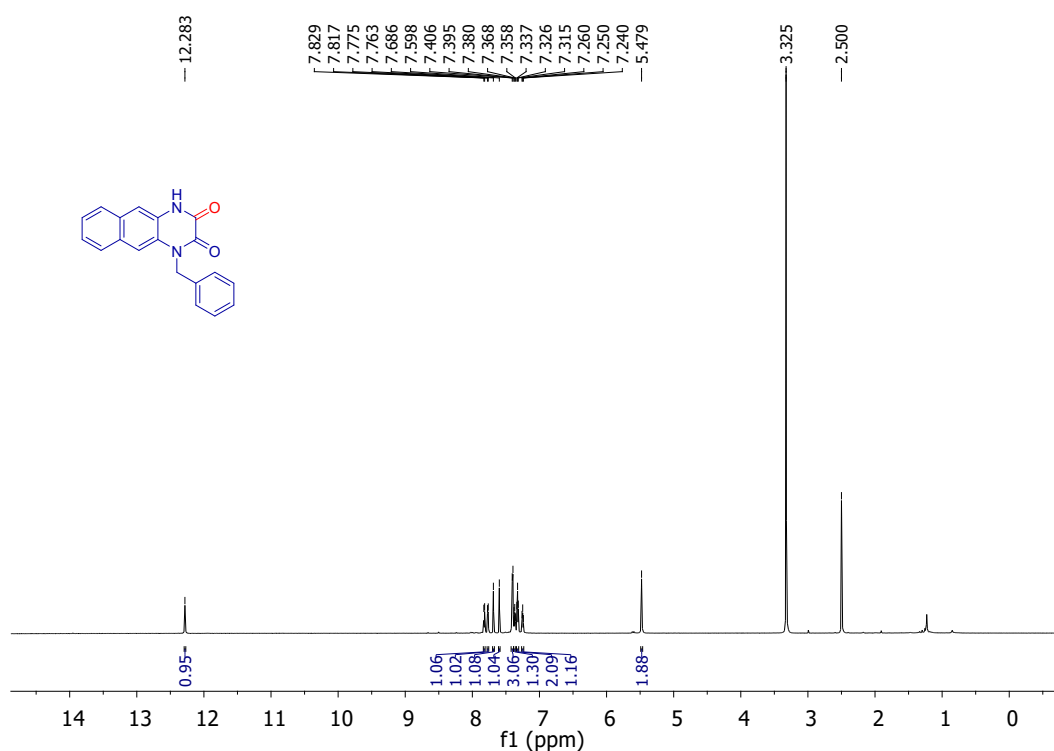

**Figure S63.**  $^1\text{H}$  NMR (700 MHz,  $\text{DMSO-}d_6$ ) spectrum of 1-benzyl-1,4-dihydrobenzo[g]quinoxaline-2,3-dione (**2m**).

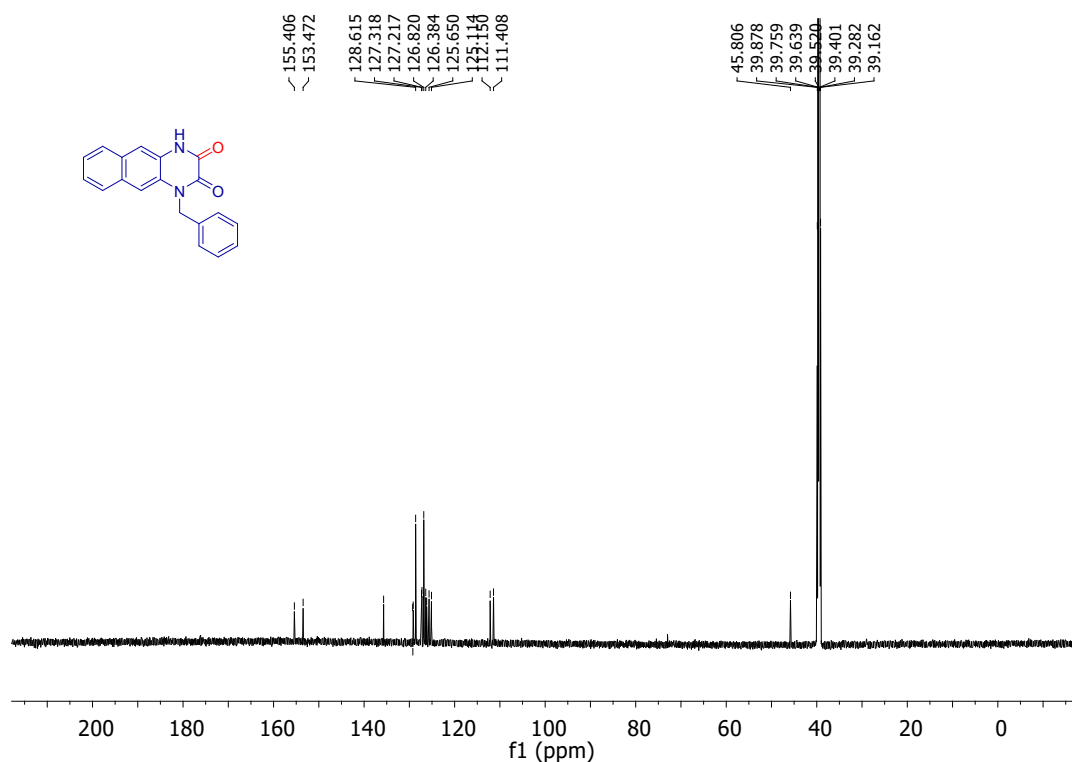

**Figure S64.**  $^{13}\text{C}\{^1\text{H}\}$  NMR (175 MHz,  $\text{DMSO-}d_6$ ) spectrum of 1-benzyl-1,4-dihydrobenzo[g]quinoxaline-2,3-dione (**2m**).

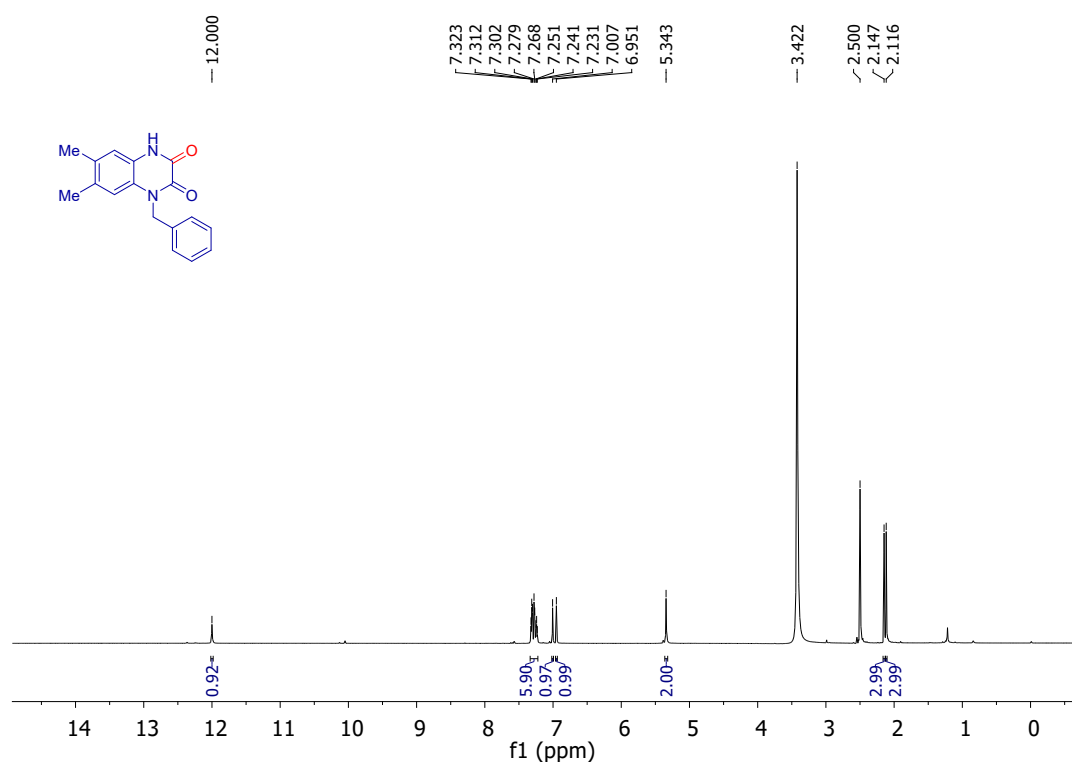

**Figure S65.**  $^1\text{H}$  NMR (700 MHz,  $\text{DMSO-}d_6$ ) spectrum of 1-benzyl-6,7-dimethyl-1,4-dihydroquinoxaline-2,3-dione **3a**).

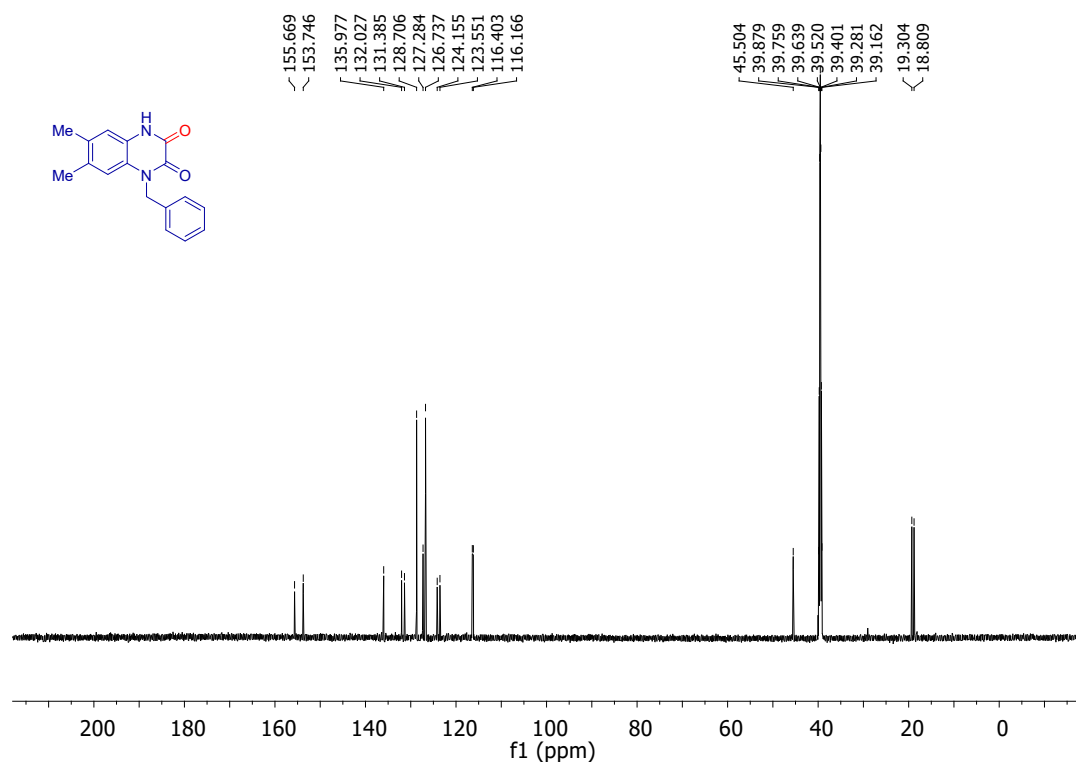

**Figure S66.**  $^{13}\text{C}\{^1\text{H}\}$  NMR (175 MHz,  $\text{DMSO-}d_6$ ) spectrum of 1-benzyl-6,7-dimethyl-1,4-dihydroquinoxaline-2,3-dione (**3a**).

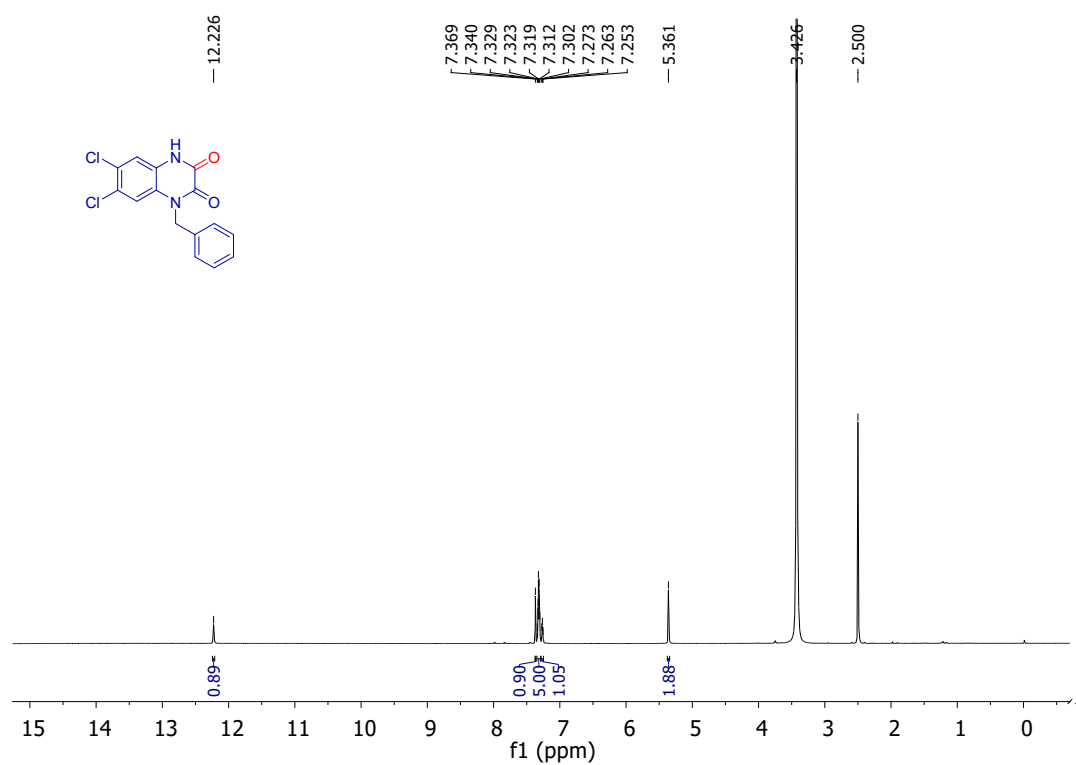

**Figure S67.**  $^1\text{H}$  NMR (700 MHz,  $\text{DMSO-}d_6$ ) spectrum of 1-benzyl-6,7-dichloro-1,4-dihydroquinoxaline-2,3-dione (**3b**).

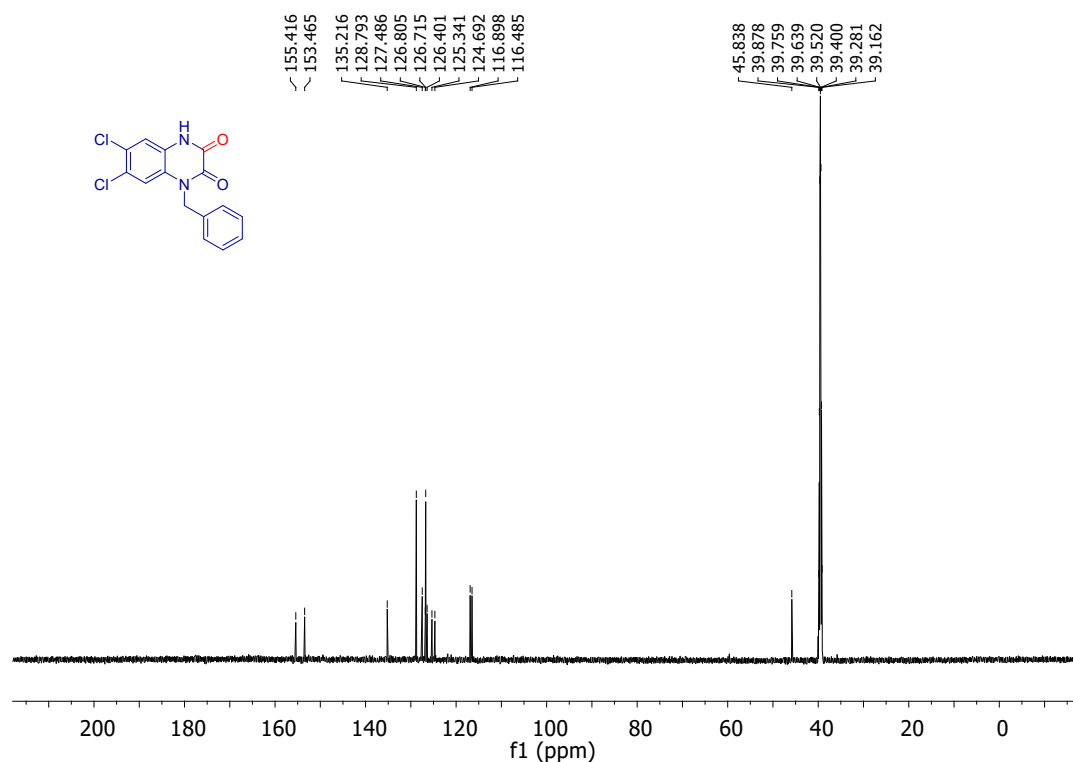

**Figure S68.**  $^{13}\text{C}\{^1\text{H}\}$  NMR (175 MHz,  $\text{DMSO-}d_6$ ) spectrum of 1-benzyl-6,7-dichloro-1,4-dihydroquinoxaline-2,3-dione (**3b**).

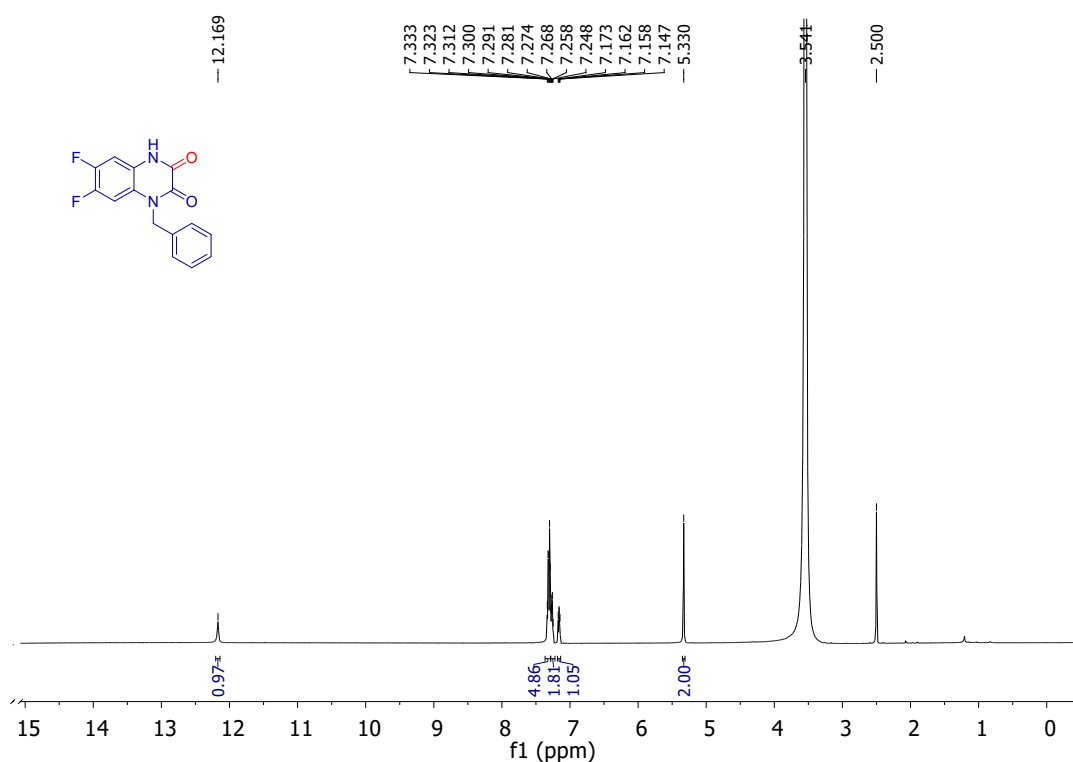

**Figure S69.**  $^1\text{H}$  NMR (700 MHz,  $\text{DMSO-}d_6$ ) spectrum of 1-benzyl-6,7-difluoro-1,4-dihydroquinoxaline-2,3-dione (**3c**).

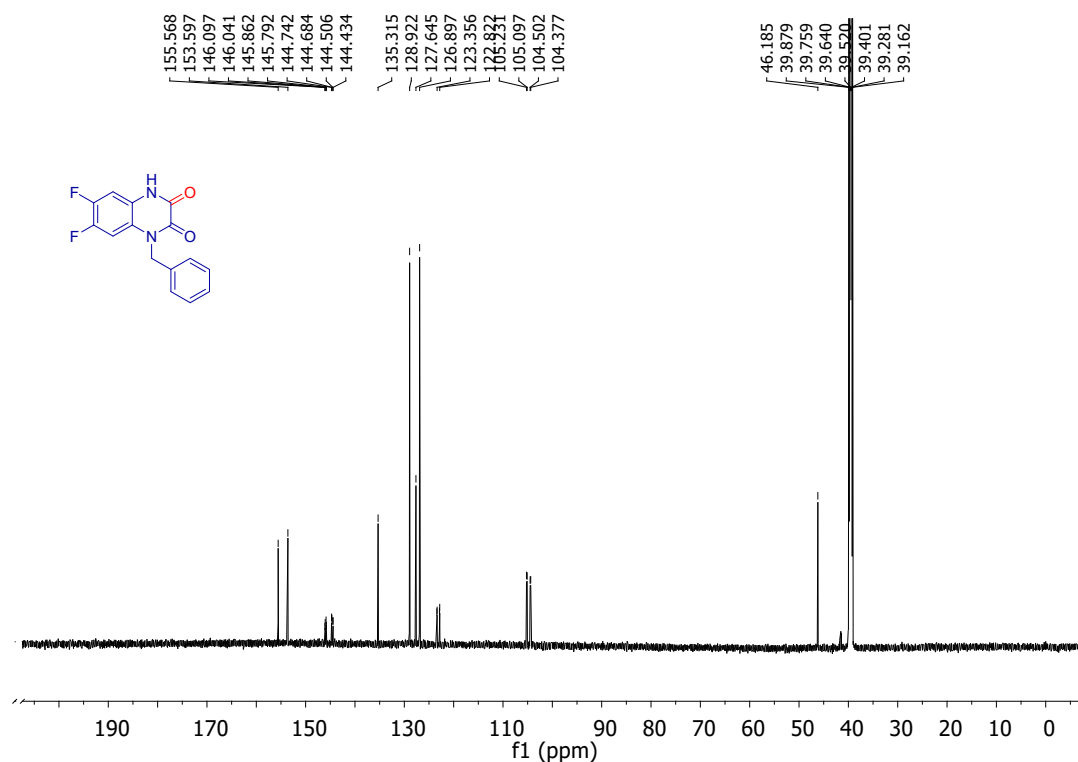

**Figure S70.**  $^{13}\text{C}\{^1\text{H}\}$  NMR (175 MHz,  $\text{DMSO-}d_6$ ) spectrum of 1-benzyl-6,7-difluoro-1,4-dihydroquinoxaline-2,3-dione (**3c**).

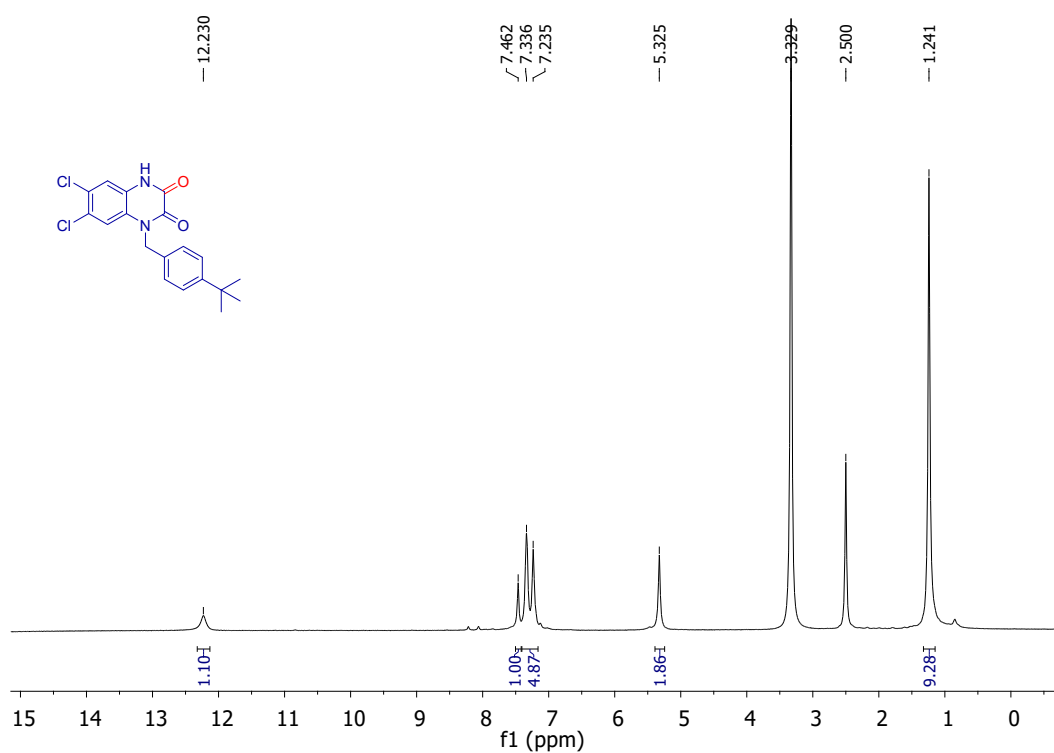

**Figure S71.**  $^1\text{H}$  NMR (700 MHz,  $\text{DMSO-}d_6$ ) spectrum of 1-(4-(*tert*-butyl)benzyl)-6,7-dichloro-1,4-dihydroquinoxaline-2,3-dione (**3d**).

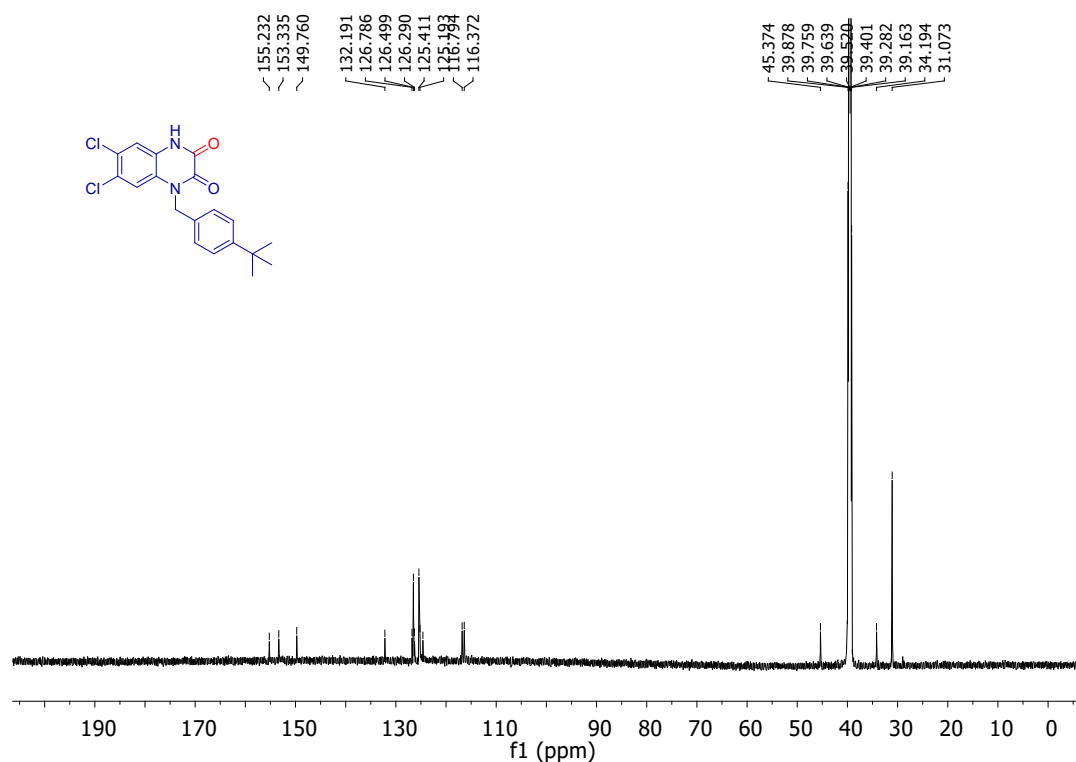

**Figure S72.**  $^{13}\text{C}\{^1\text{H}\}$  NMR (175 MHz,  $\text{DMSO-}d_6$ ) spectrum of 1-(4-(*tert*-butyl)benzyl)-6,7-dichloro-1,4-dihydroquinoxaline-2,3-dione (**3d**).

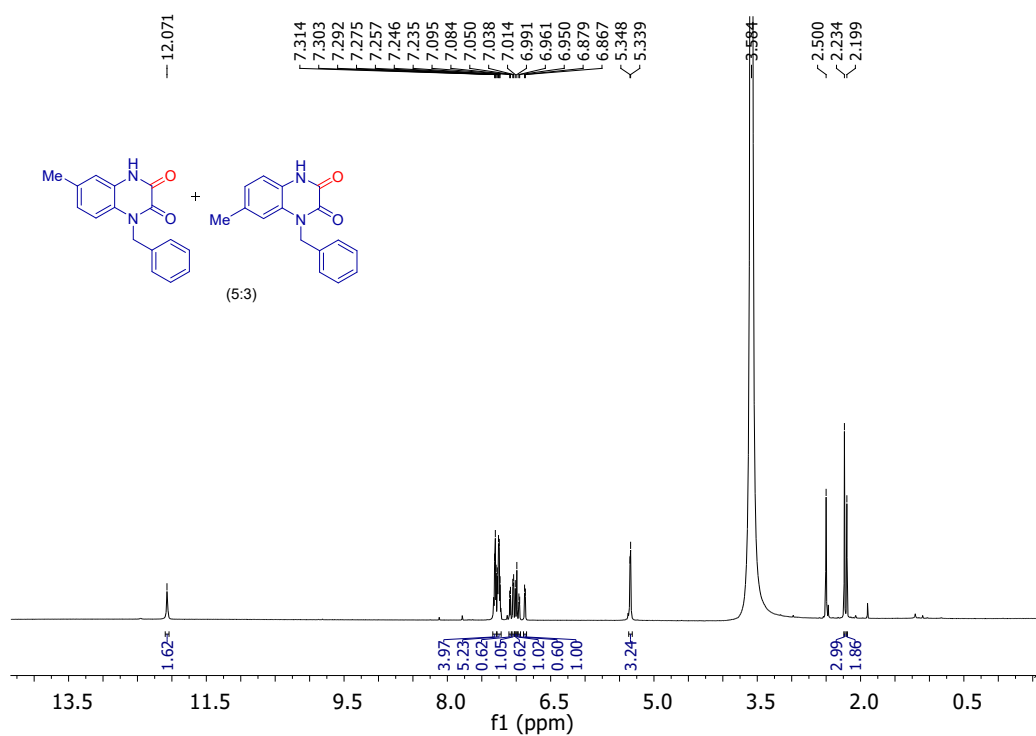

**Figure S73.**  $^1\text{H}$  NMR (700 MHz,  $\text{DMSO-}d_6$ ) spectrum of 1-benzyl-6-methyl-1,4-dihydroquinoxaline-2,3-dione and 1-benzyl-7-methyl-1,4-dihydroquinoxaline-2,3-dione (**3e**).

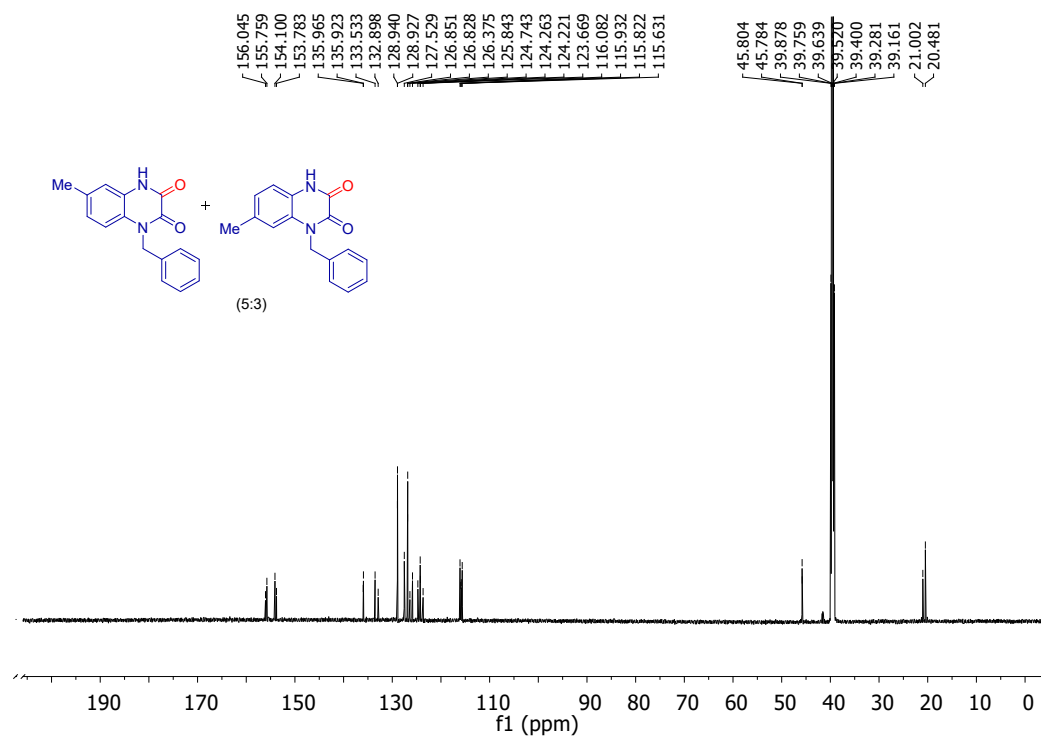

**Figure S74.**  $^{13}\text{C}\{^1\text{H}\}$  NMR (175 MHz,  $\text{DMSO-}d_6$ ) spectrum of 1-benzyl-6-methyl-1,4-dihydroquinoxaline-2,3-dione and 1-benzyl-7-methyl-1,4-dihydroquinoxaline-2,3-dione (**3e**).

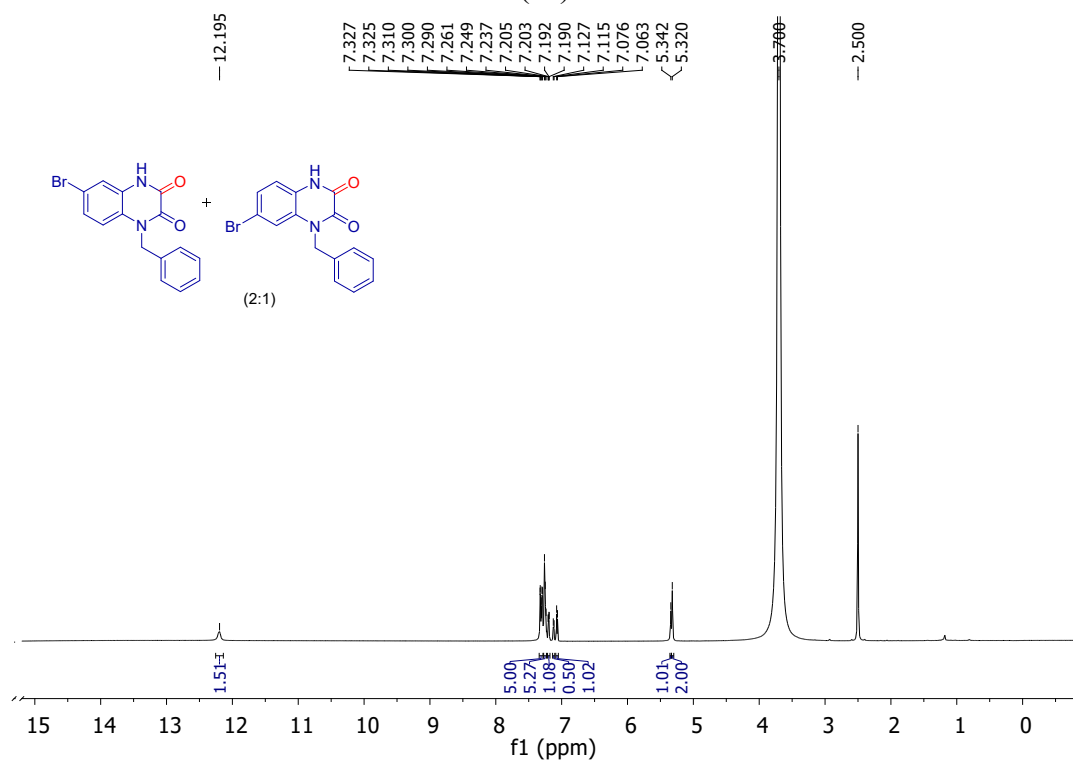

**Figure S75.**  $^1\text{H}$  NMR (700 MHz,  $\text{DMSO-}d_6$ ) spectrum of 1-benzyl-6-bromo-1,4-dihydroquinoxaline-2,3-dione and 1-benzyl-7-bromo-1,4-dihydroquinoxaline-2,3- (**3f**).

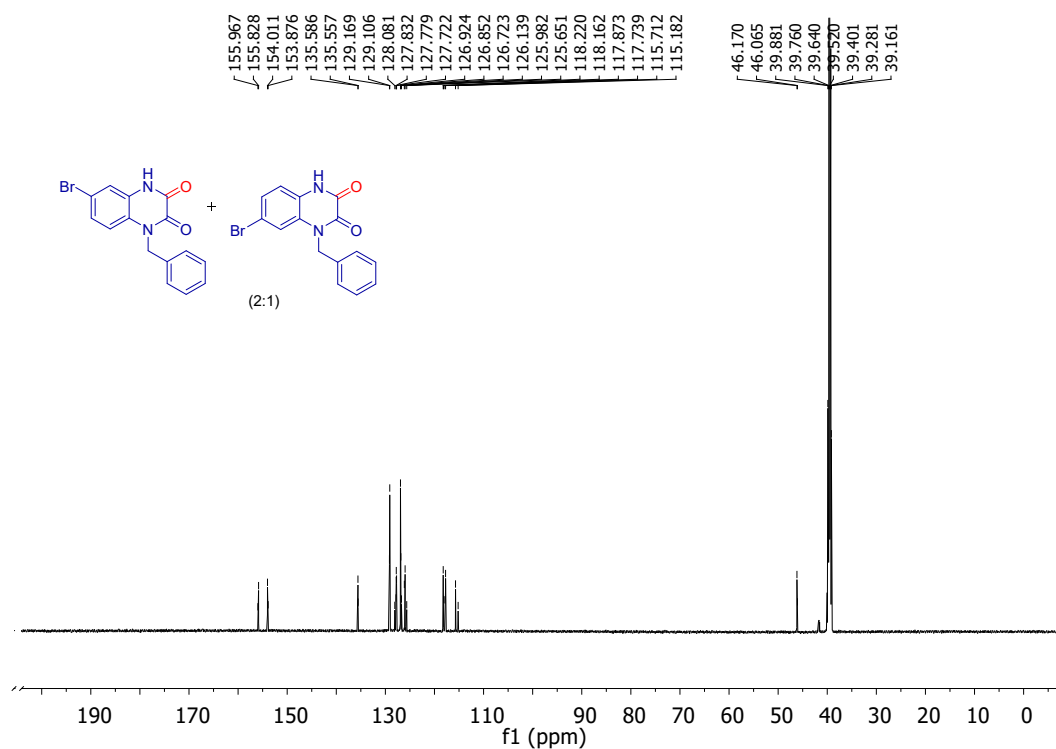

**Figure S76.**  $^{13}\text{C}\{^1\text{H}\}$  NMR (175 MHz,  $\text{DMSO-}d_6$ ) spectrum of 1-benzyl-6-bromo-1,4-dihydroquinoxaline-2,3-dione and 1-benzyl-7-bromo-1,4-dihydroquinoxaline-2,3-dione (**3f**).

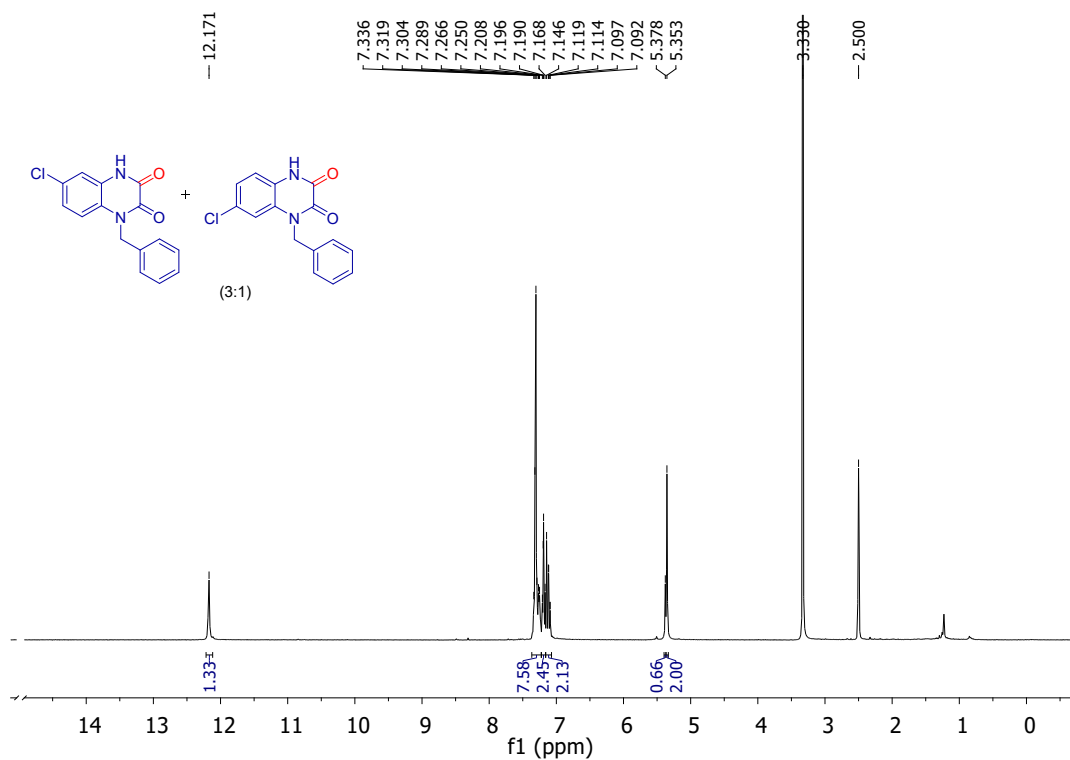



**Figure S77.**  $^1\text{H}$  NMR (400 MHz,  $\text{DMSO-}d_6$ ) spectrum of 1-benzyl-6-chloro-1,4-dihydroquinoxaline-2,3-dione and 1-benzyl-7-chloro-1,4-dihydroquinoxaline-2,3-dione (**3g**).

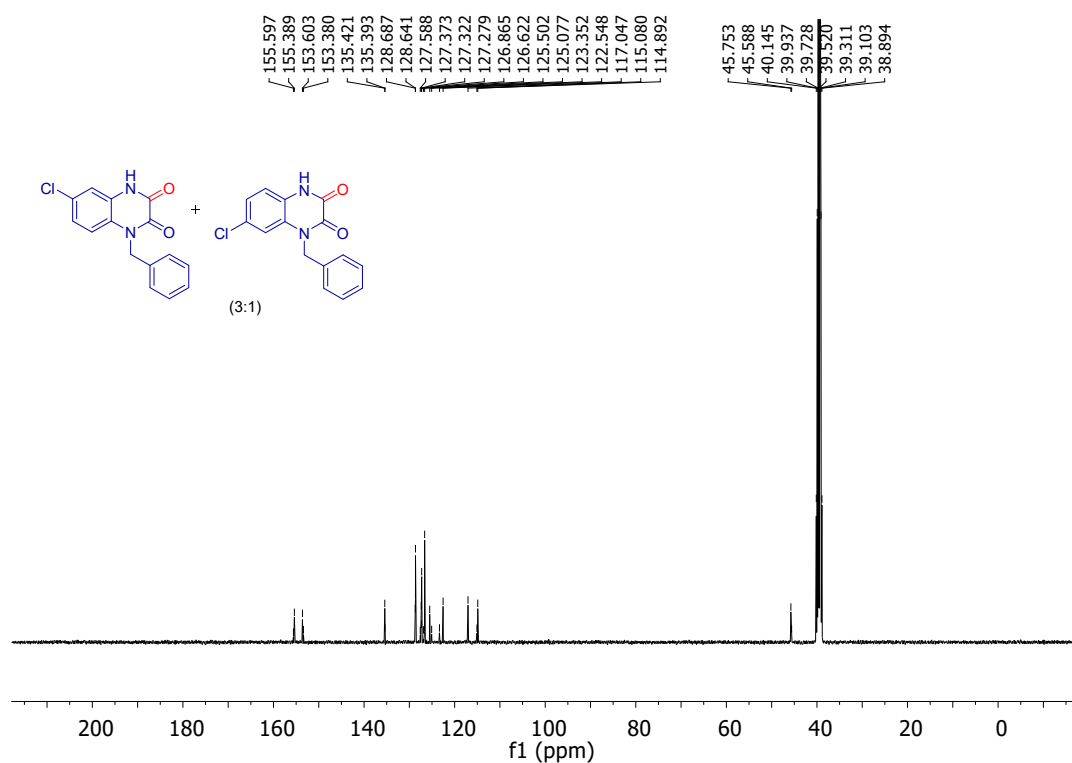

**Figure S78.**  $^{13}\text{C}\{^1\text{H}\}$  NMR (100 MHz,  $\text{DMSO-}d_6$ ) spectrum of 1-benzyl-6-chloro-1,4-dihydroquinoxaline-2,3-dione and 1-benzyl-7-chloro-1,4-dihydroquinoxaline-2,3-dione (**3g**).

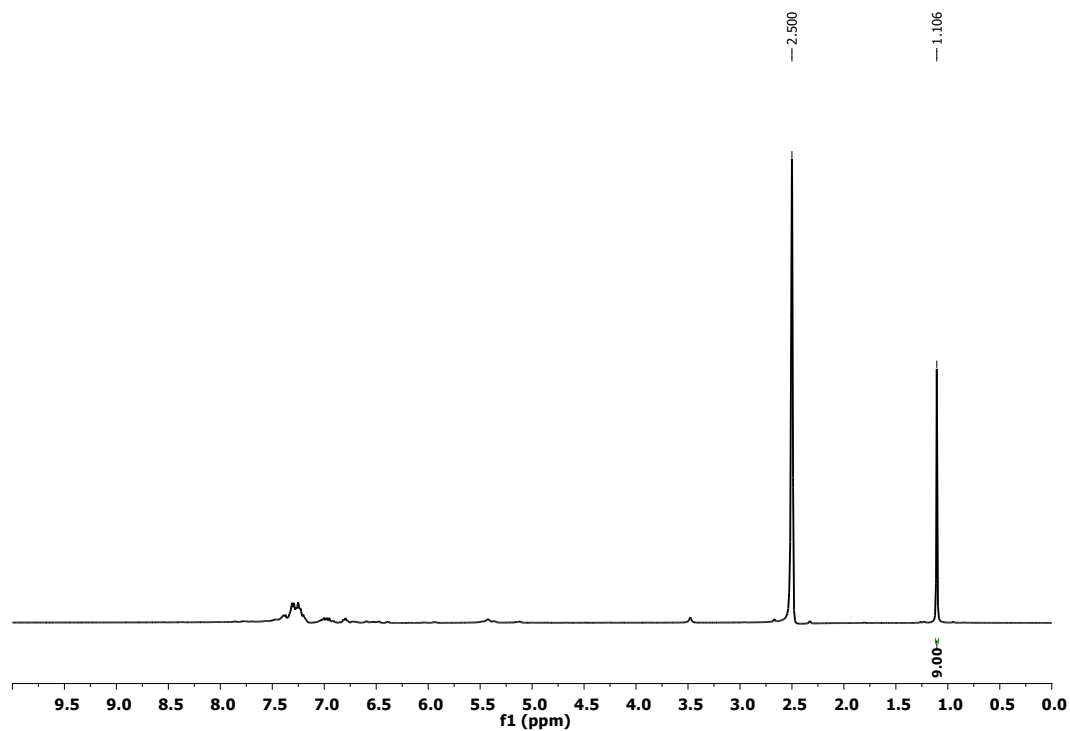

**Figure S79.**  $^1\text{H}$  NMR (400 MHz,  $\text{DMSO-}d_6$ ) spectrum of 1-benzylquinoxalin-2(1*H*)-one (**1a**) in presence of potassium *tert*-butoxide.

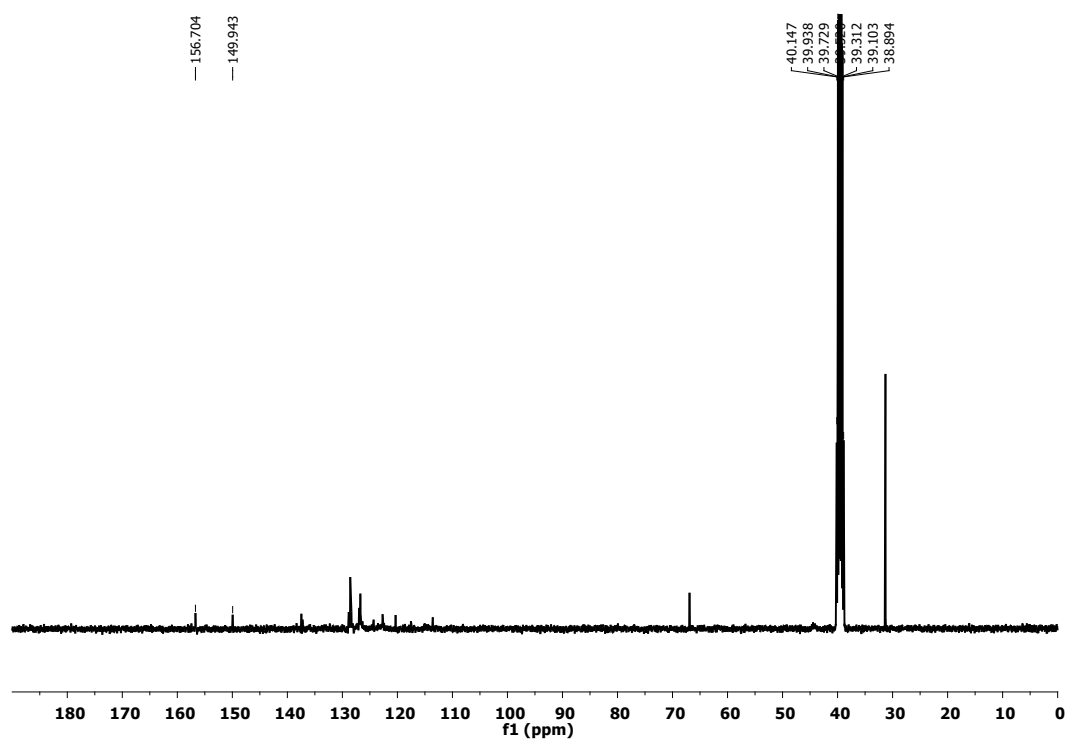

**Figure S80.**  $^{13}\text{C}\{^1\text{H}\}$  NMR (100 MHz,  $\text{DMSO-}d_6$ ) spectrum of 1-benzylquinoxalin-2(1*H*)-one (**1a**) in presence of potassium *tert*-butoxide.

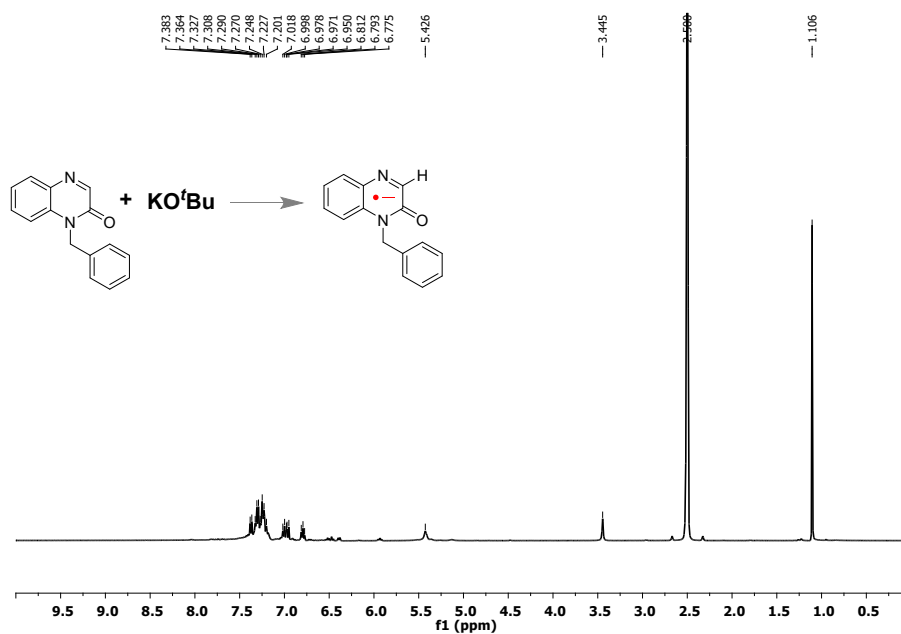

**Figure S81.**  $^1\text{H}$  NMR (400 MHz,  $\text{DMSO-}d_6$ ) spectrum of 1-benzylquinoxalin-2(1*H*)-one radical anion after 12 h under Ar atmosphere.

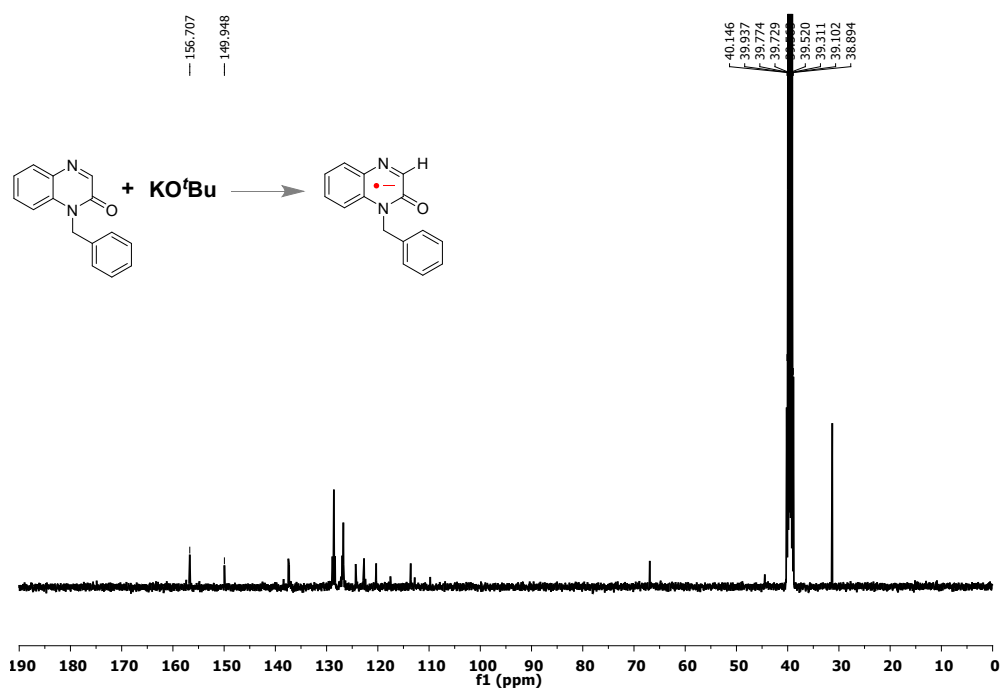

**Figure S82.**  $^{13}\text{C}\{^1\text{H}\}$  NMR (100 MHz,  $\text{DMSO-}d_6$ ) spectrum of 1-benzylquinoxalin-2(1*H*)-one radical anion after 12 h under Ar atmosphere.

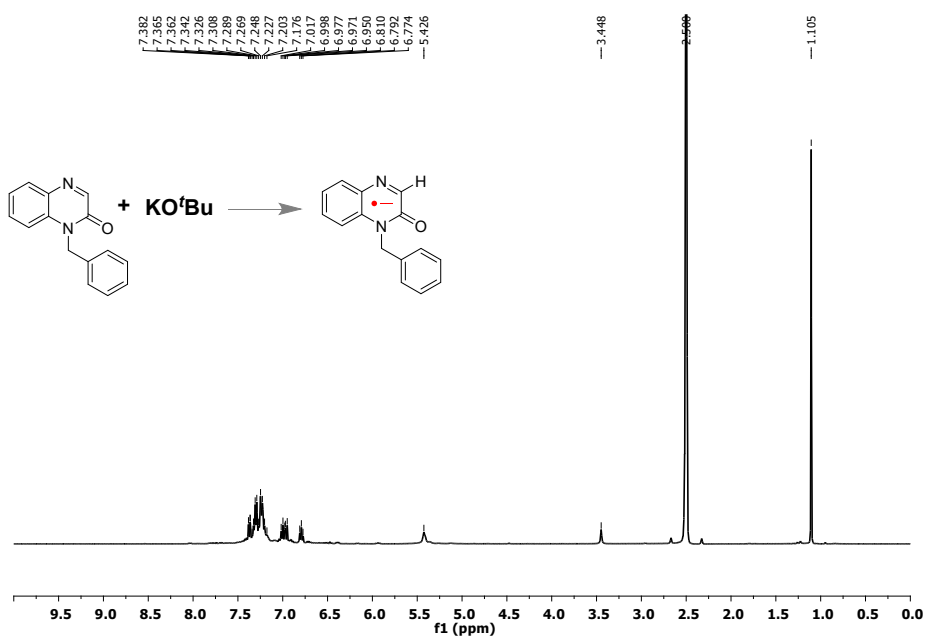

**Figure S83.**  $^1\text{H}$  NMR (400 MHz,  $\text{DMSO-}d_6$ ) spectrum of 1-benzylquinoxalin-2(1*H*)-one radical anion after 24 h under Ar atmosphere.

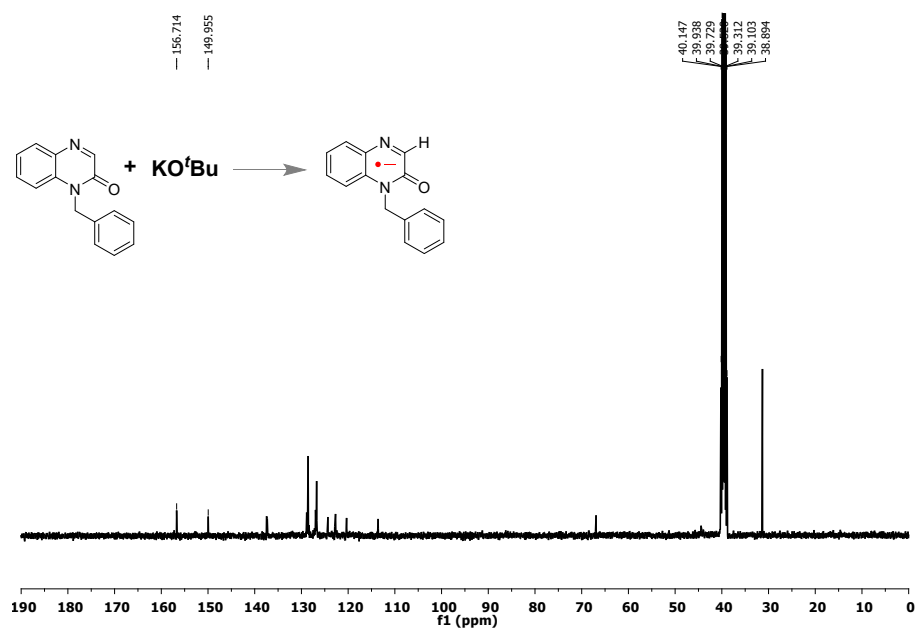

**Figure S84.**  $^{13}\text{C}\{^1\text{H}\}$  NMR (100 MHz,  $\text{DMSO-}d_6$ ) spectrum of 1-benzylquinoxalin-2(1*H*)-one radical anion after 24 h under Ar atmosphere.

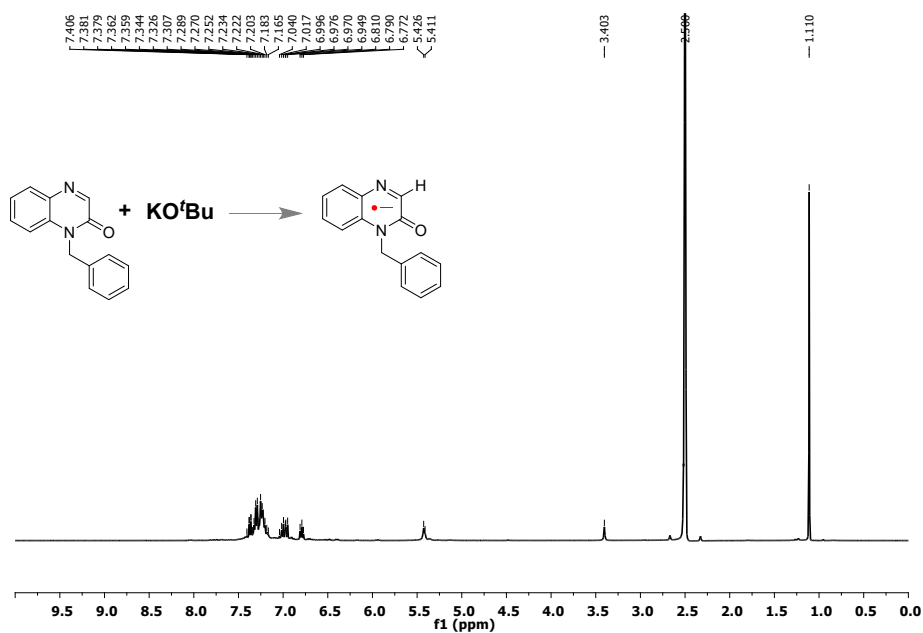

**Figure S85.**  $^1\text{H}$  NMR (400 MHz,  $\text{DMSO-}d_6$ ) spectrum of 1-benzylquinoxalin-2(1*H*)-one radical anion after 36 h under Ar atmosphere.

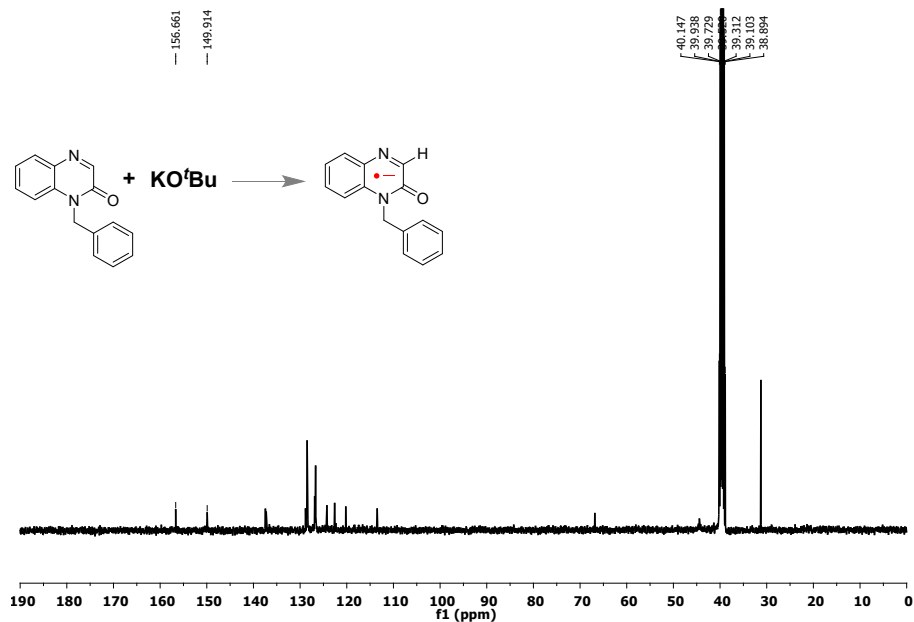

**Figure S86.**  $^{13}\text{C}\{^1\text{H}\}$  NMR (100 MHz,  $\text{DMSO-}d_6$ ) spectrum of 1-benzylquinoxalin-2(1*H*)-one radical anion after 36 h under Ar atmosphere.

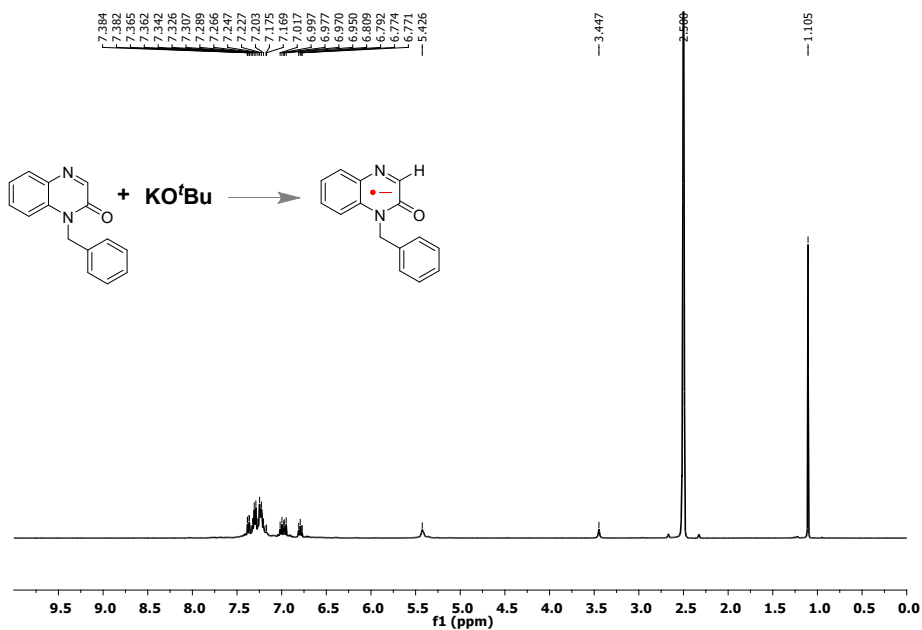

**Figure S87.**  $^1\text{H}$  NMR (400 MHz,  $\text{DMSO-}d_6$ ) spectrum of 1-benzylquinoxalin-2(1*H*)-one radical anion after 48 h under Ar atmosphere.

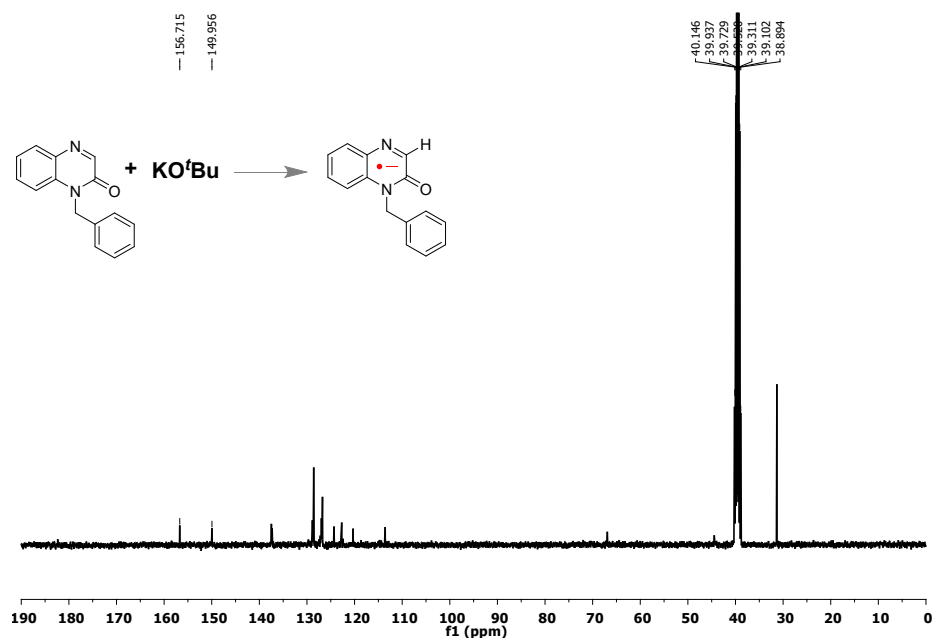

**Figure S88.**  $^{13}\text{C}\{^1\text{H}\}$  NMR (100 MHz,  $\text{DMSO-}d_6$ ) spectrum of 1-benzylquinoxalin-2(1*H*)-one radical anion after 48 h under Ar atmosphere.

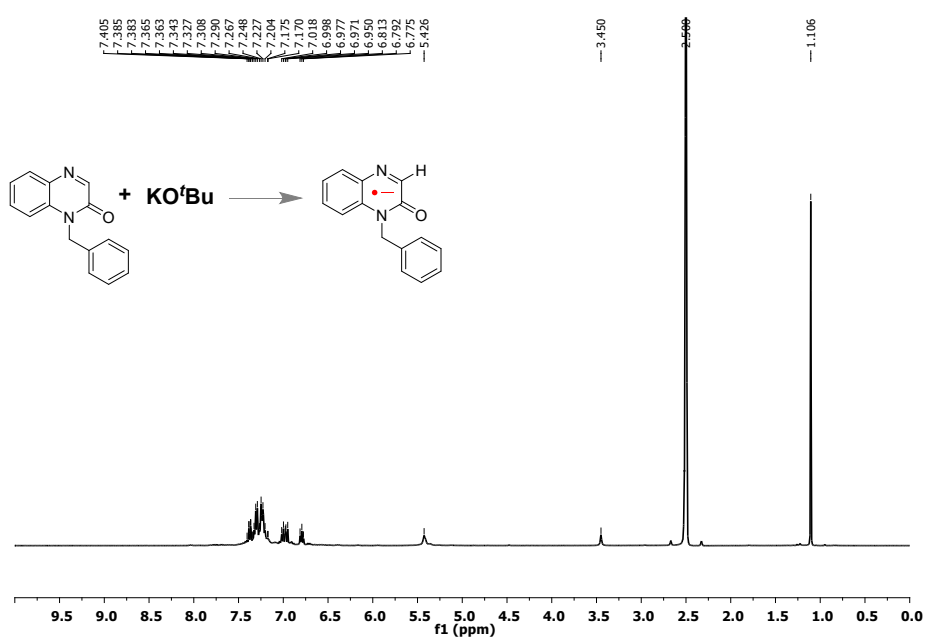

**Figure S89.**  $^1\text{H}$  NMR (400 MHz,  $\text{DMSO-}d_6$ ) spectrum of 1-benzylquinoxalin-2(1*H*)-one radical anion after 60 h under Ar atmosphere.

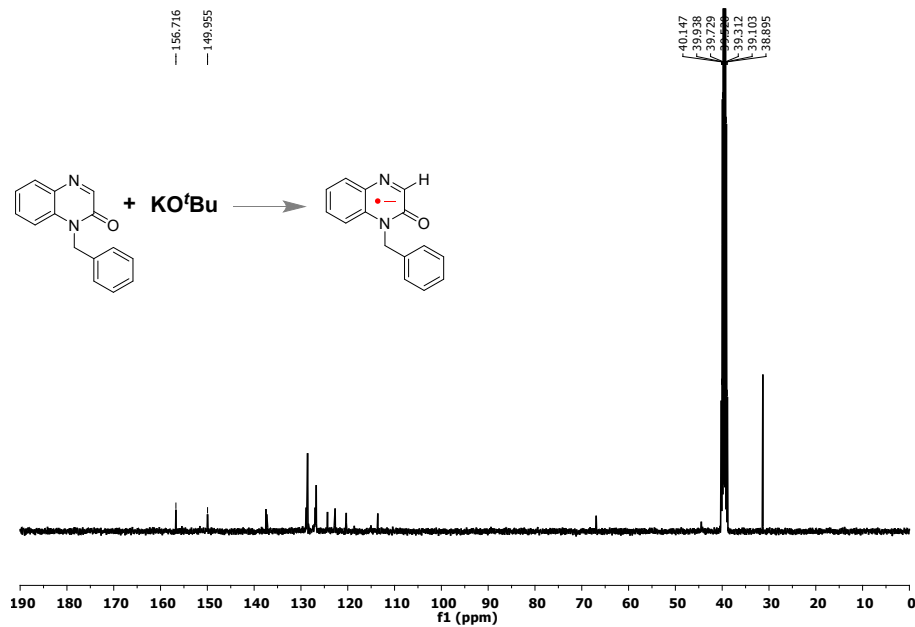

**Figure S90.**  $^{13}\text{C}\{^1\text{H}\}$  NMR (100 MHz,  $\text{DMSO-}d_6$ ) spectrum of 1-benzylquinoxalin-2(1*H*)-one radical anion after 60 h under Ar atmosphere.

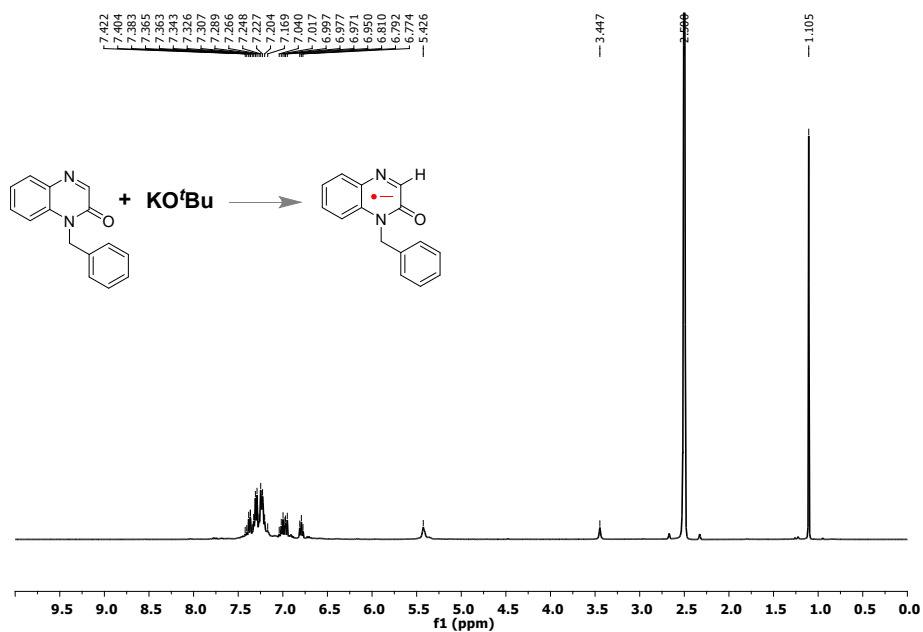

**Figure S91.**  $^1\text{H}$  NMR (100 MHz,  $\text{DMSO-}d_6$ ) spectrum of 1-benzylquinoxalin-2(1*H*)-one radical anion after 72 h under Ar atmosphere.

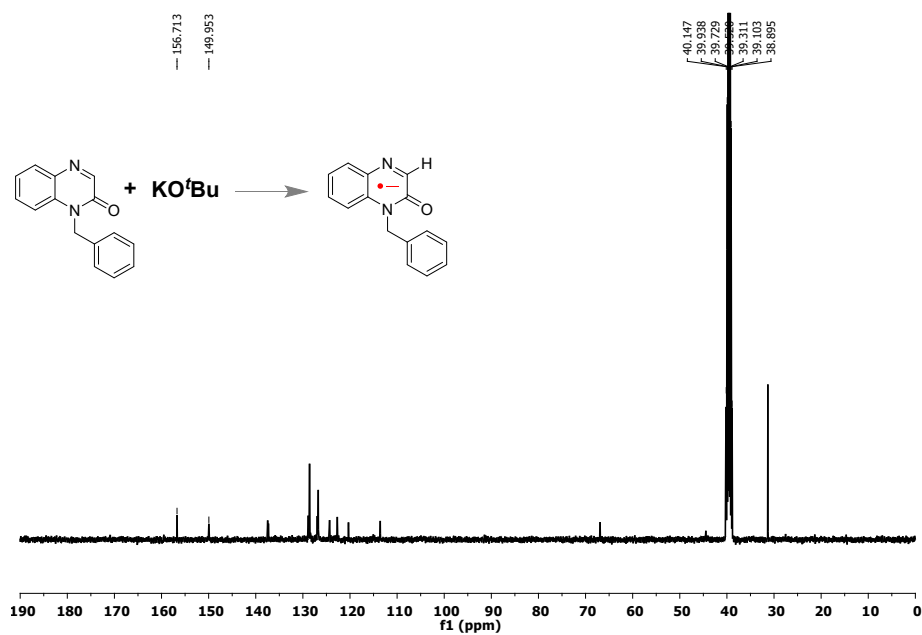

**Figure S92.**  $^{13}\text{C}\{^1\text{H}\}$  NMR (100 MHz,  $\text{DMSO-}d_6$ ) spectrum of 1-benzylquinoxalin-2(1*H*)-one radical anion after 72 h under Ar atmosphere.



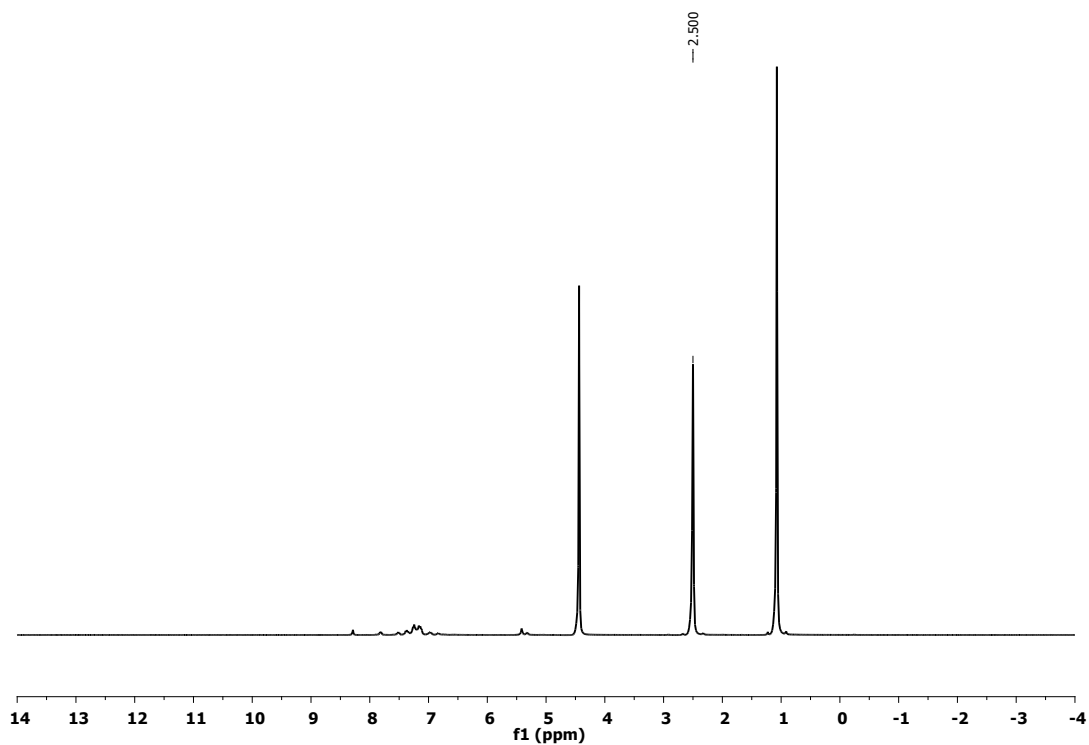

**Figure S93.** <sup>1</sup>H NMR (100 MHz, DMSO-*d*<sub>6</sub>) spectrum of the reaction under standard condition after the completion of reaction in presence of D<sub>2</sub>O.

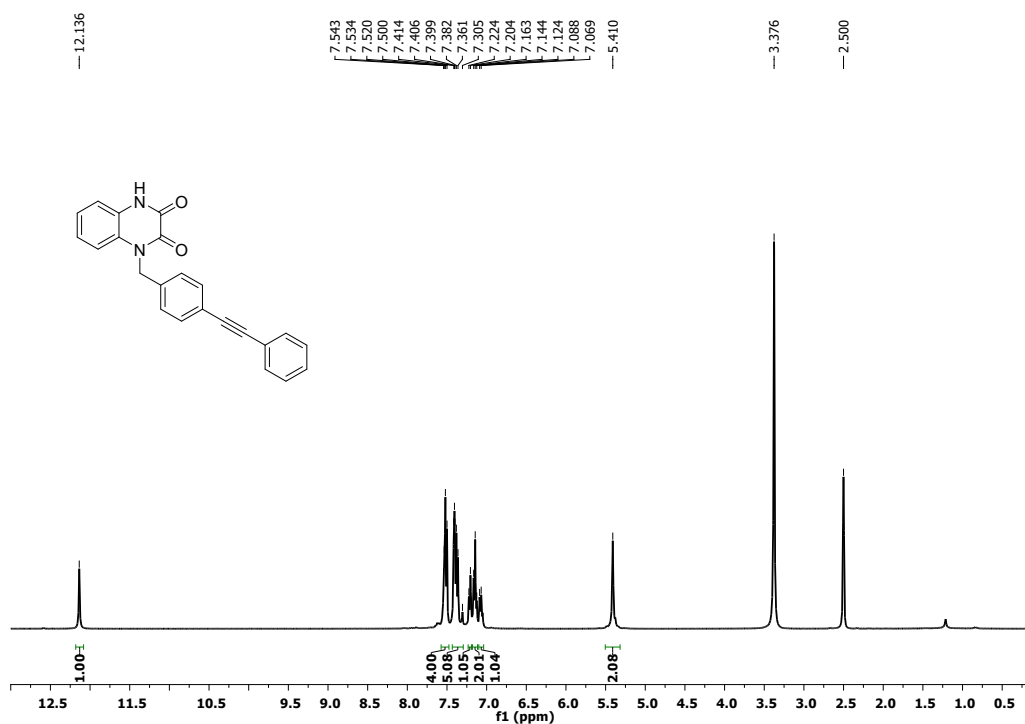

**Figure S94.** <sup>1</sup>H NMR (100 MHz, DMSO-*d*<sub>6</sub>) spectrum of 1-(4-(phenylethynyl)benzyl)-1,4-dihydroquinoxaline-2,3-dione.

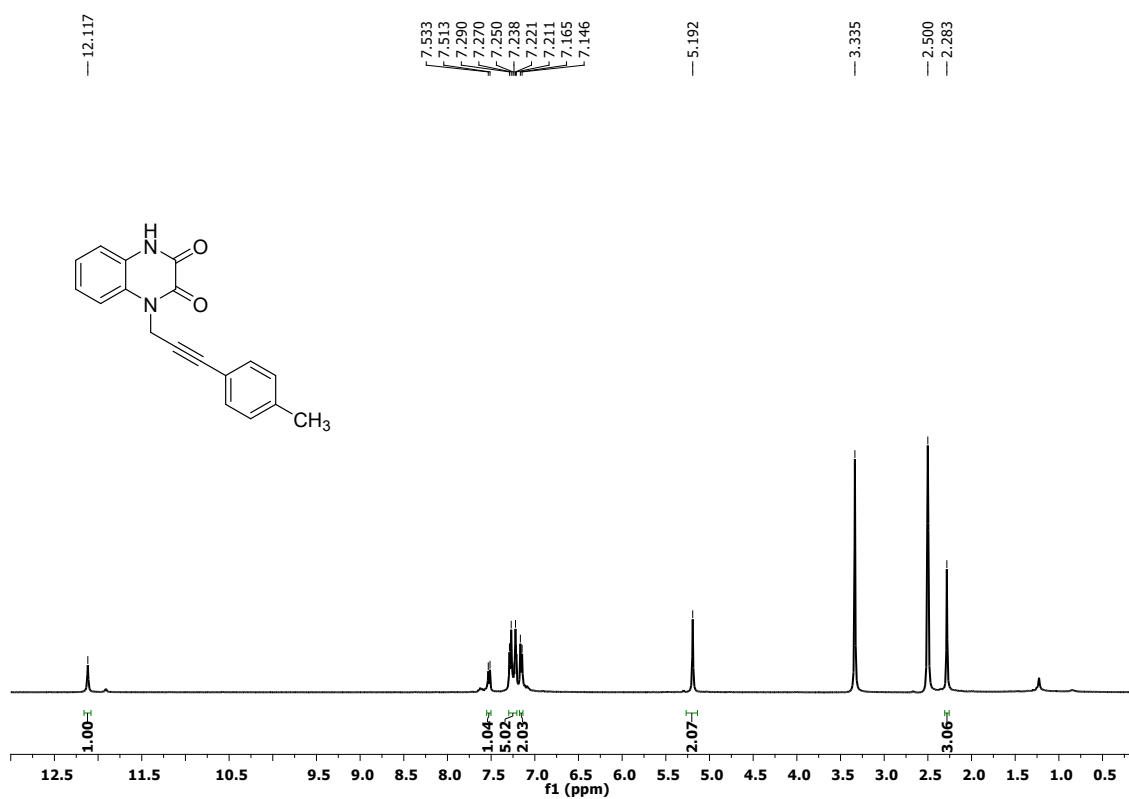

**Figure S95.** <sup>1</sup>H NMR (100 MHz, DMSO-*d*<sub>6</sub>) spectrum of 1-(3-(p-tolyl)prop-2-yn-1-yl)-1,4-dihydroquinoxaline-2,3-dione.

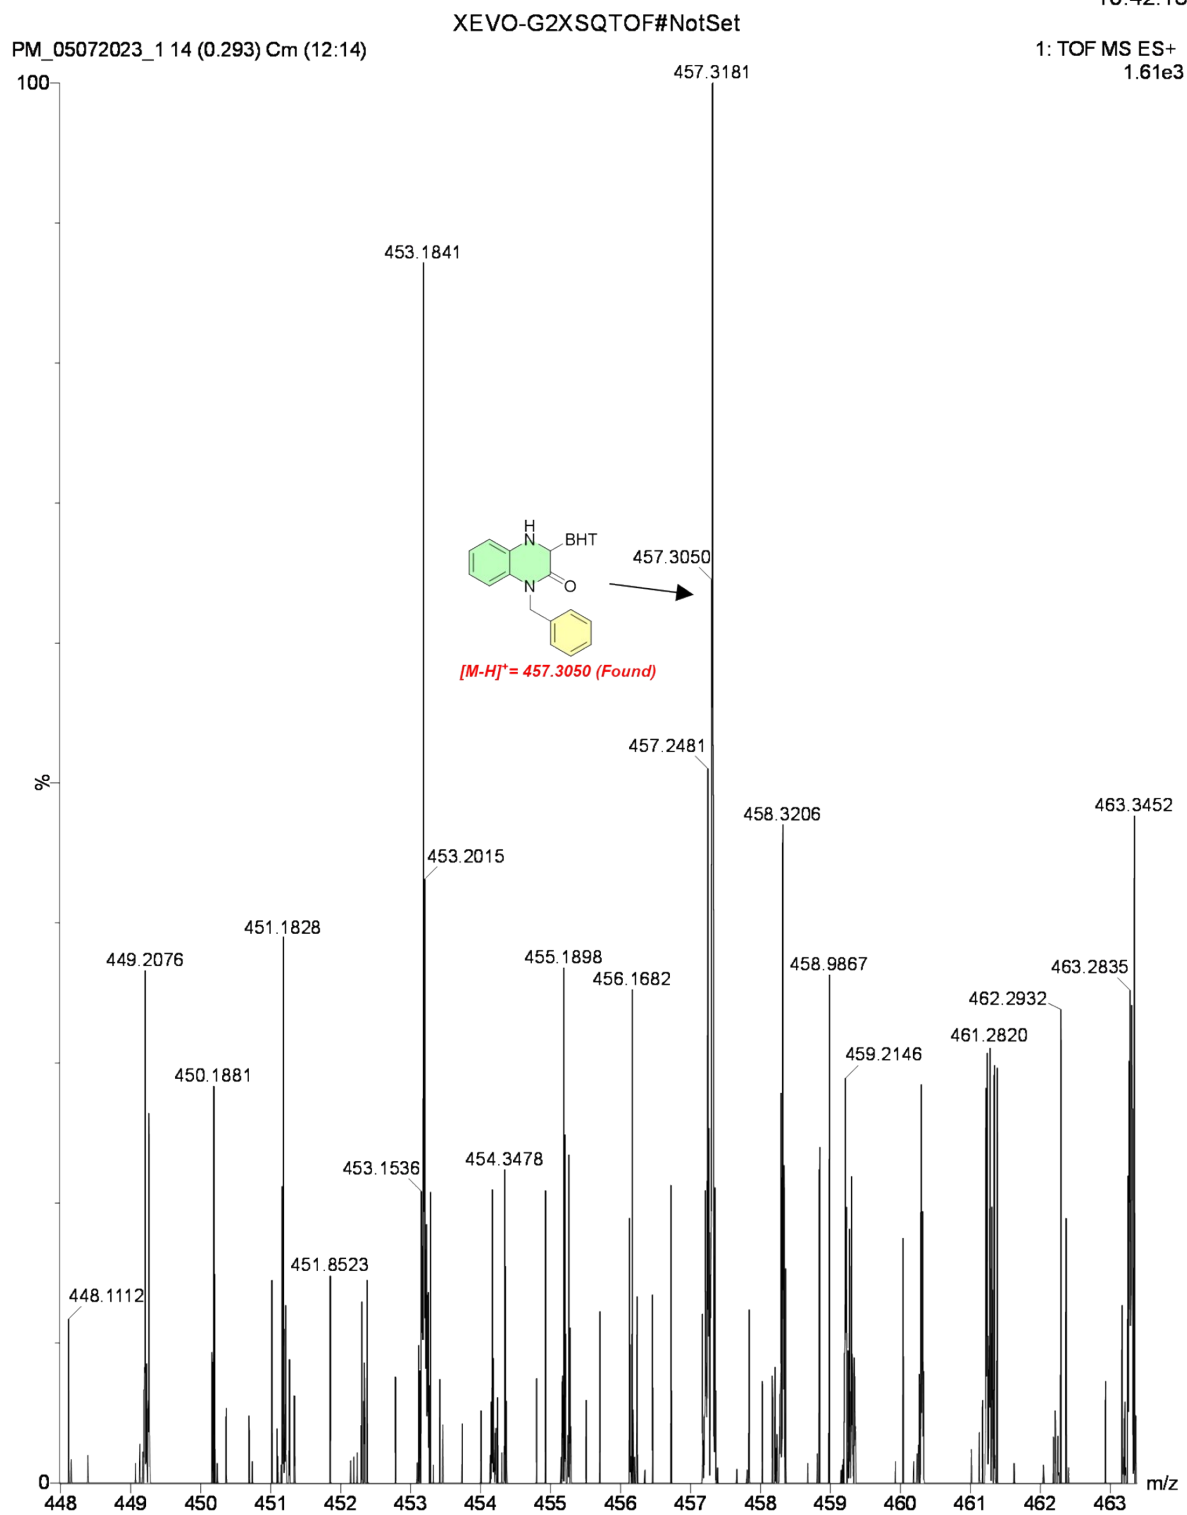

Figure S96. ESI-MS analysis with radical intermediate trapping experiment with BHT.

XEVO-G2XSQTOF#NotSet

PM\_05072023\_1 49 (0.984) Cm (39:49)

1: TOF MS ES+  
2.53e5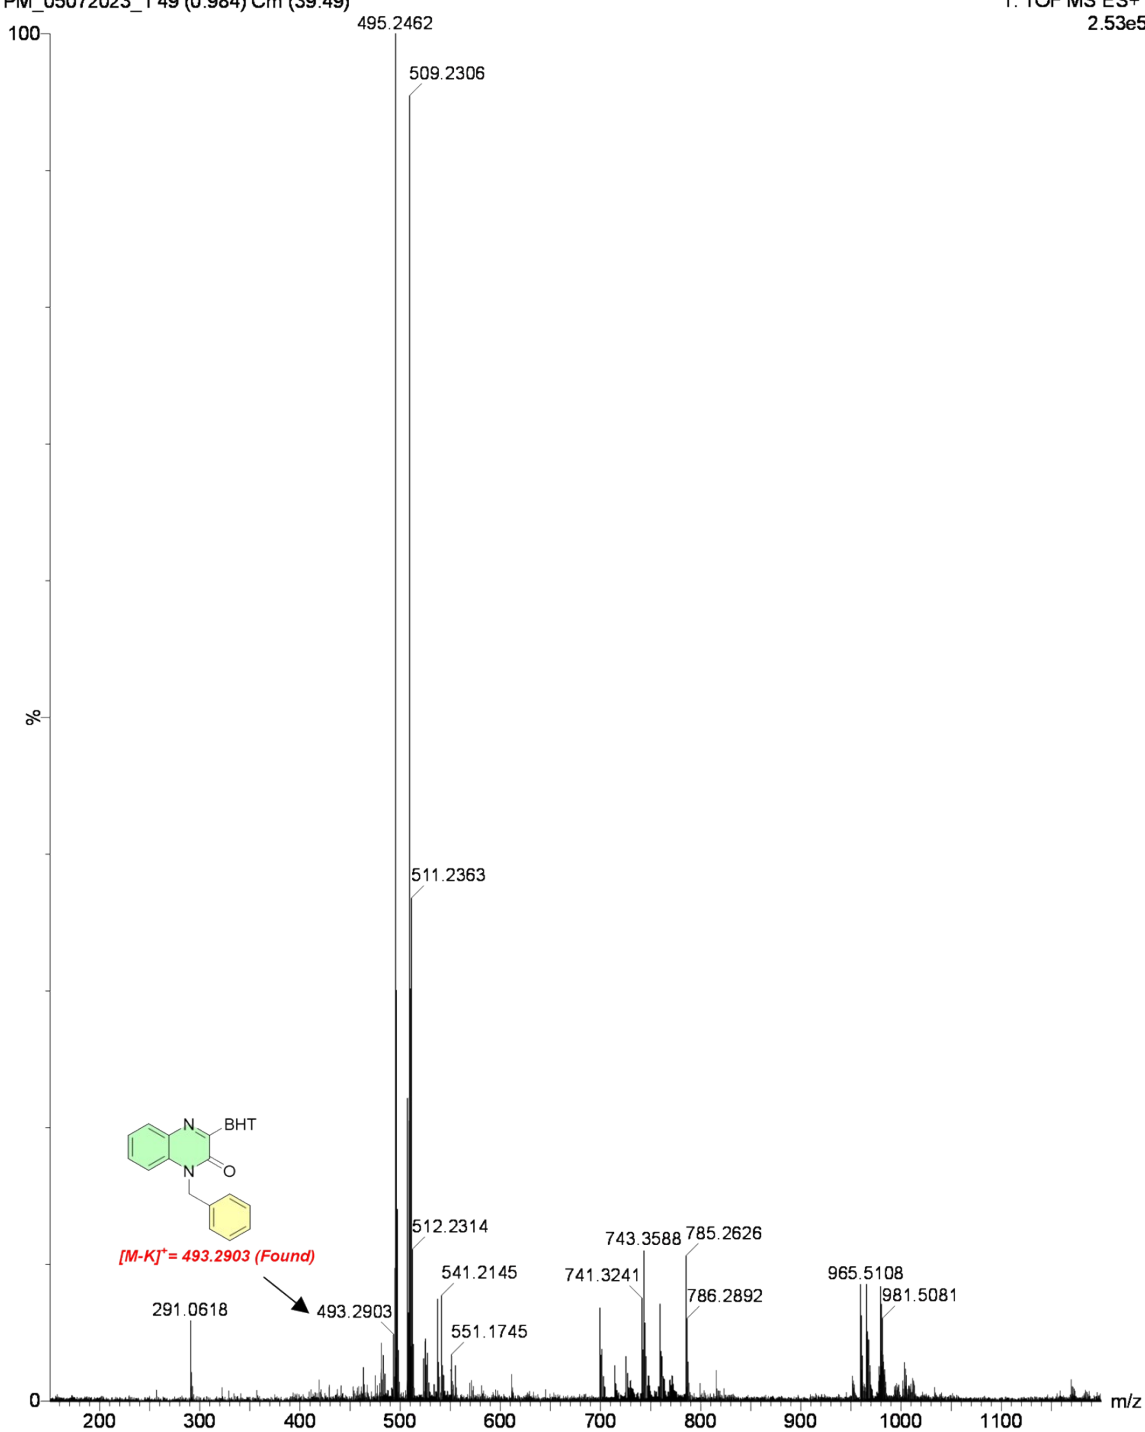**Figure S97.** ESI-MS analysis with radical trapping experiment with BHT.

XEVO-G2XSQTOF#NotSet

PM\_05072023\_1 (0.053) Cu (0.05); Is (1.00,1.00) C30H34N2O4Na

1: TOF MS ES+  
7.09e12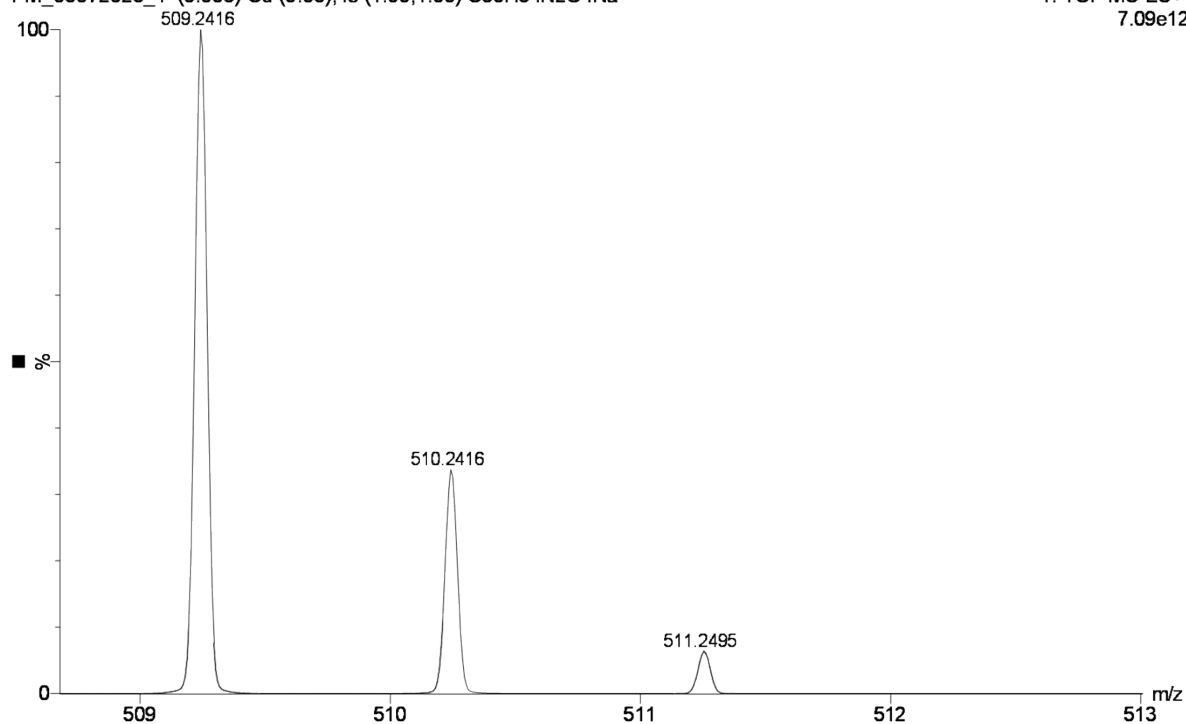

PM\_05072023\_1 14 (0.293) Cm (12:14)

1: TOF MS ES+  
6.55e4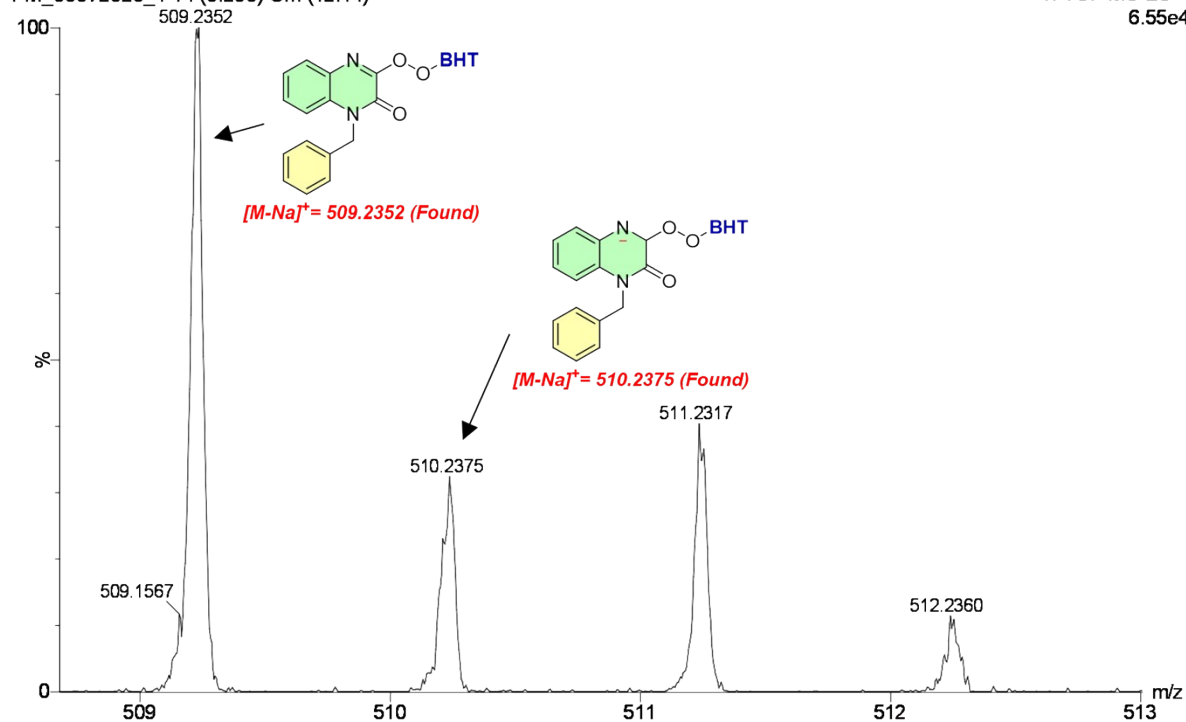**Figure S98.** ESI-MS analysis with radical trapping experiment with BHT.

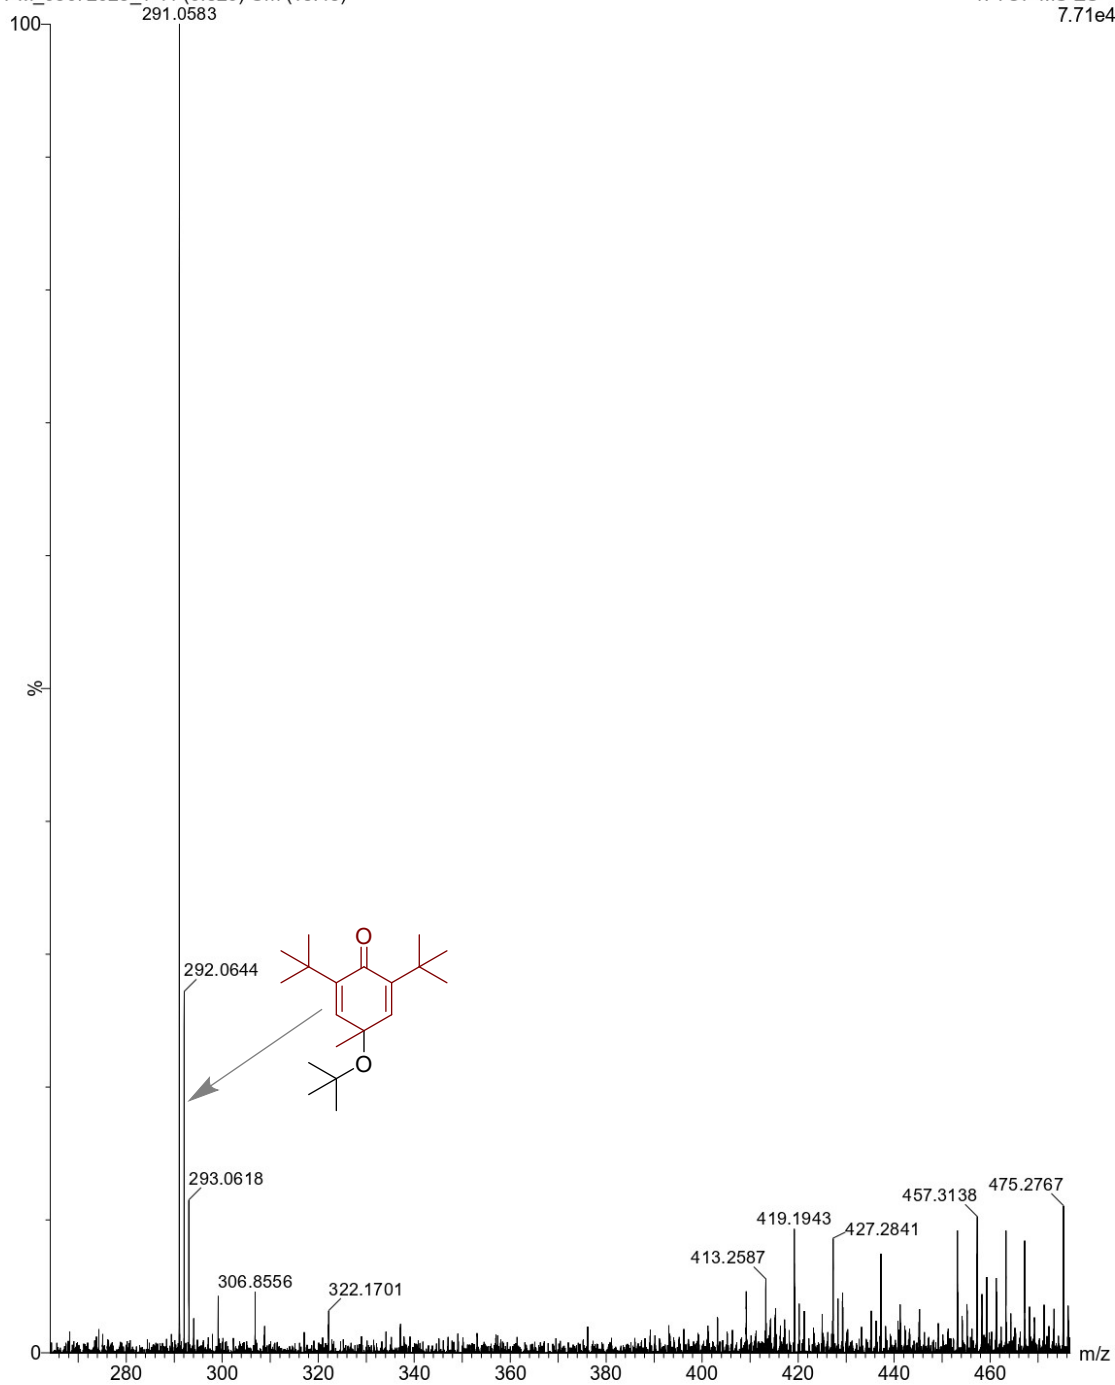

**Figure S99.** ESI-MS analysis with radical trapping experiment with BHT.

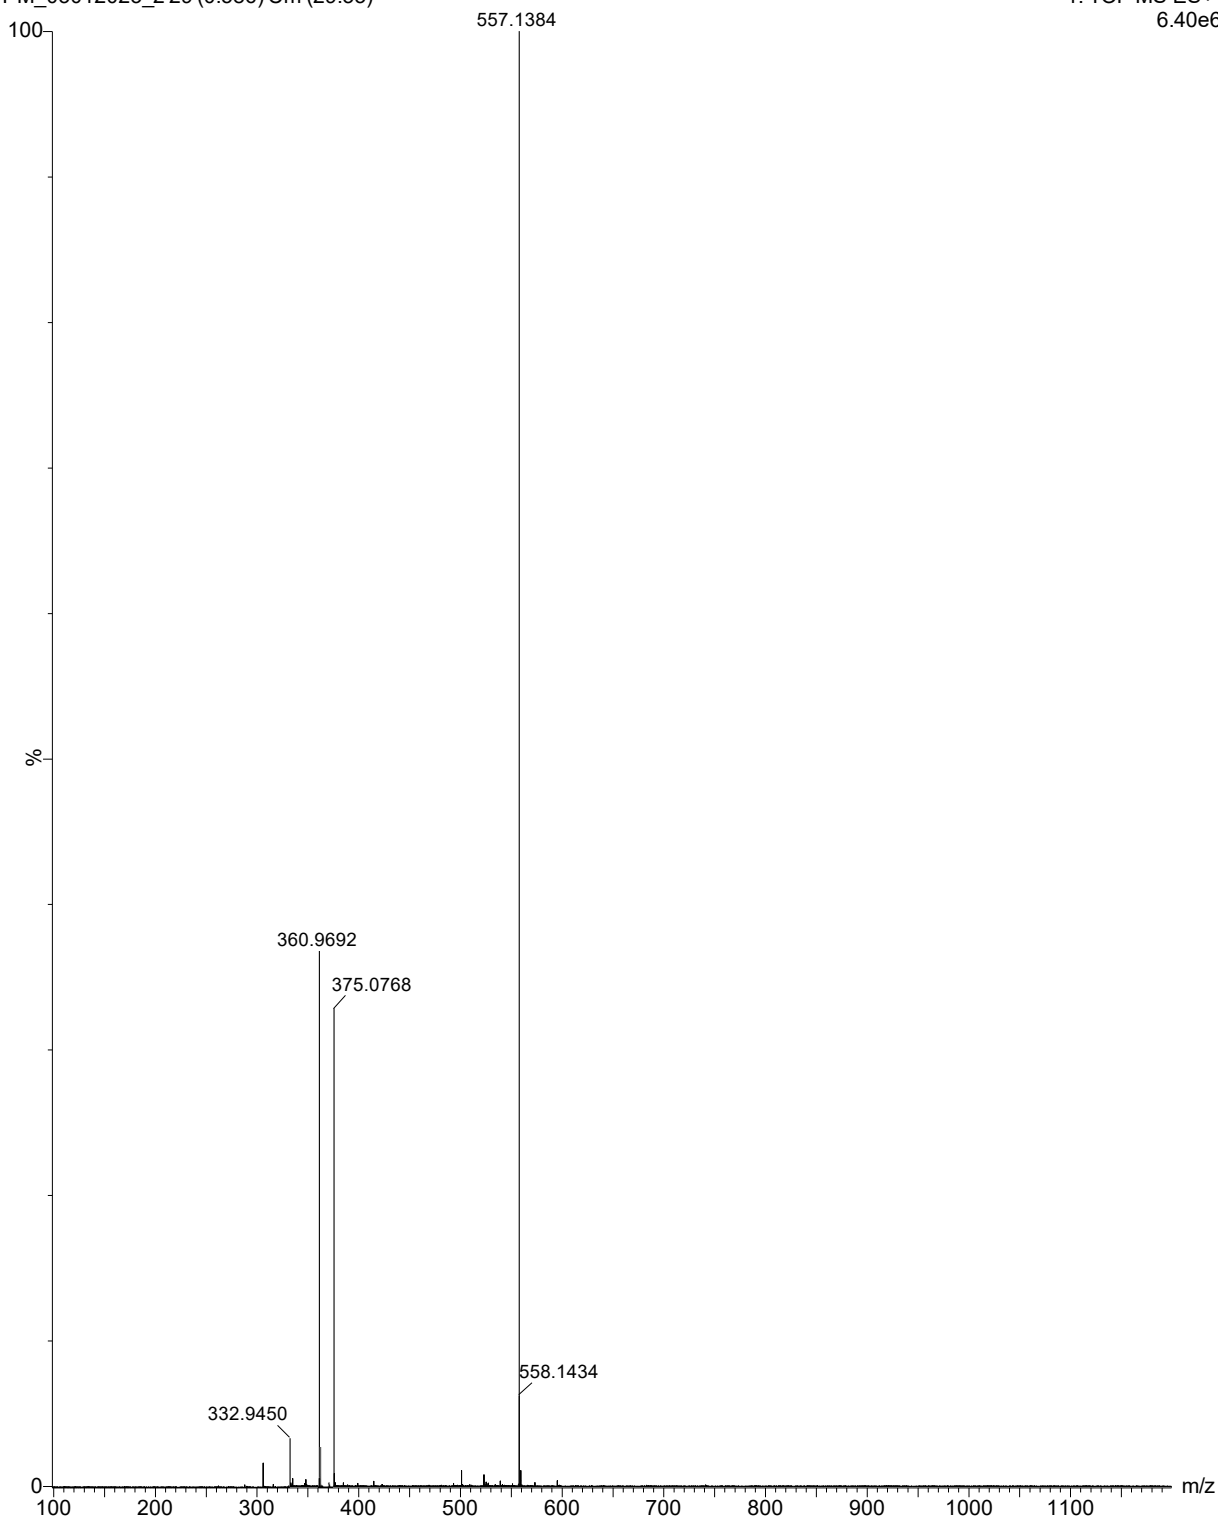

**Figure S100.** ESI-MS analysis of KO<sup>t</sup>Bu with BHT in DMSO.

PM\_SS\_D

05-Sep-2023  
12:51:25

XEVO-G2XSQTOF#NotSet

PM\_05092023\_2 (0.053) Cu (0.05); Is (1.00,1.00) C15H13N2O2

1: TOF MS ES+  
8.39e12

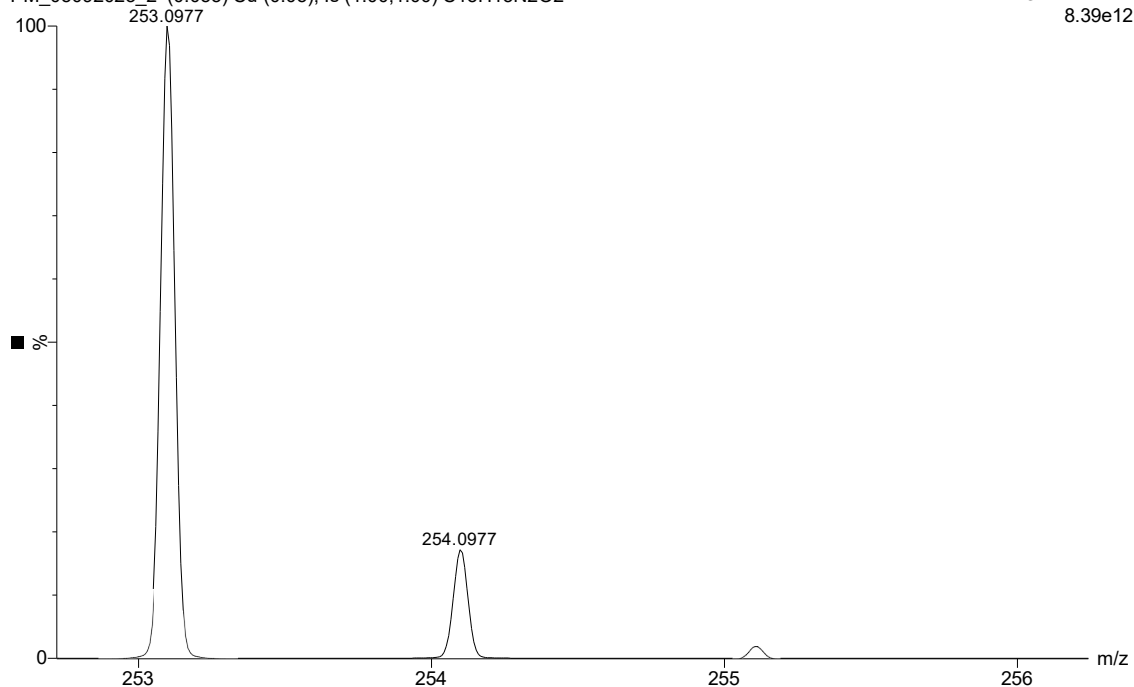

PM\_05092023\_2 29 (0.586) Cm (29:40)

1: TOF MS ES+  
1.56e4

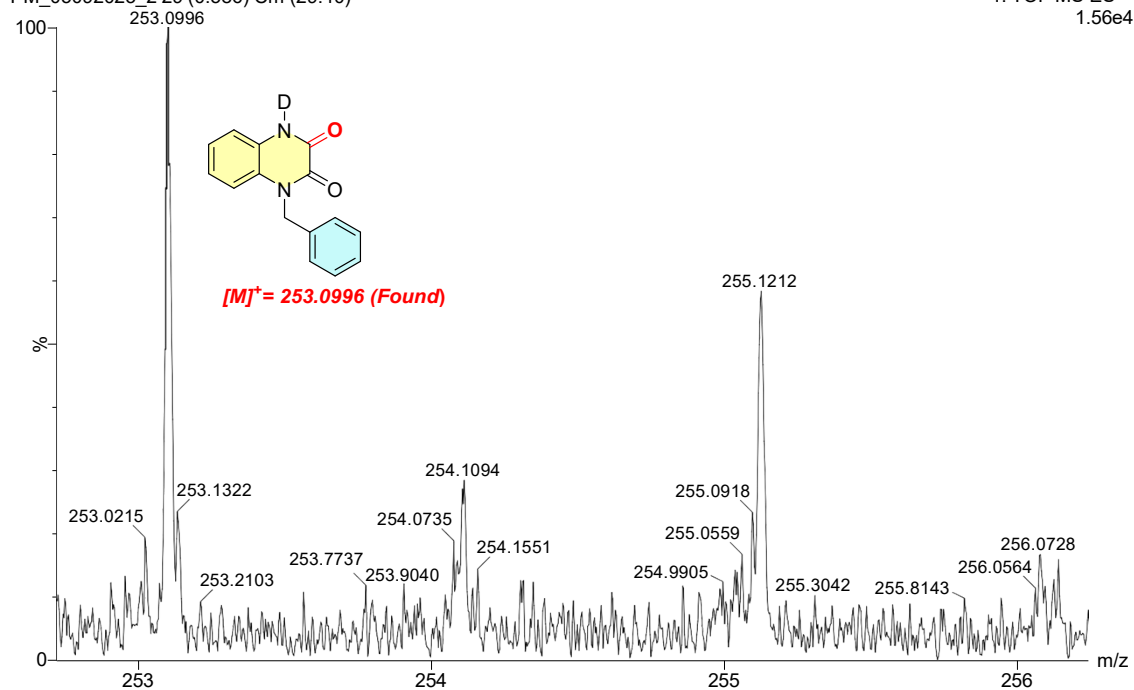

**Figure S101.** HRMS analysis of isotopic labeling experiment in presence of D<sub>2</sub>O.



## REFERENCES

1. (a) S. Sau and P. Mal, *The Journal of Organic Chemistry*, 2022, **87**, 14565; (b) K.-J. Li, Y.-Y. Jiang, K. Xu, C.-C. Zeng and B.-G. Sun, *Green Chem.*, 2019, **21**, 4412.
2. S. Sau and P. Mal, *European Journal of Organic Chemistry*, 2022, **2022**.
3. S.-H. Jung, J.-W. Yeon, Y. Kang and K. Song, *Asian J. Chem.*, 2014, **26**, 4084.
4. A. Manna, T. K. Dinda, S. Ghosh and P. Mal, *Chem. Mater.*, 2023, **35**, 628.
5. S. Sau and P. Mal, *Eur. J. Org. Chem.*, 2022, e202200425.
